# Supplementary material
Source: ML conference proceedings conference paper supplement (https://openreview.net/forum?id=DLhpXZcXuz)

**A**

Timescale of the background activity

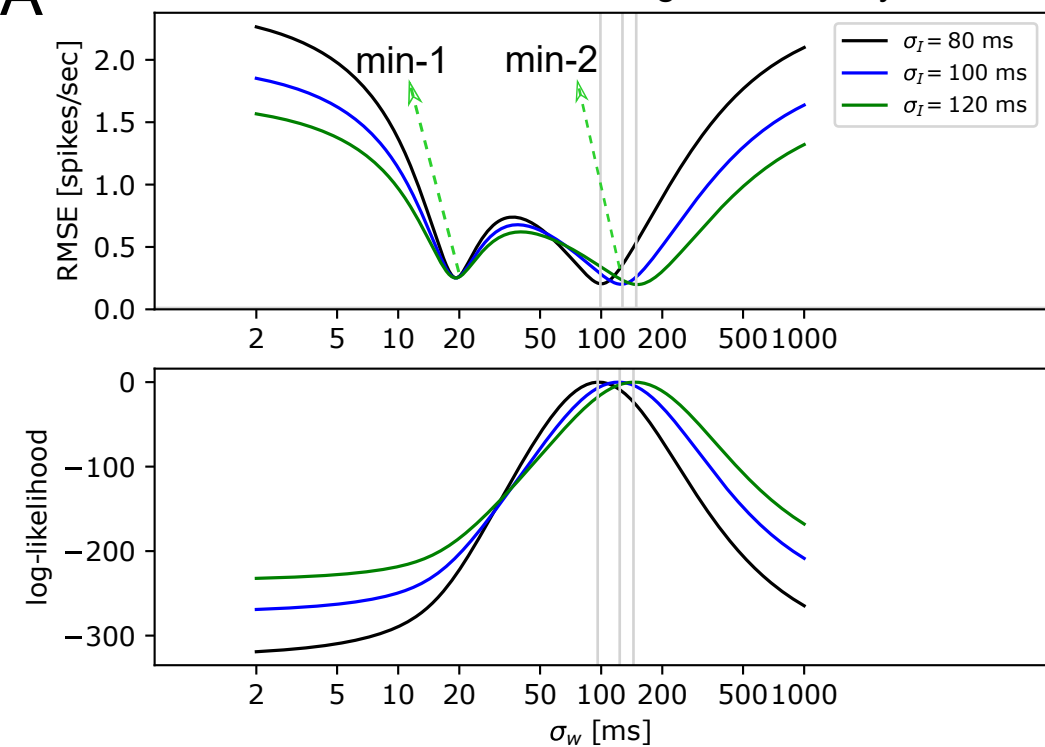**B**

Timescale of the coupling effect

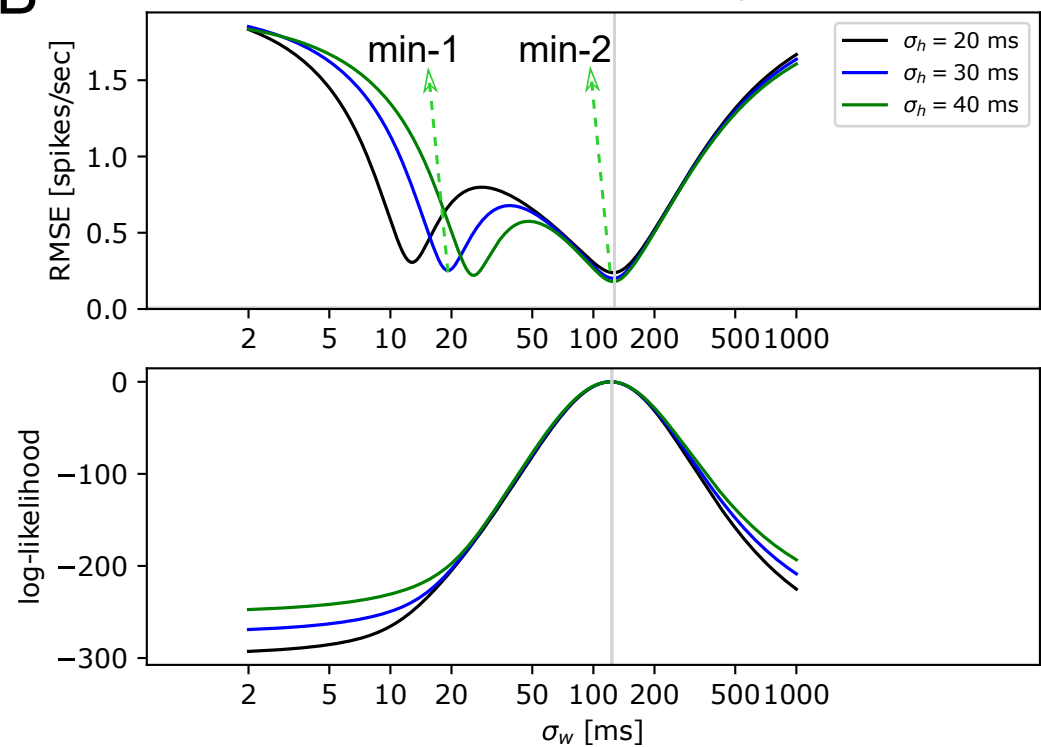**C**

Amplitude of the coupling effect

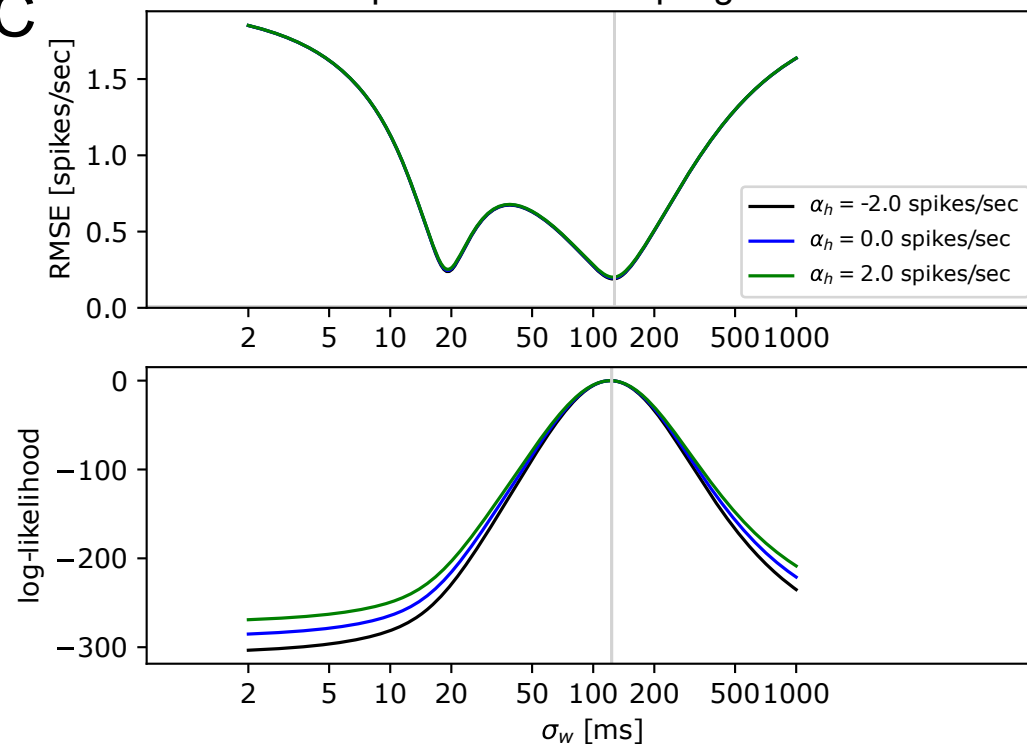

Supplement: supplementary_material [file attachment]
