# Supplementary material
Source: ML conference proceedings conference paper supplement (https://openreview.net/forum?id=DLhpXZcXuz)

Group weights: 0.2, 0.25, 0.15, 0.2, 0.2

**A**

V1→LM coupling filters

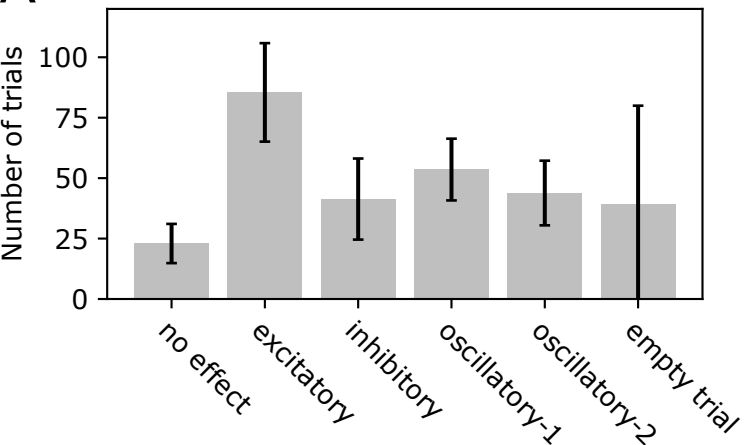

**B**

LM→AL coupling filters

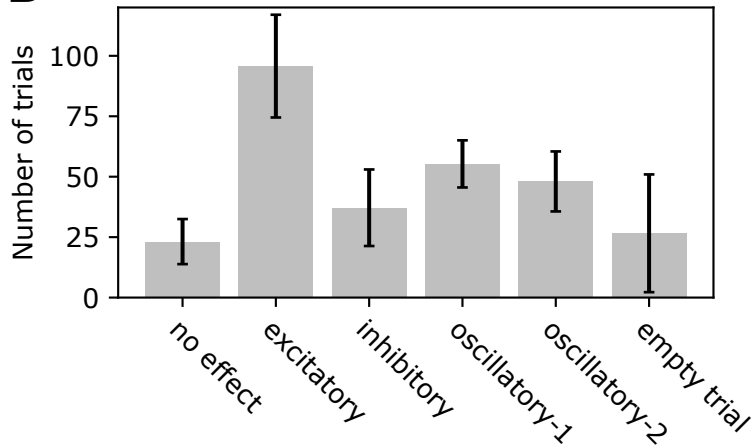

Group weights: 0.25, 0.2, 0.15, 0.2, 0.2

**C**

V1→LM coupling filters

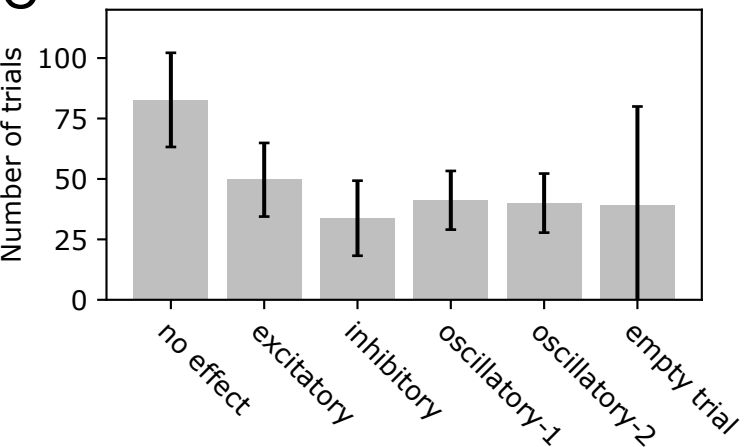

**D**

LM→AL coupling filters

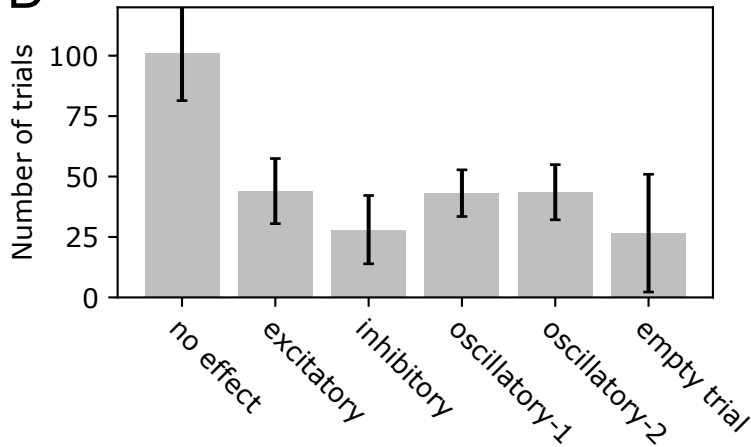

Supplement: supplementary_material [file attachment]
