# Supplementary material
Source: ML conference proceedings conference paper supplement (https://openreview.net/forum?id=DLhpXZcXuz)

Coupling filter estimator's timescale = 20 ms, smaller than true timescale 30 ms

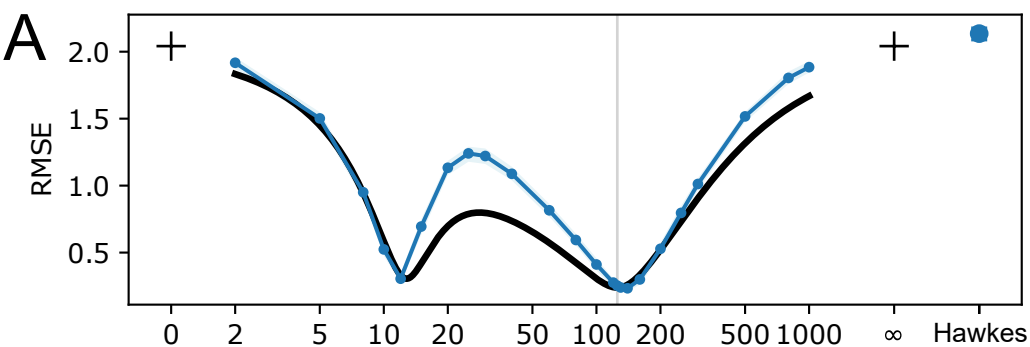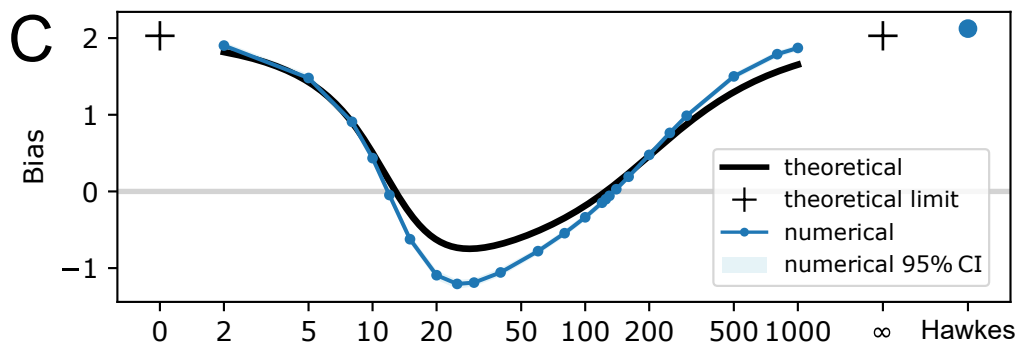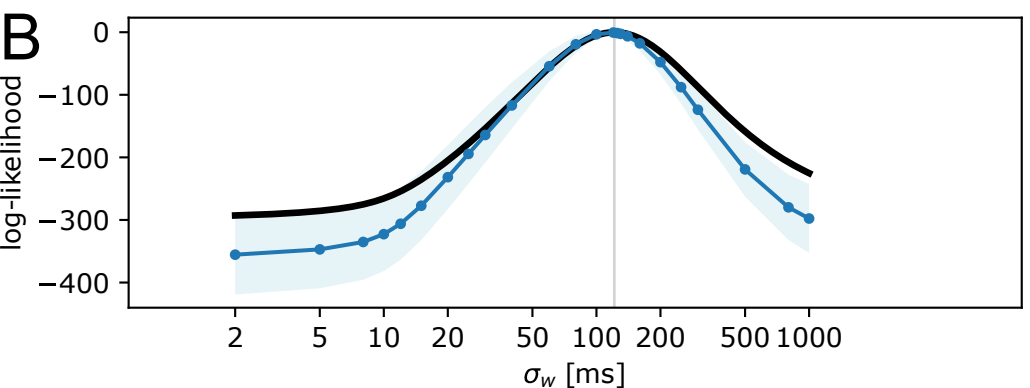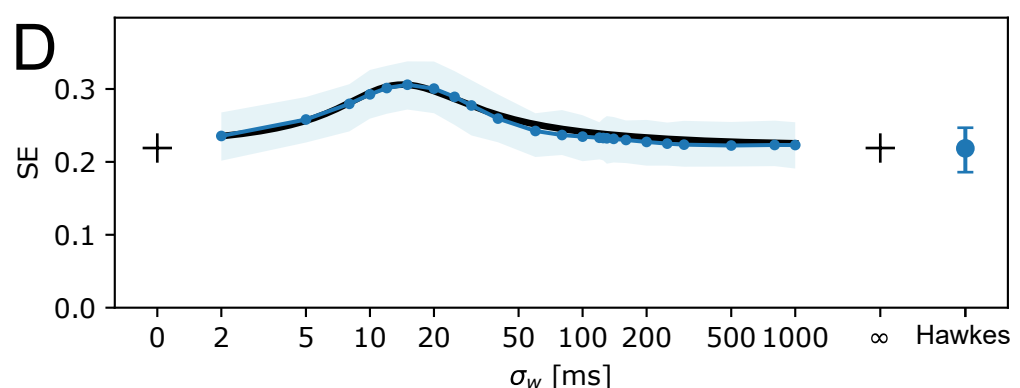

Coupling filter estimator's timescale = 40 ms, larger than true timescale 30 ms

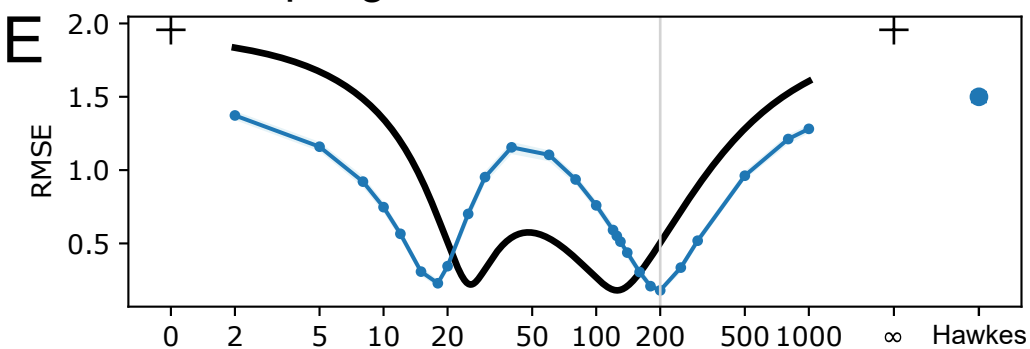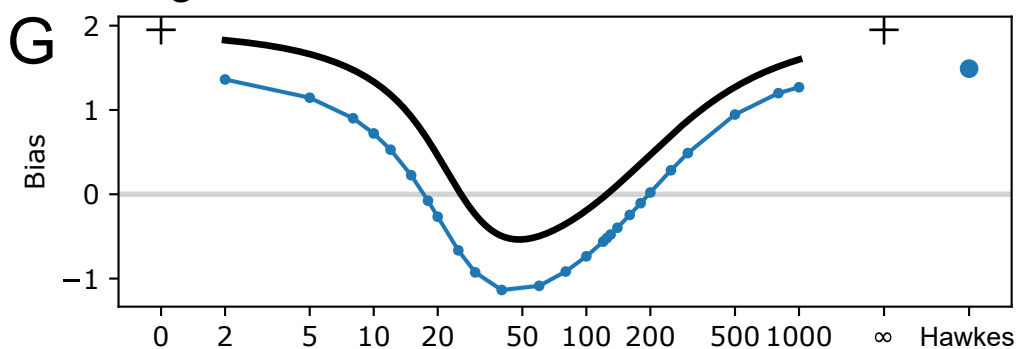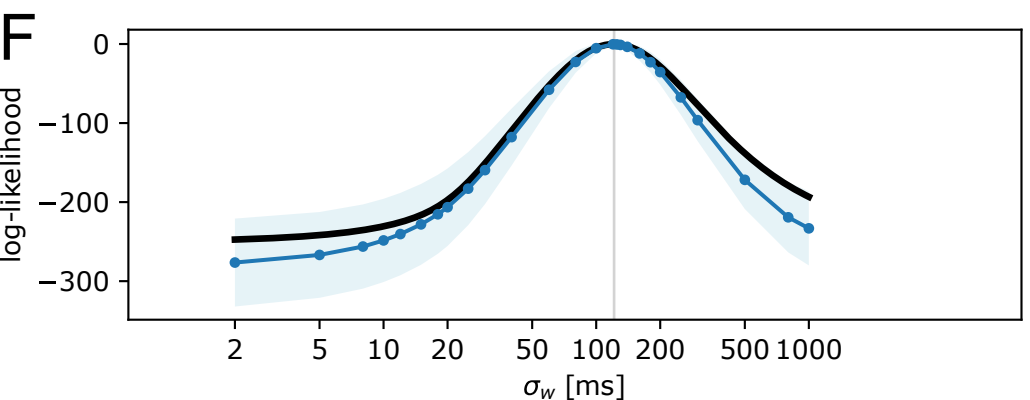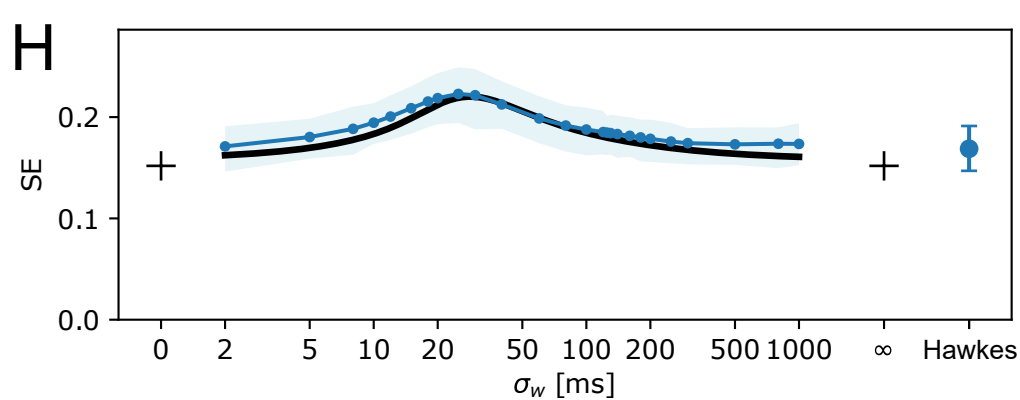

Supplement: supplementary_material [file attachment]
