# Supplementary material
Source: ML conference proceedings conference paper supplement (https://openreview.net/forum?id=DLhpXZcXuz)

**A**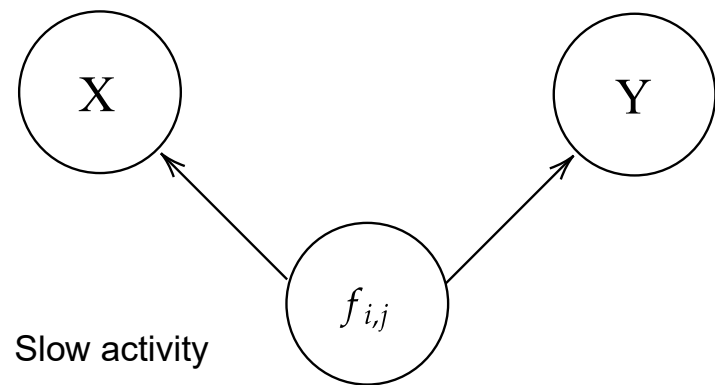**B**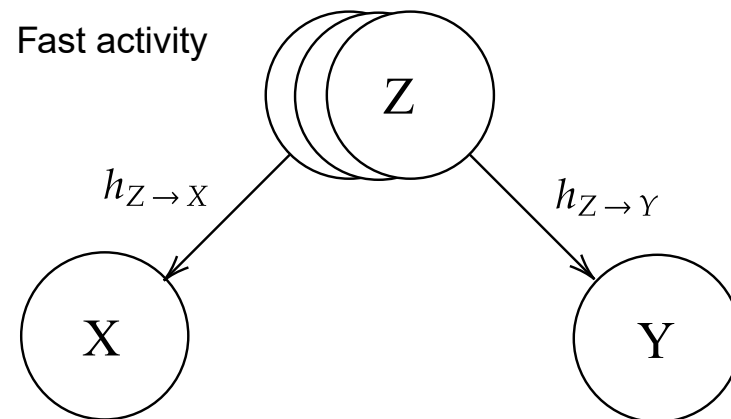**C**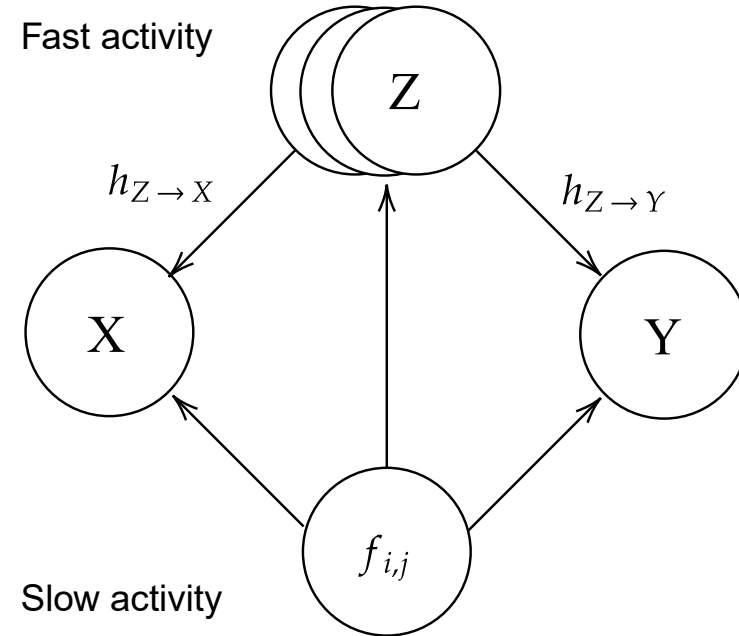**D** No slow background + spike driver bivariate model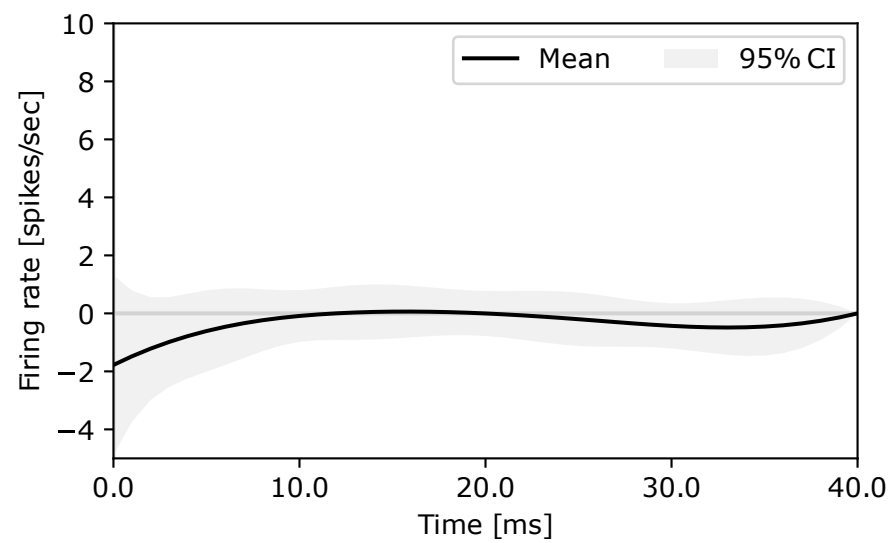**E** Slow background + spike driver bivariate model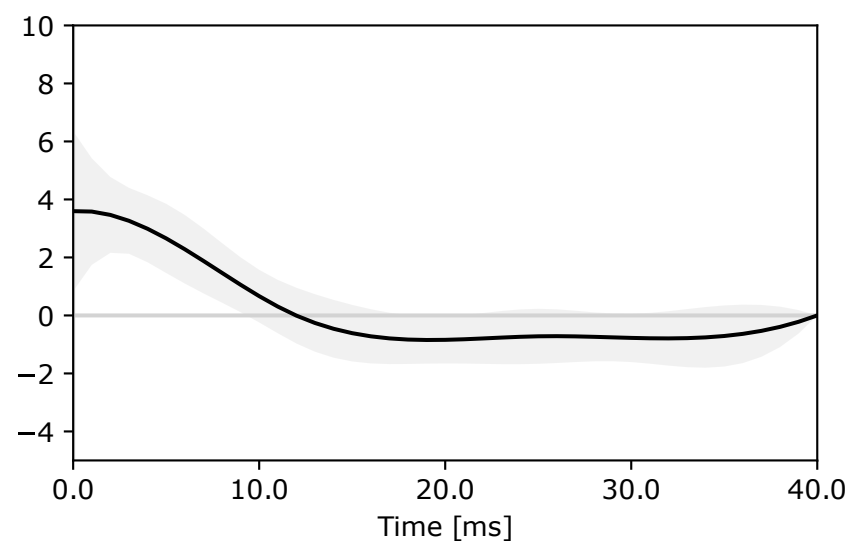**F** Slow background + spike driver multivariate model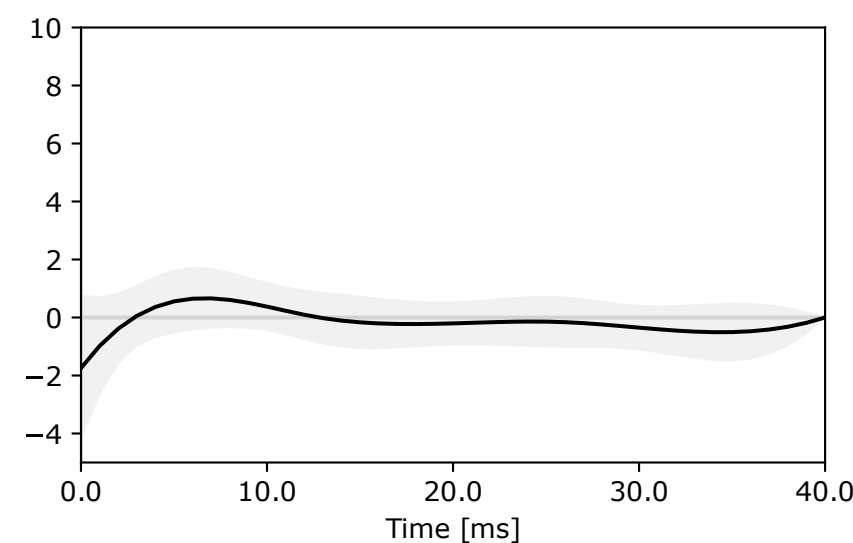

Supplement: supplementary_material [file attachment]
