# Supplementary material
Source: ML conference proceedings conference paper supplement (https://openreview.net/forum?id=DLhpXZcXuz)

**A****Excitatory effect**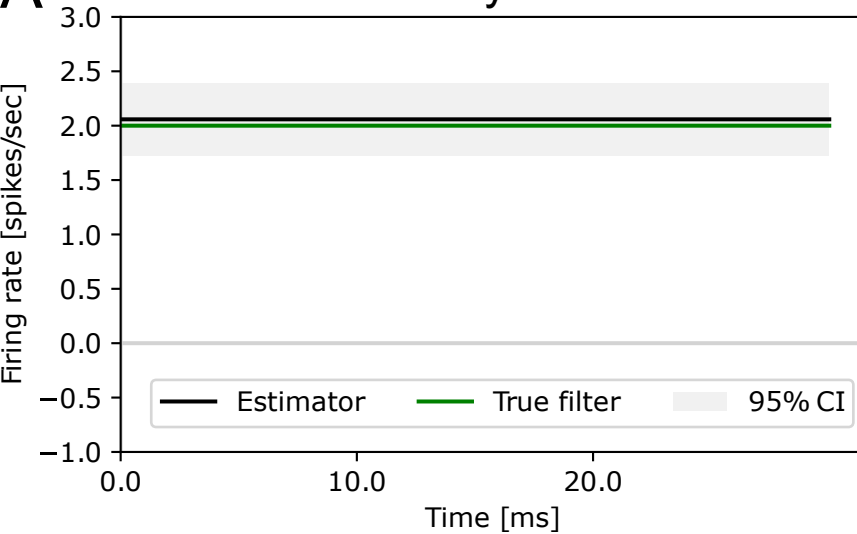**B****jitter window = 5 ms**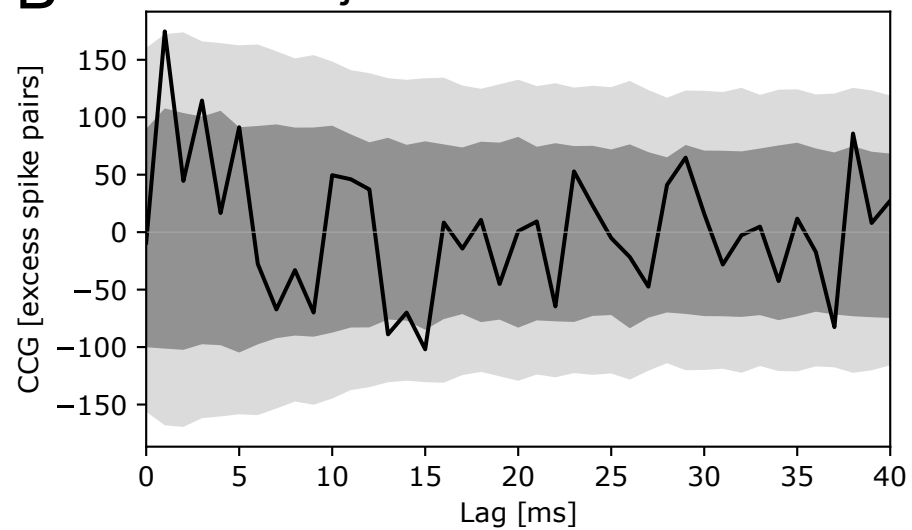**C****jitter window = 10 ms**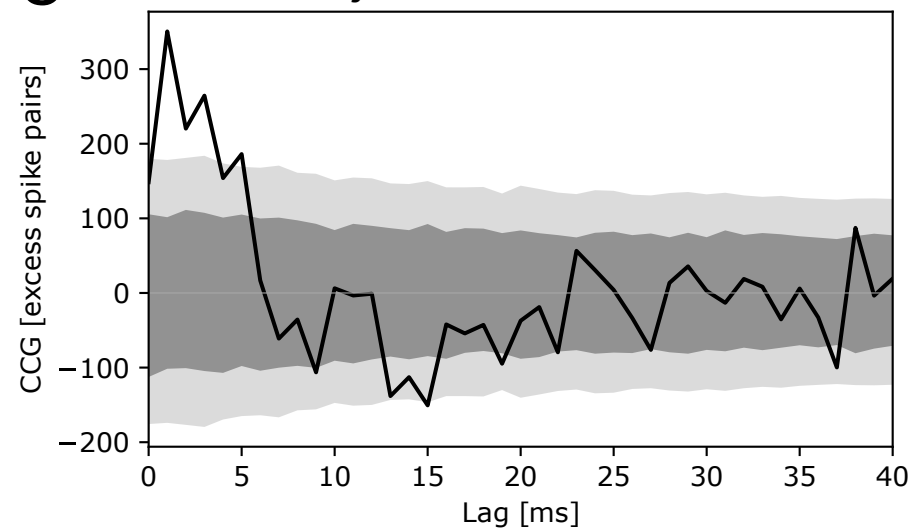**D****No coupling effect**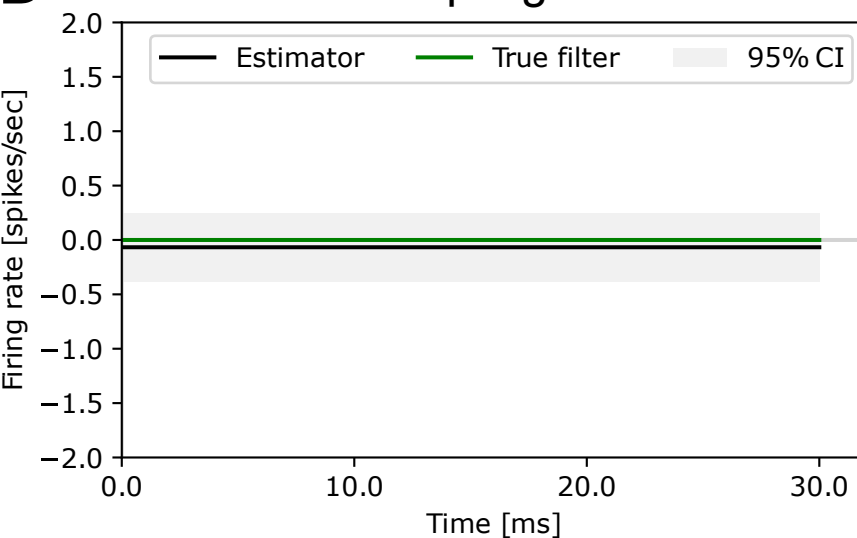**E****jitter window = 5 ms**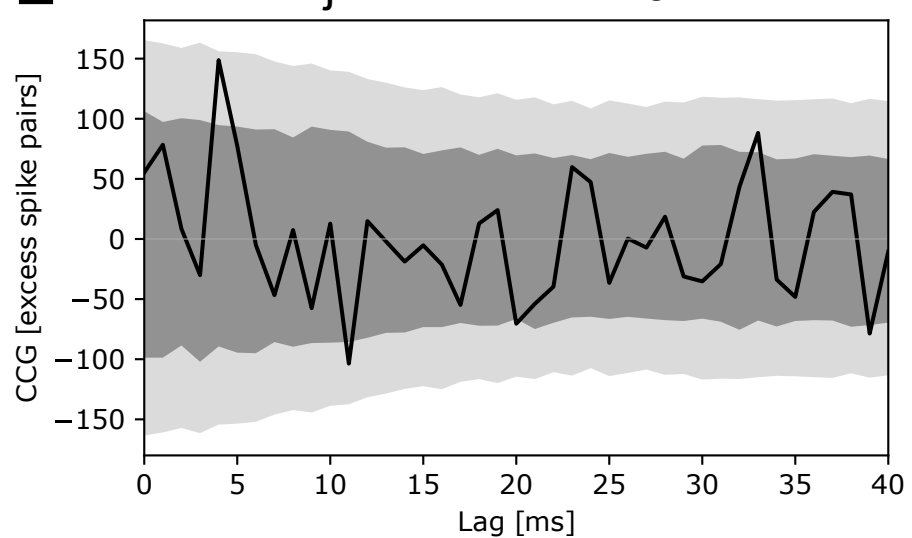**F****jitter window = 10 ms**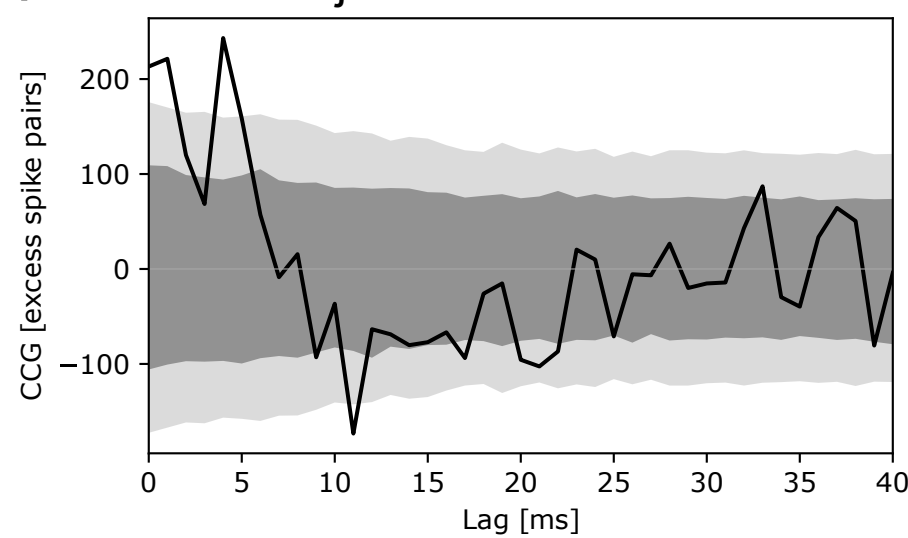

Supplement: supplementary_material [file attachment]
