# Supplementary material
Source: ML conference proceedings conference paper supplement (https://openreview.net/forum?id=DLhpXZcXuz)

**Real data****Jitter-based CCG**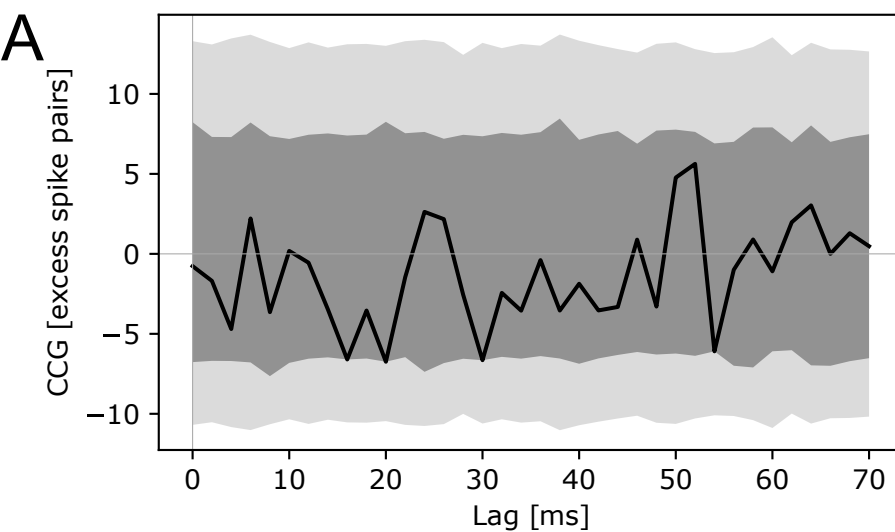**Coupling filter**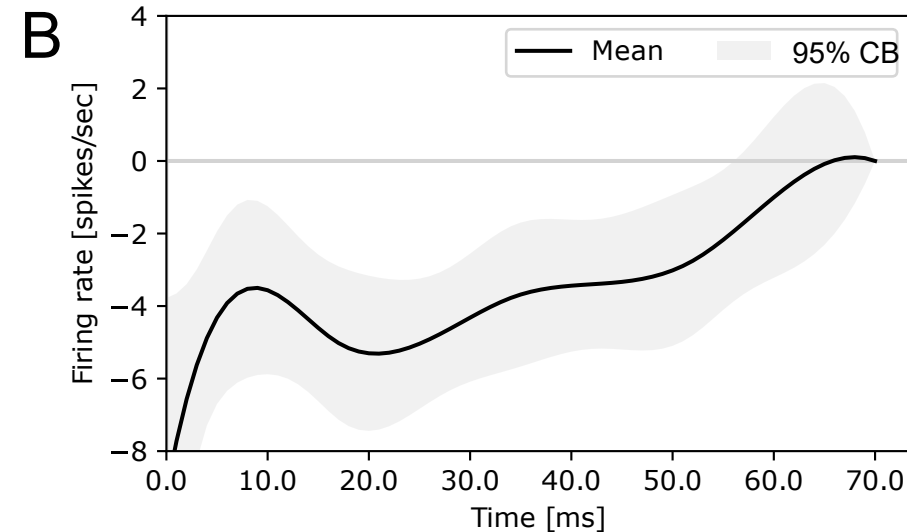**Coupling filter with artifacts**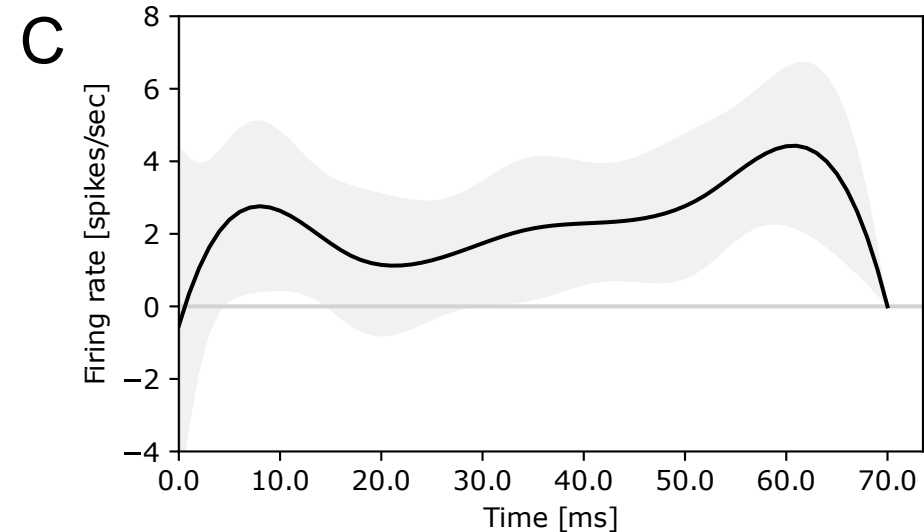**Simulation****Jitter-based CCG**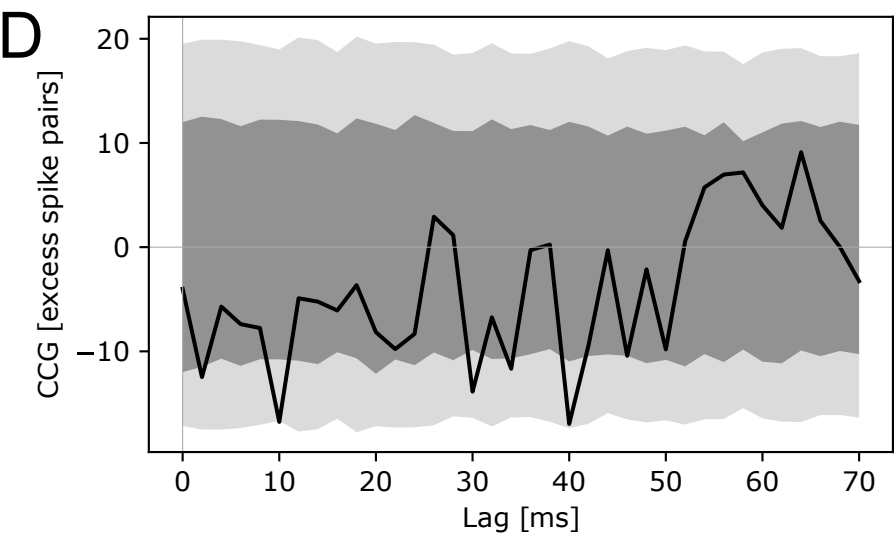**Coupling filter**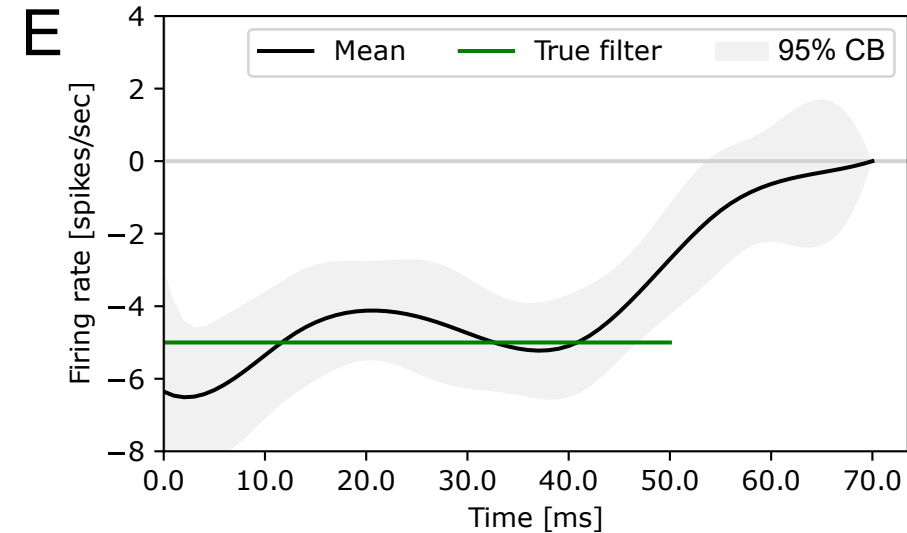**Coupling filter with artifacts**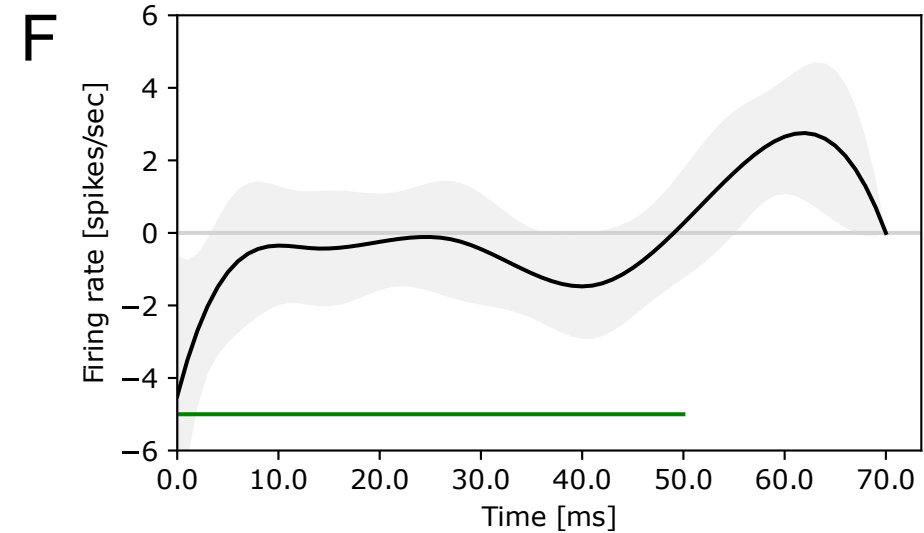

Supplement: supplementary_material [file attachment]
