# Supplementary material
Source: ML conference proceedings conference paper supplement (https://openreview.net/forum?id=DLhpXZcXuz)
Supplement: supplementary_material [file attachment]

Smoothing kernel width = 50 ms

A

V1→LM pairs

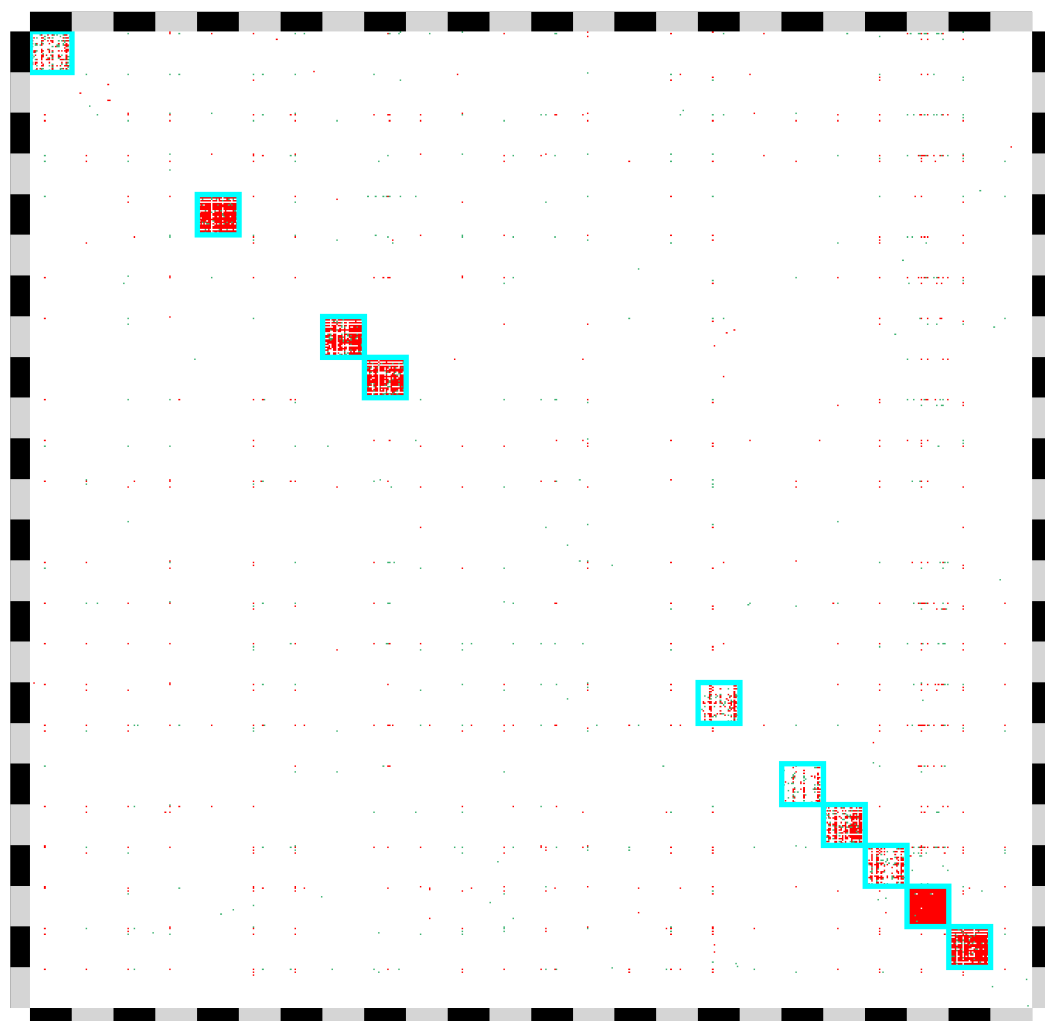

B

V1→LM pairs

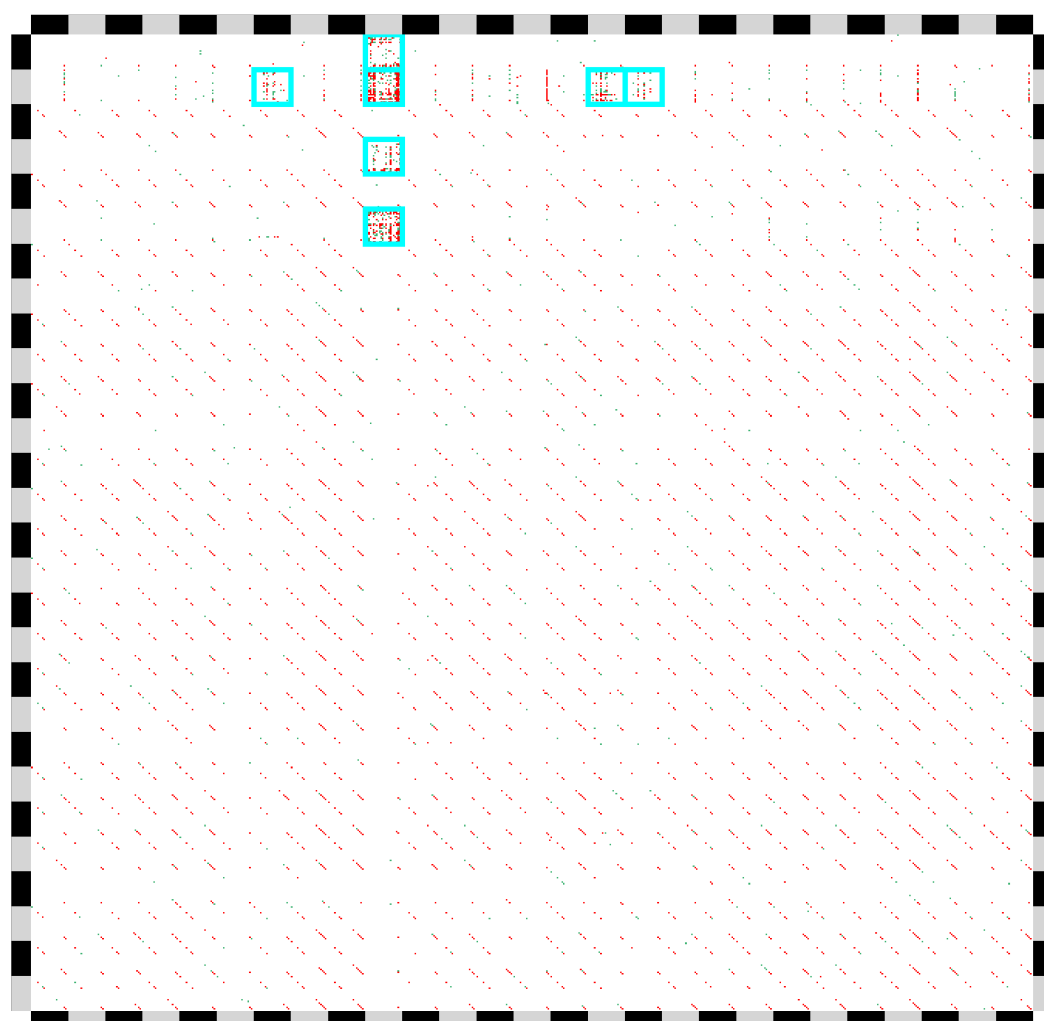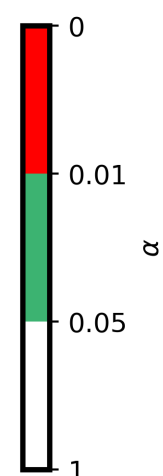

Smoothing kernel width = 80 ms

C

V1→LM pairs

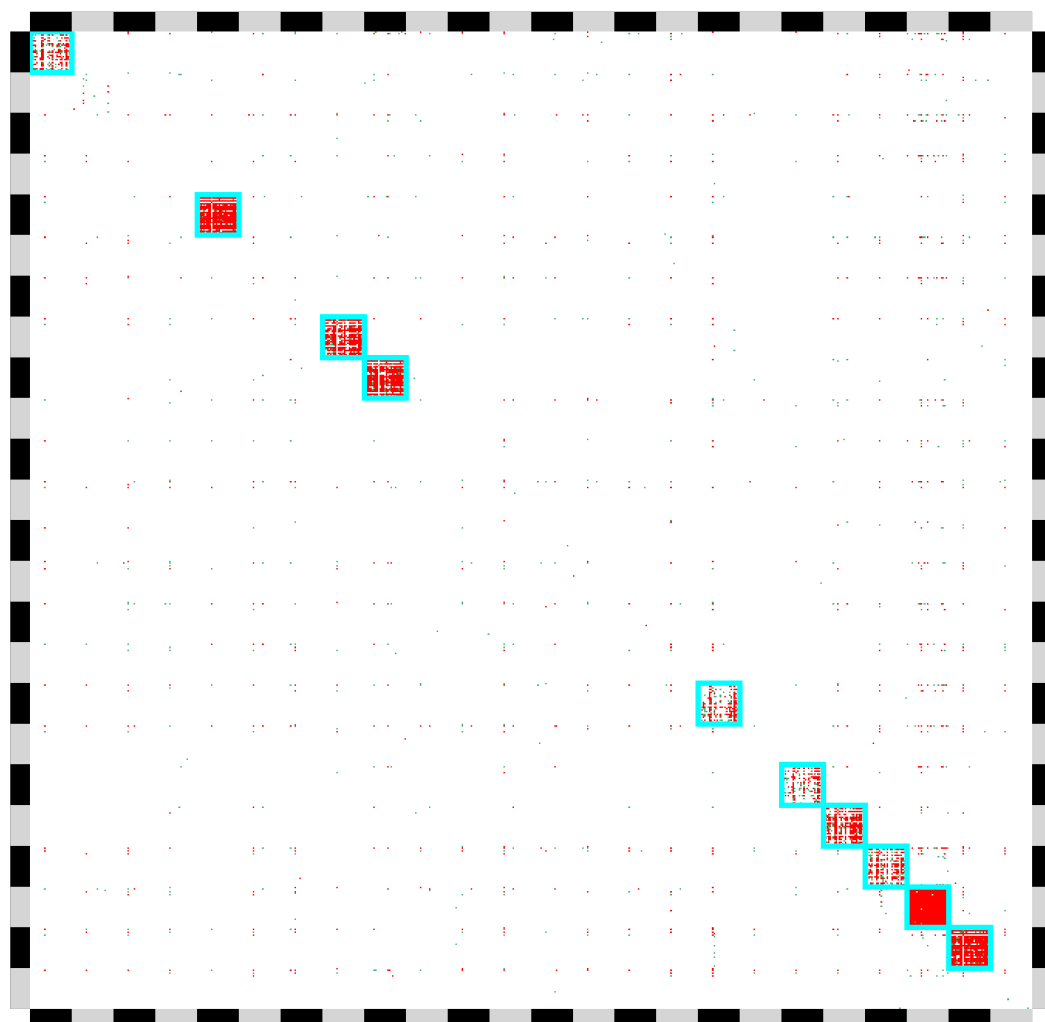

D

V1→LM pairs

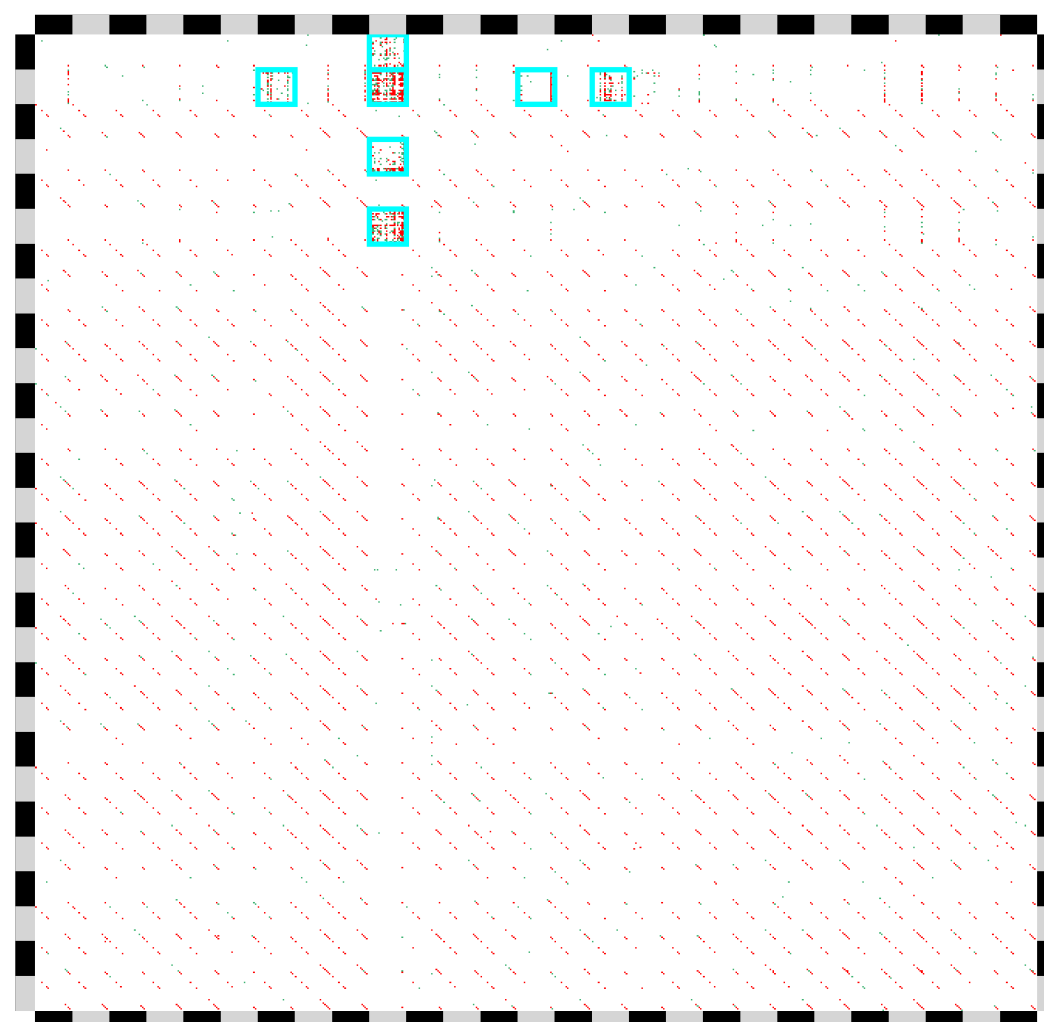

LM→AL pairs
