# Supplementary material
Source: ML conference proceedings conference paper supplement (https://openreview.net/forum?id=DLhpXZcXuz)

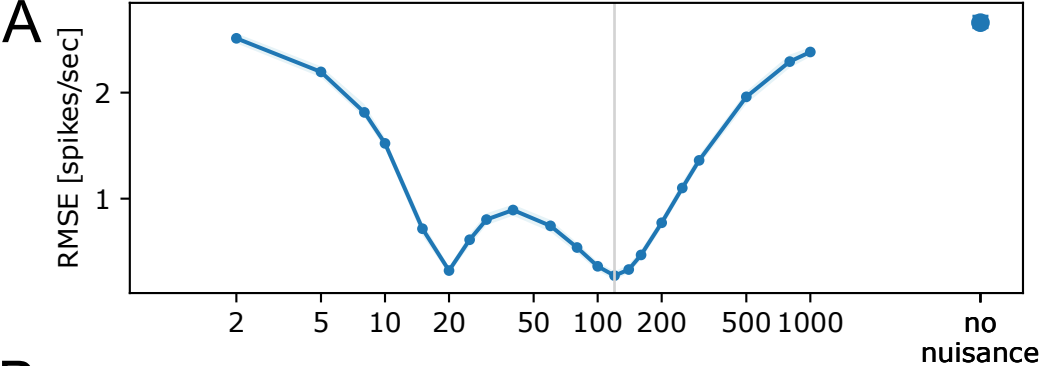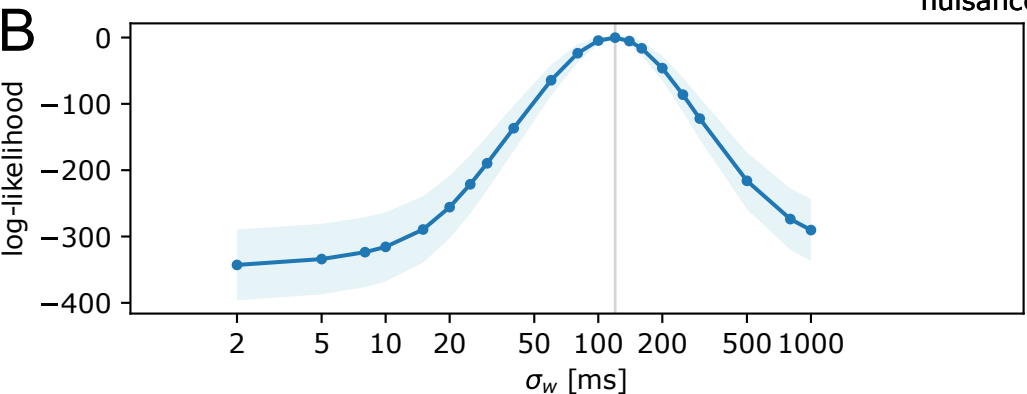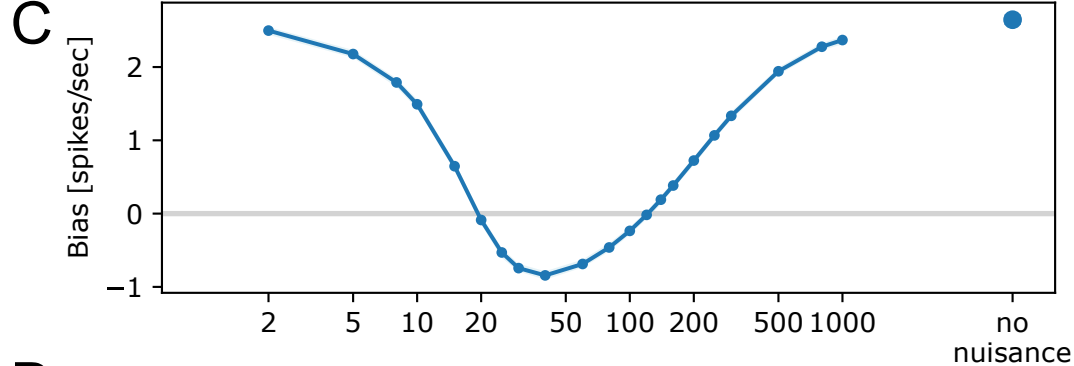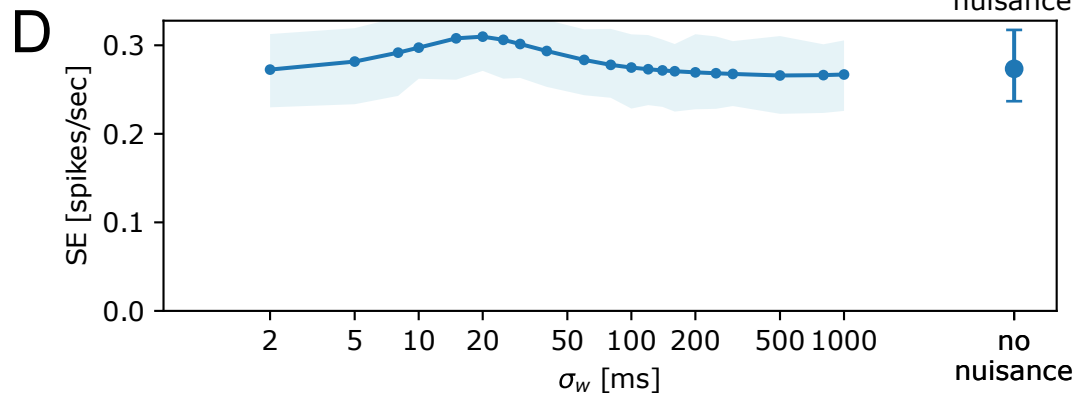

Supplement: supplementary_material [file attachment]

**A**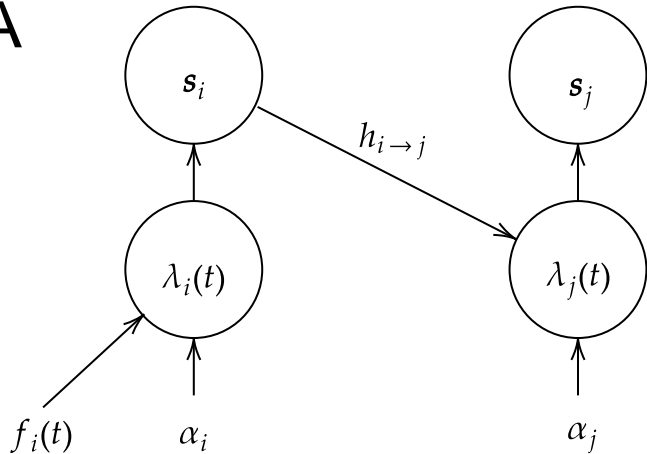**B**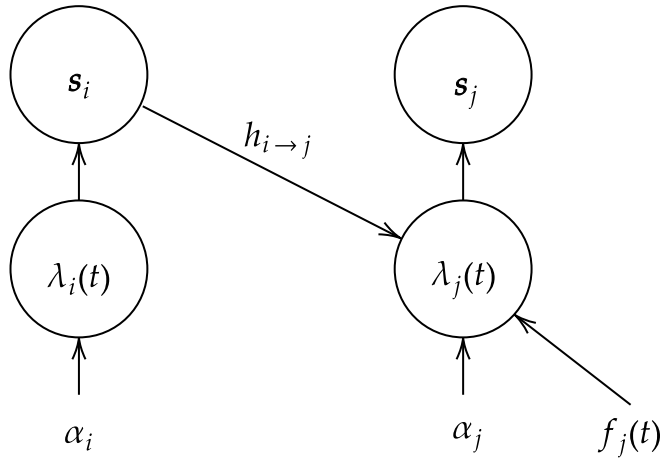

Supplement: supplementary_material [file attachment]

**A**

V1→LM pairs

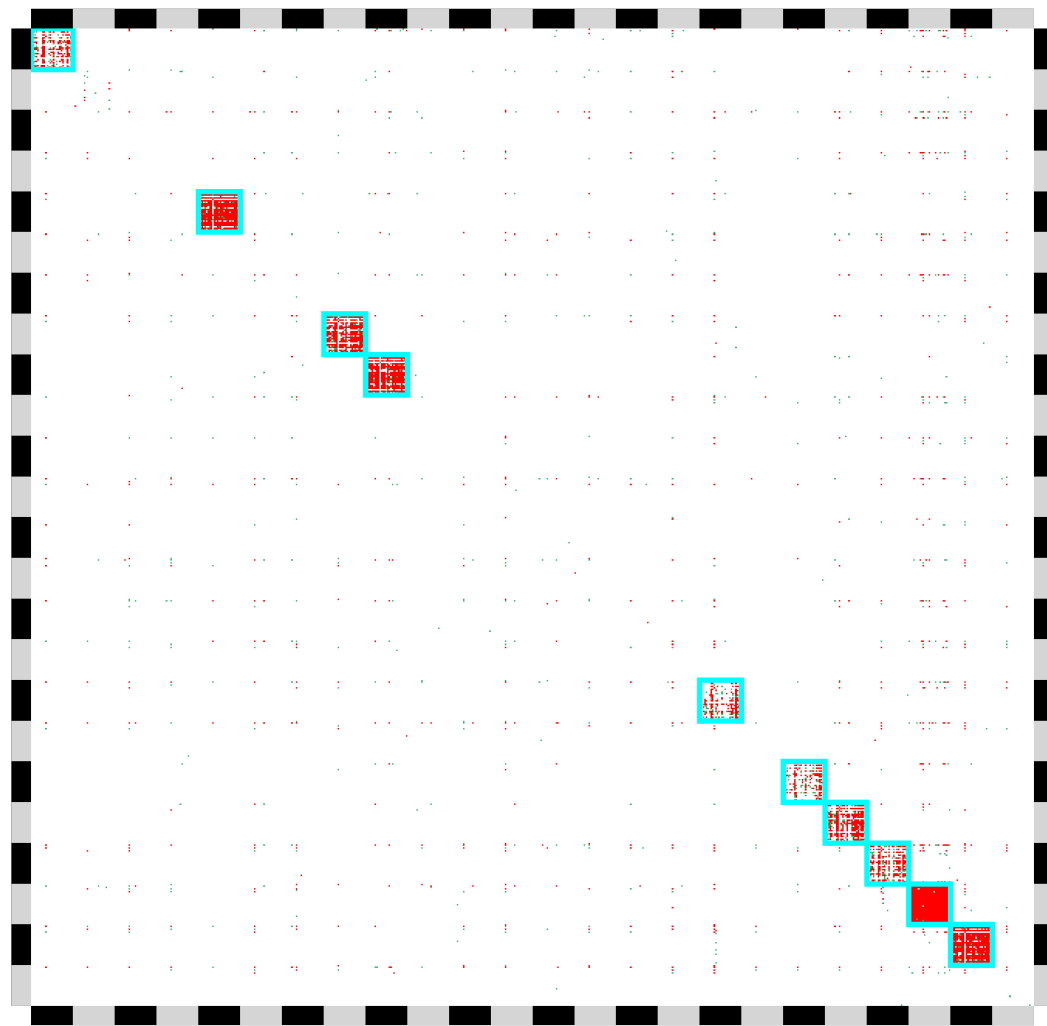

LM→AL pairs

**B**

V1→LM pairs

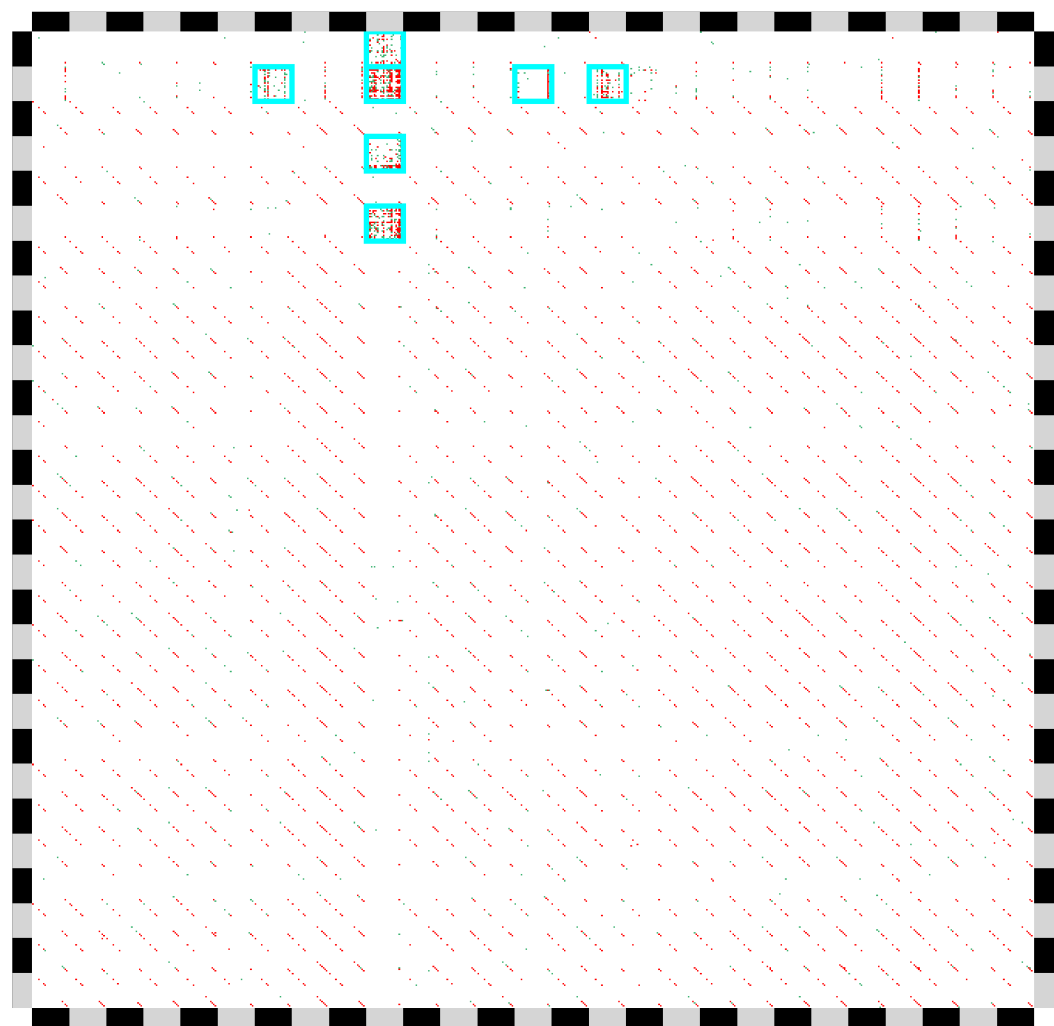

LM→AL pairs

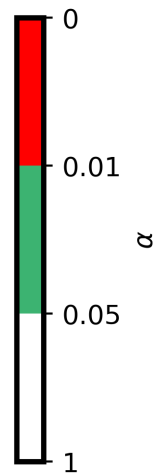

Supplement: supplementary_material [file attachment]

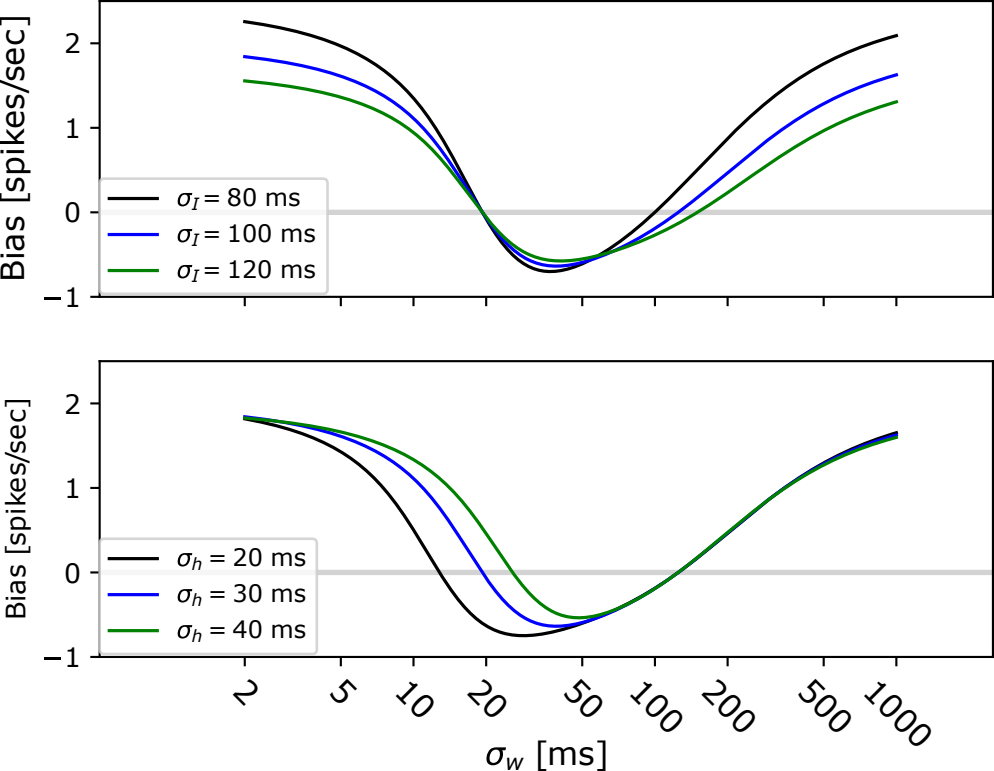

Supplement: supplementary_material [file attachment]

**A**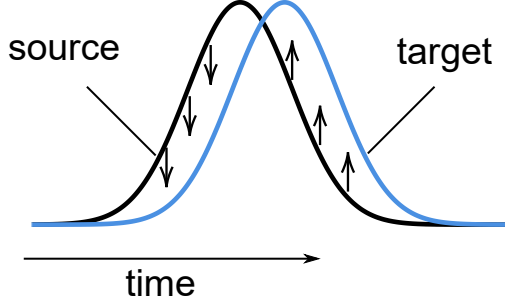**B**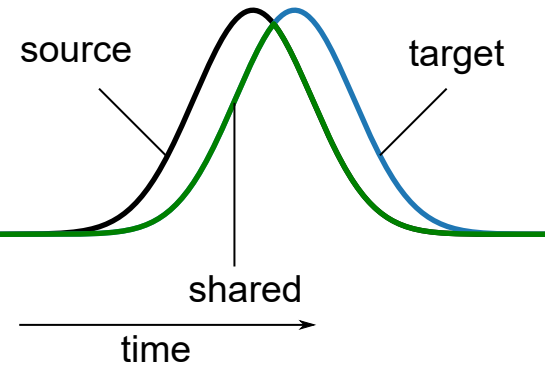**C**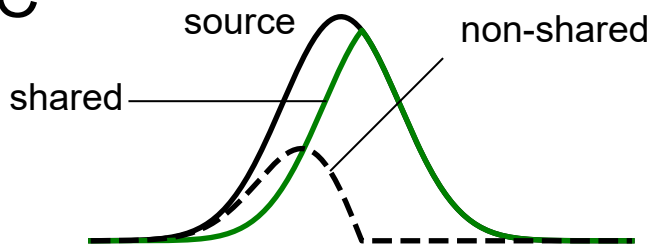**D**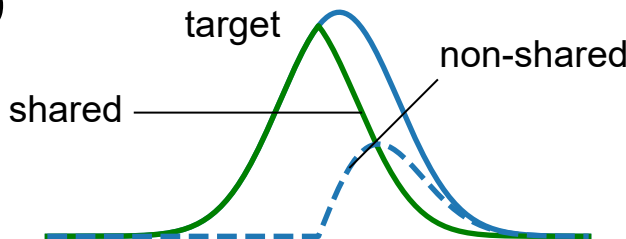

Supplement: supplementary_material [file attachment]

**A**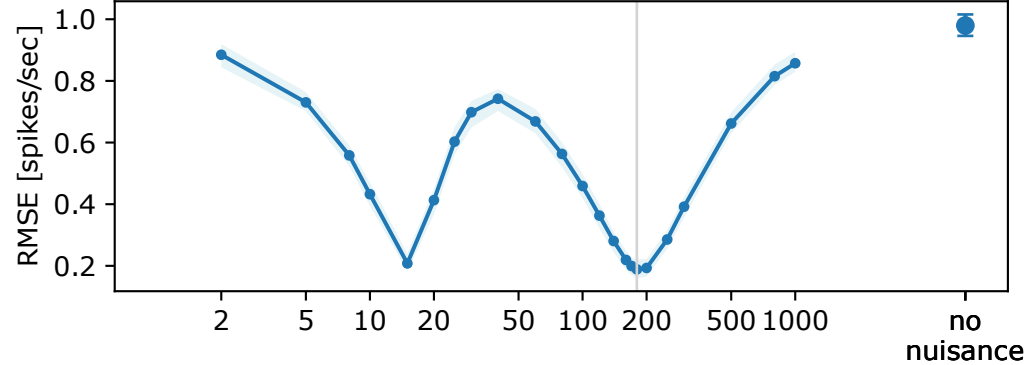**B**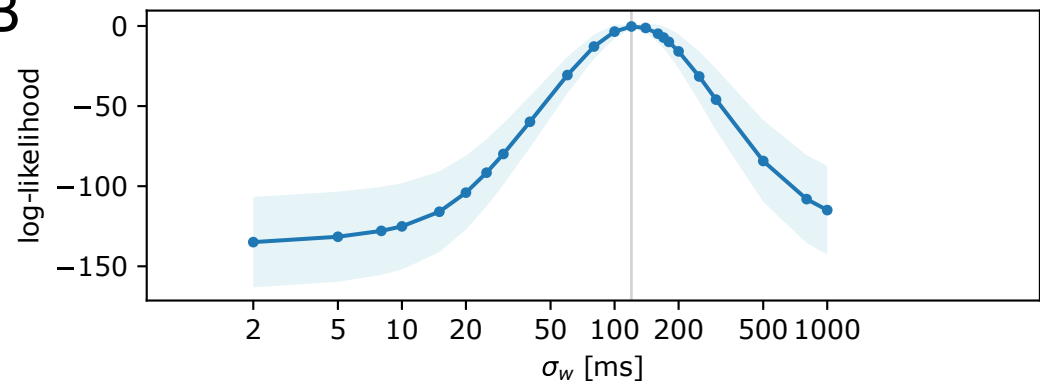**C**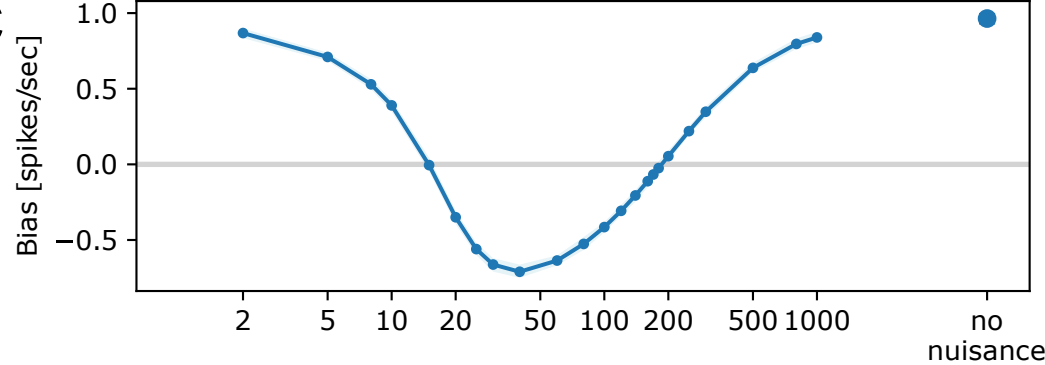**D**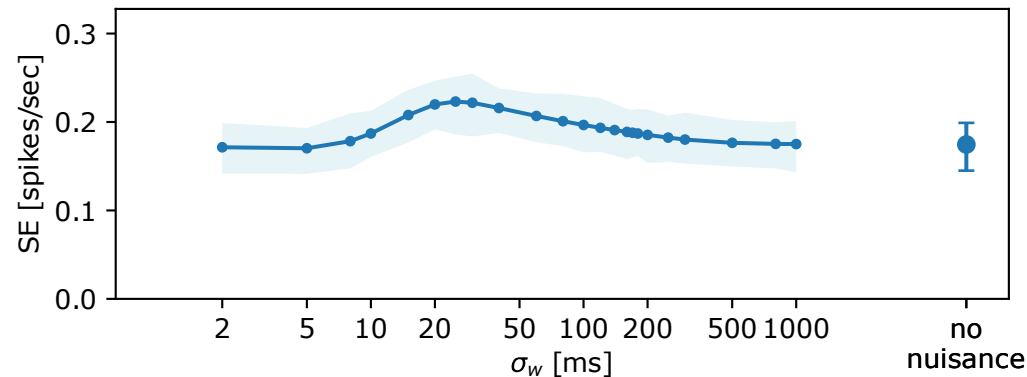

Supplement: supplementary_material [file attachment]

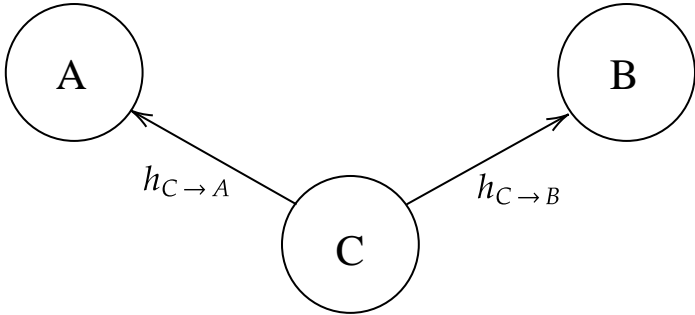

Supplement: supplementary_material [file attachment]

Bottom-up connections

Top-down connections

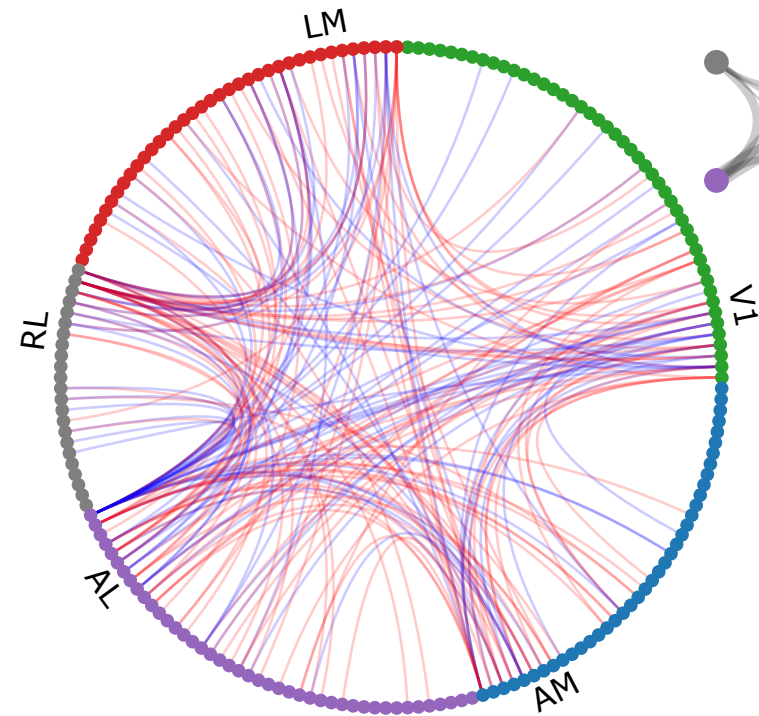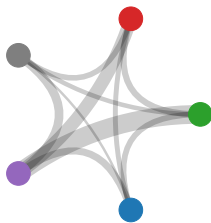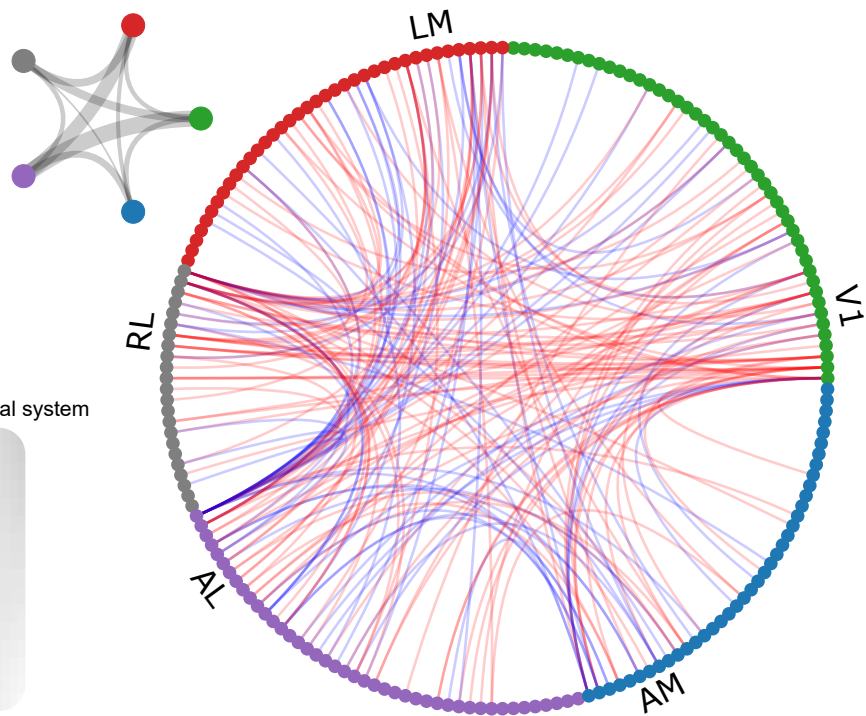

Hierarchical visual system

Top

AM

AL

RL

LM

Bottom

V1

Supplement: supplementary_material [file attachment]

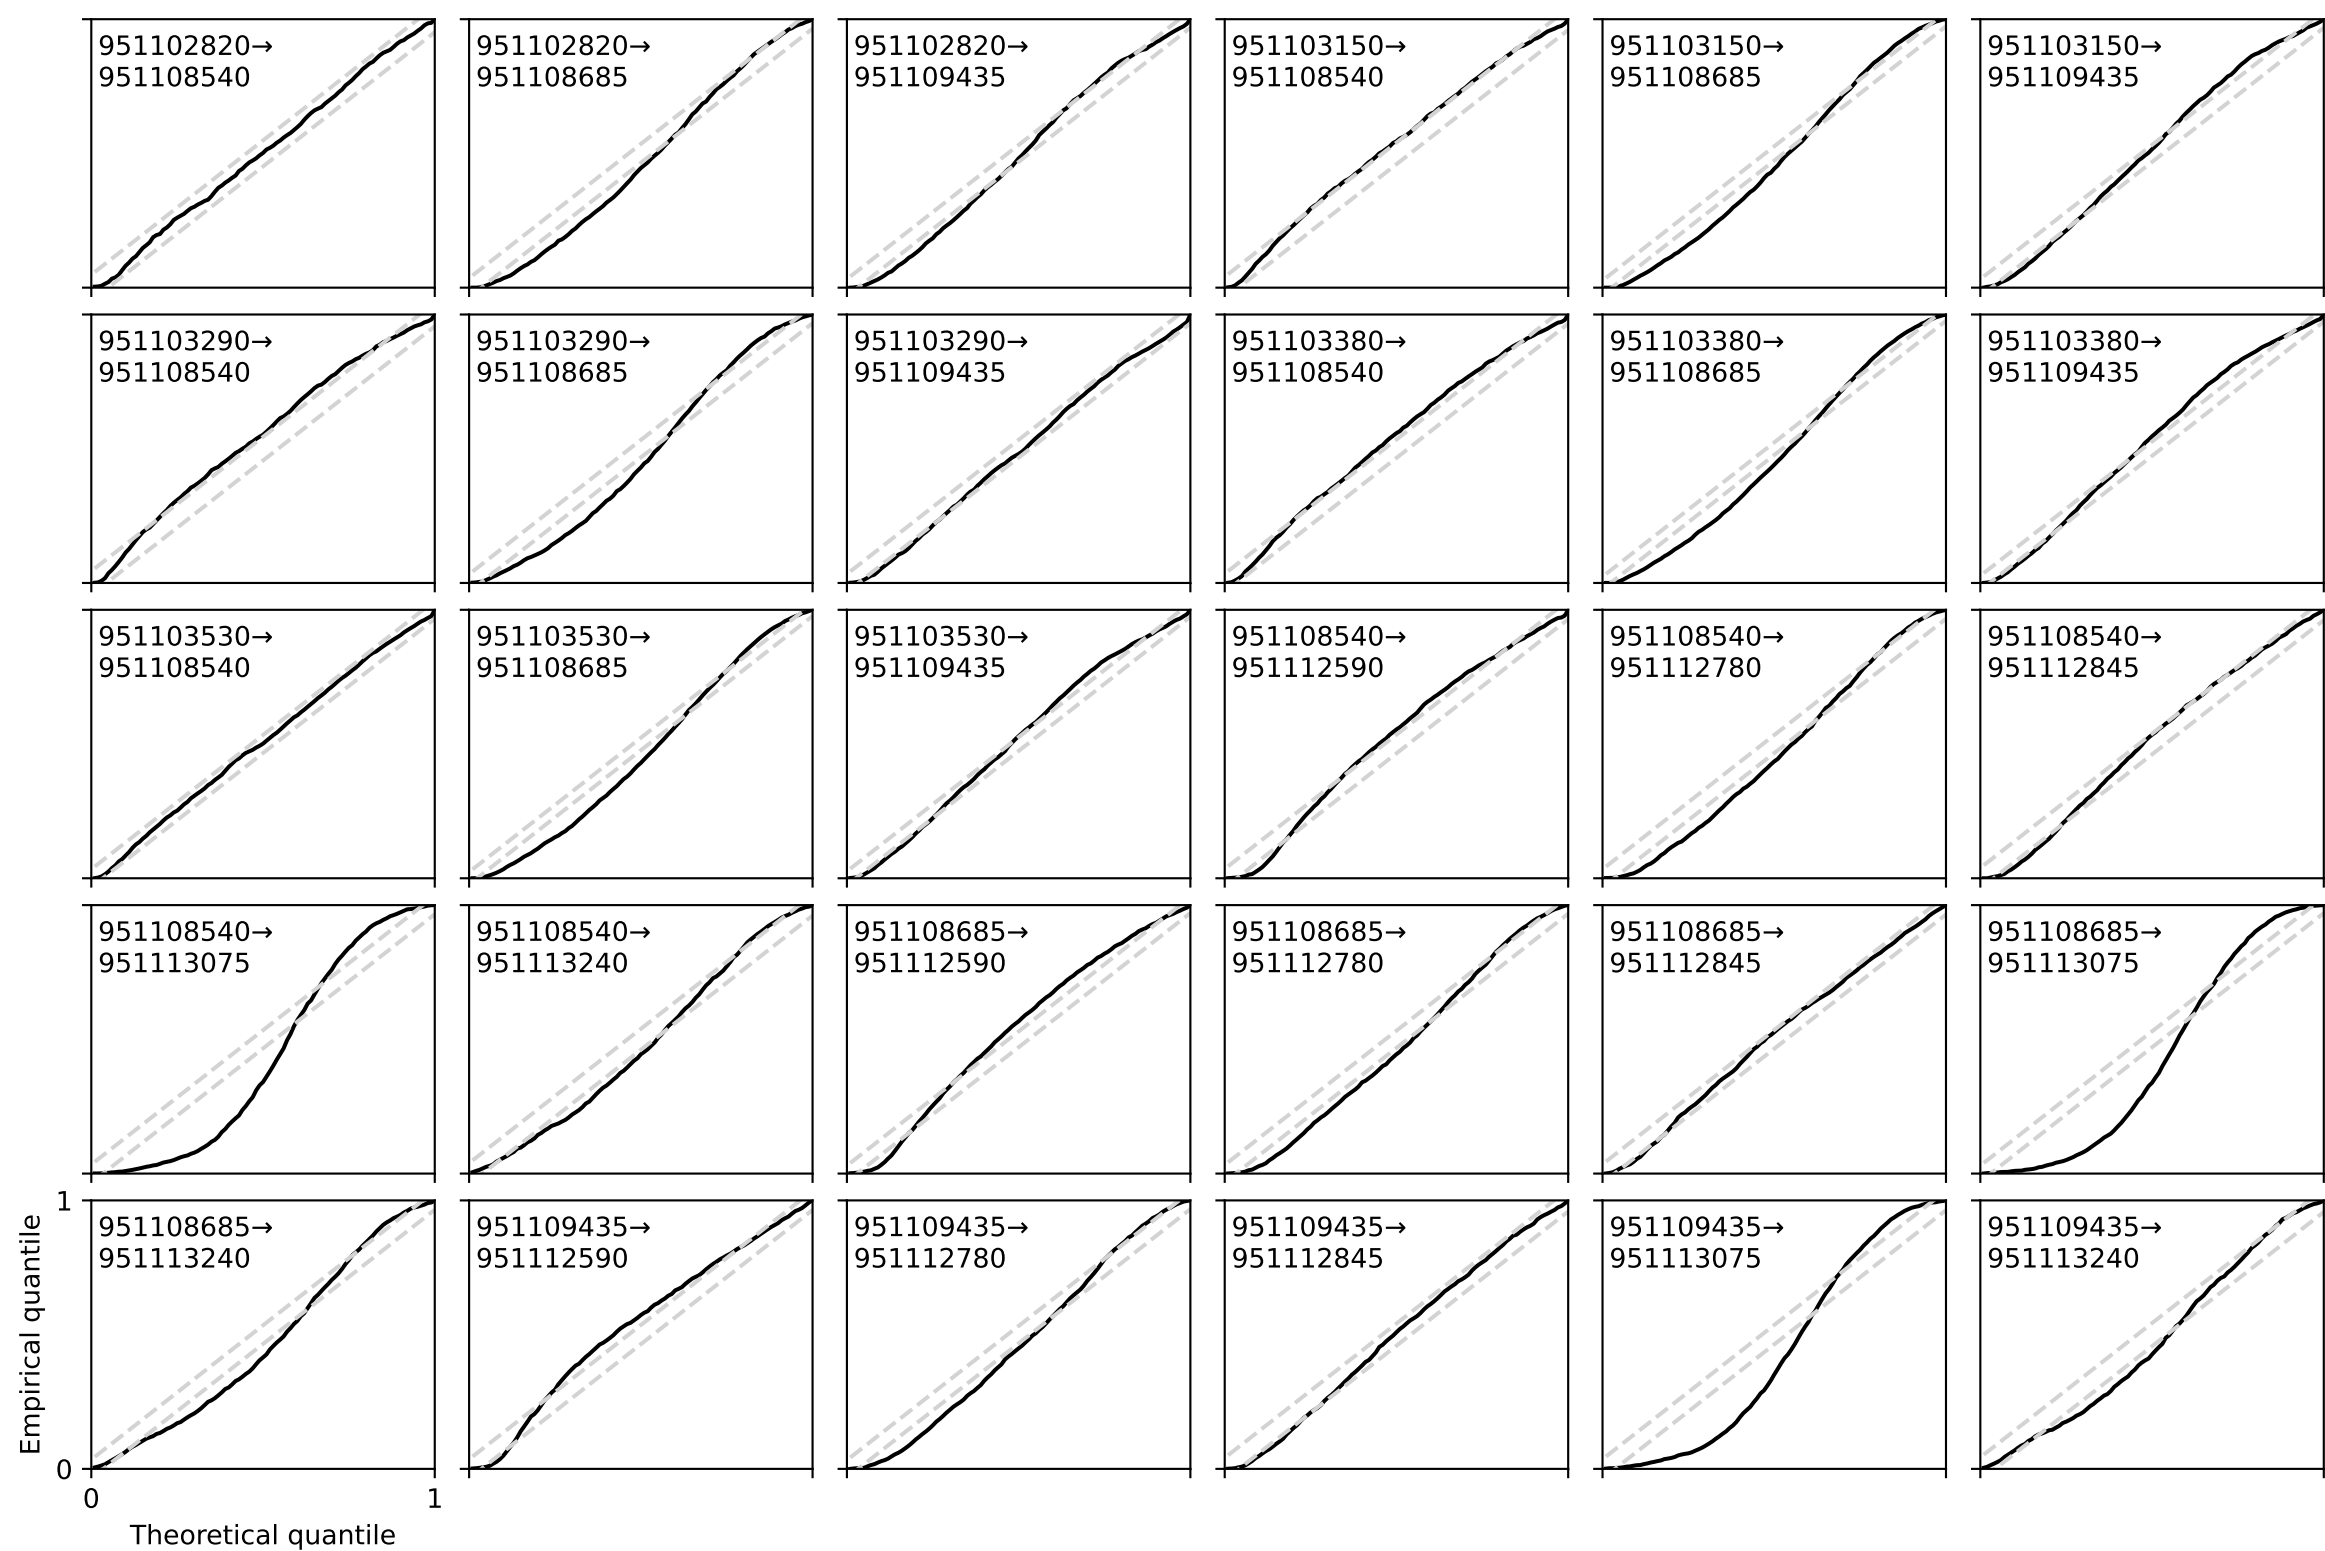

Supplement: supplementary_material [file attachment]

**A**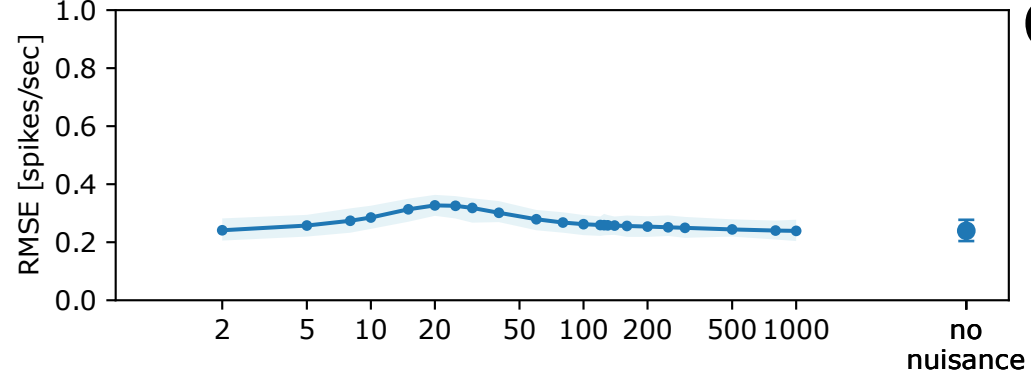**B**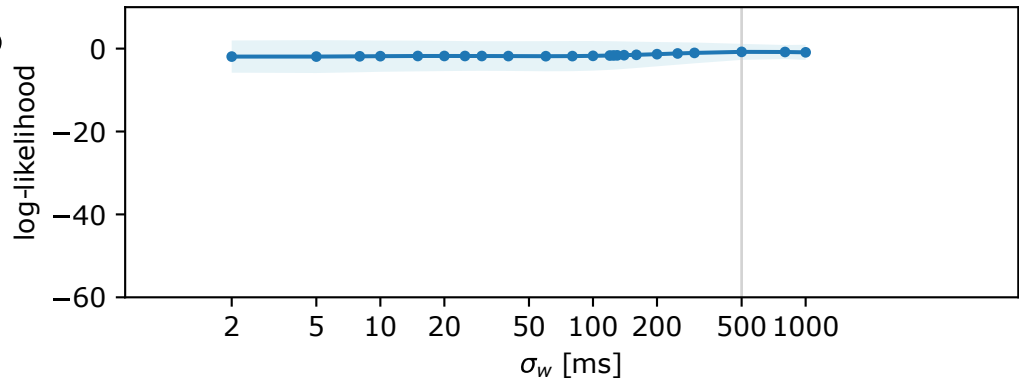**C**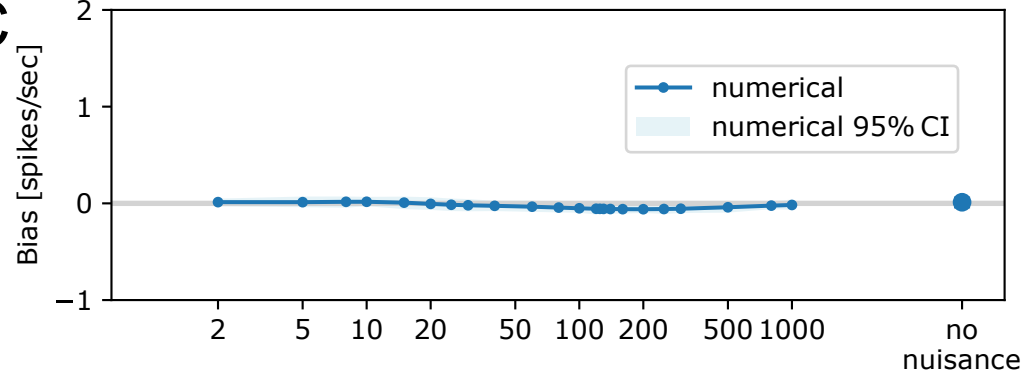**D**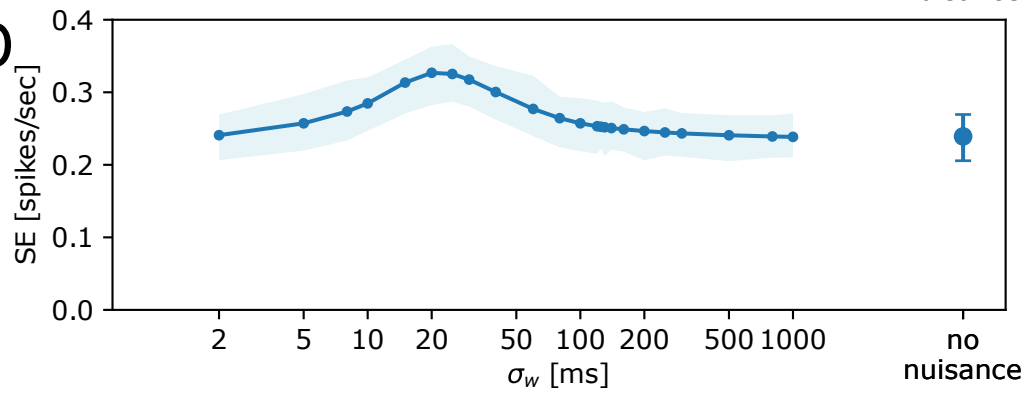

Supplement: supplementary_material [file attachment]

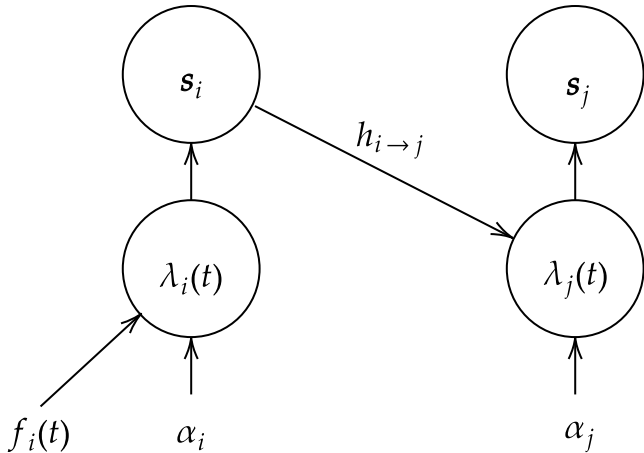

Supplement: supplementary_material [file attachment]

A

V1→LM pairs

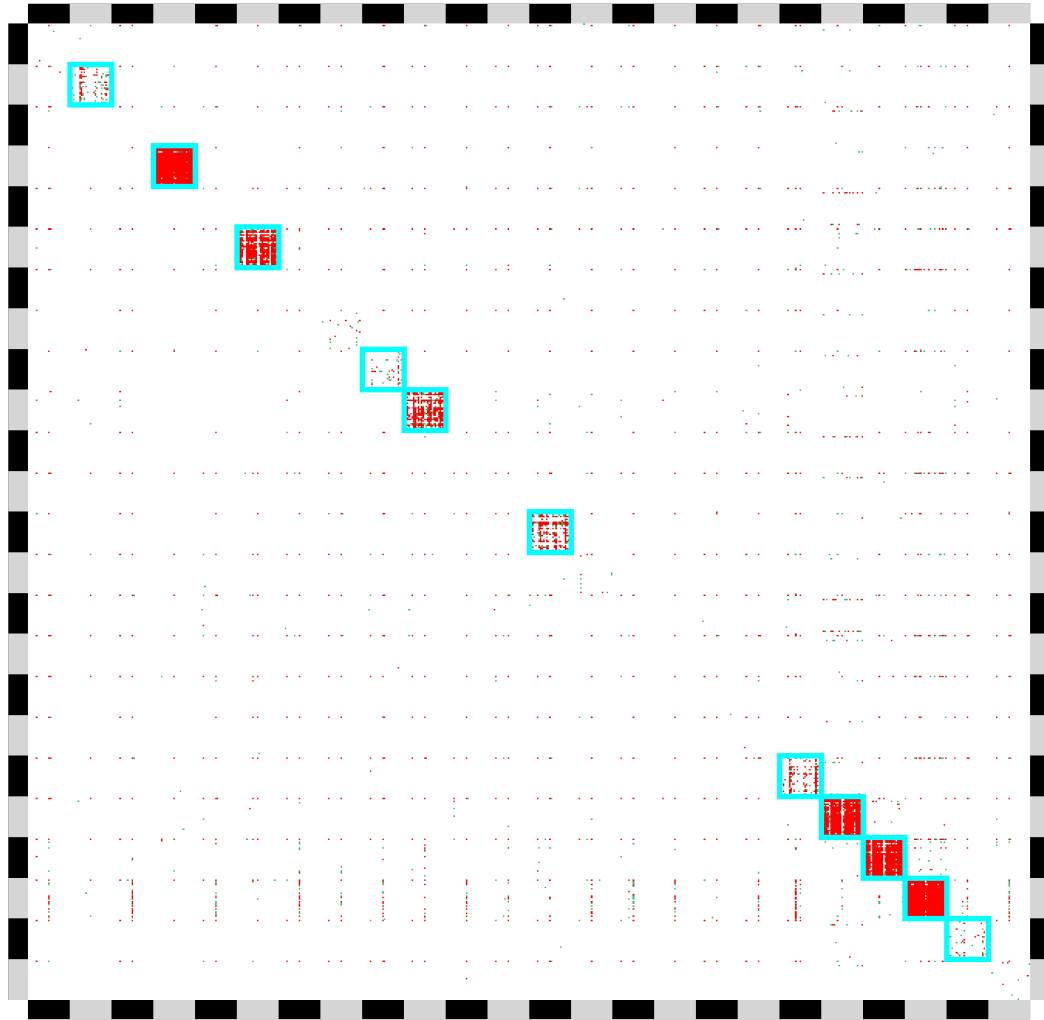

LM→AL pairs

B

V1→LM pairs

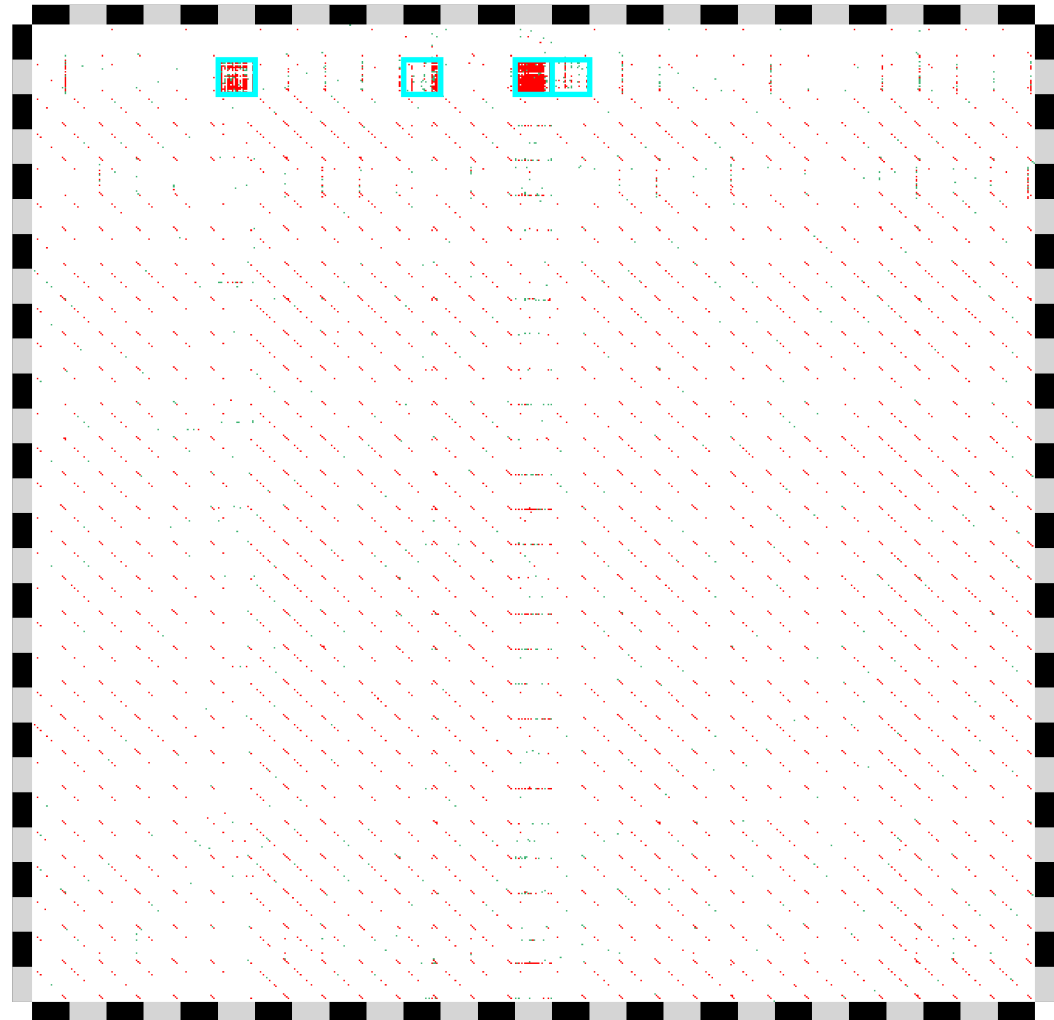

LM→AL pairs

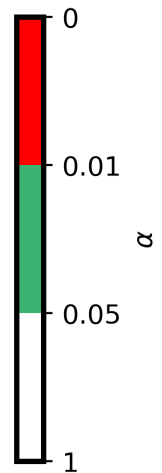

Supplement: supplementary_material [file attachment]

**A**

Source neuron

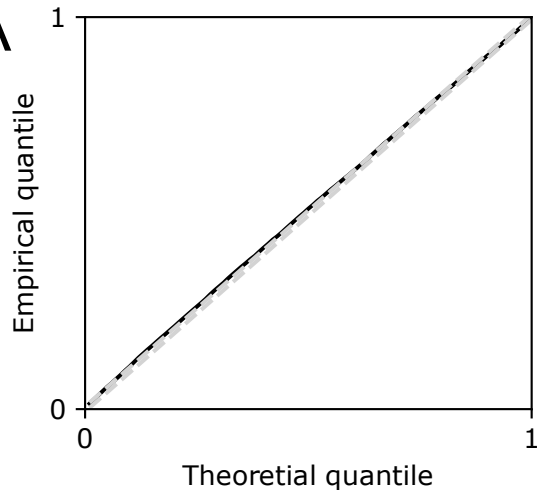**B**

Target neuron

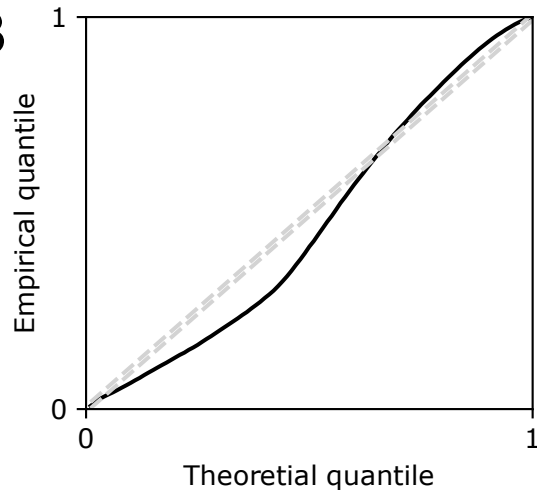**C**

Source + target neuron

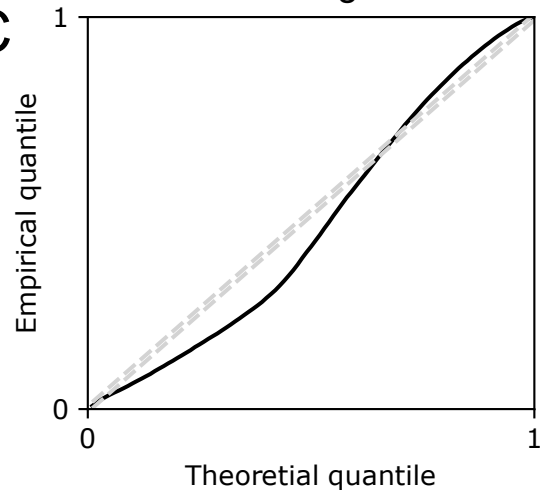

Supplement: supplementary_material [file attachment]

Group portions: 0.15, 0.25, 0.2, 0.2, 0.2

A

V1→LM pairs

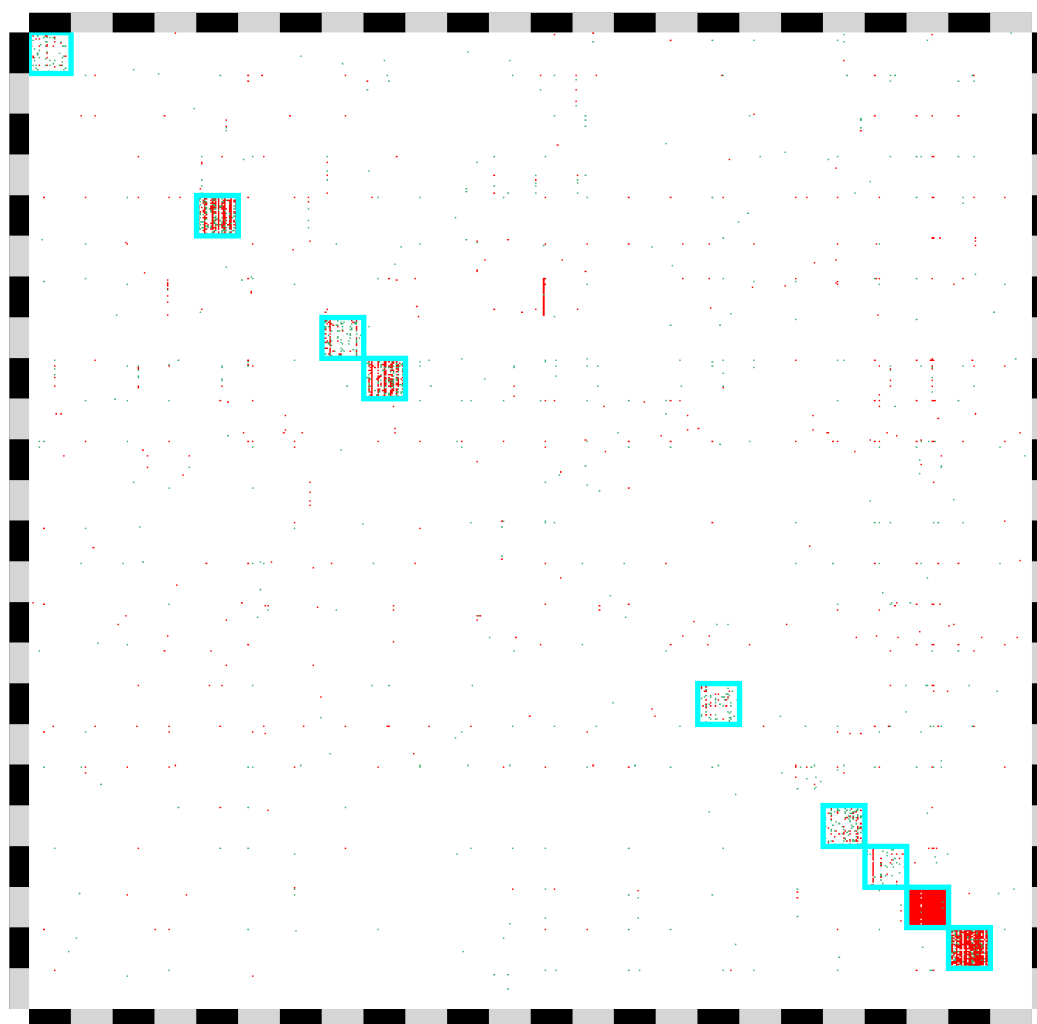

B

V1→LM pairs

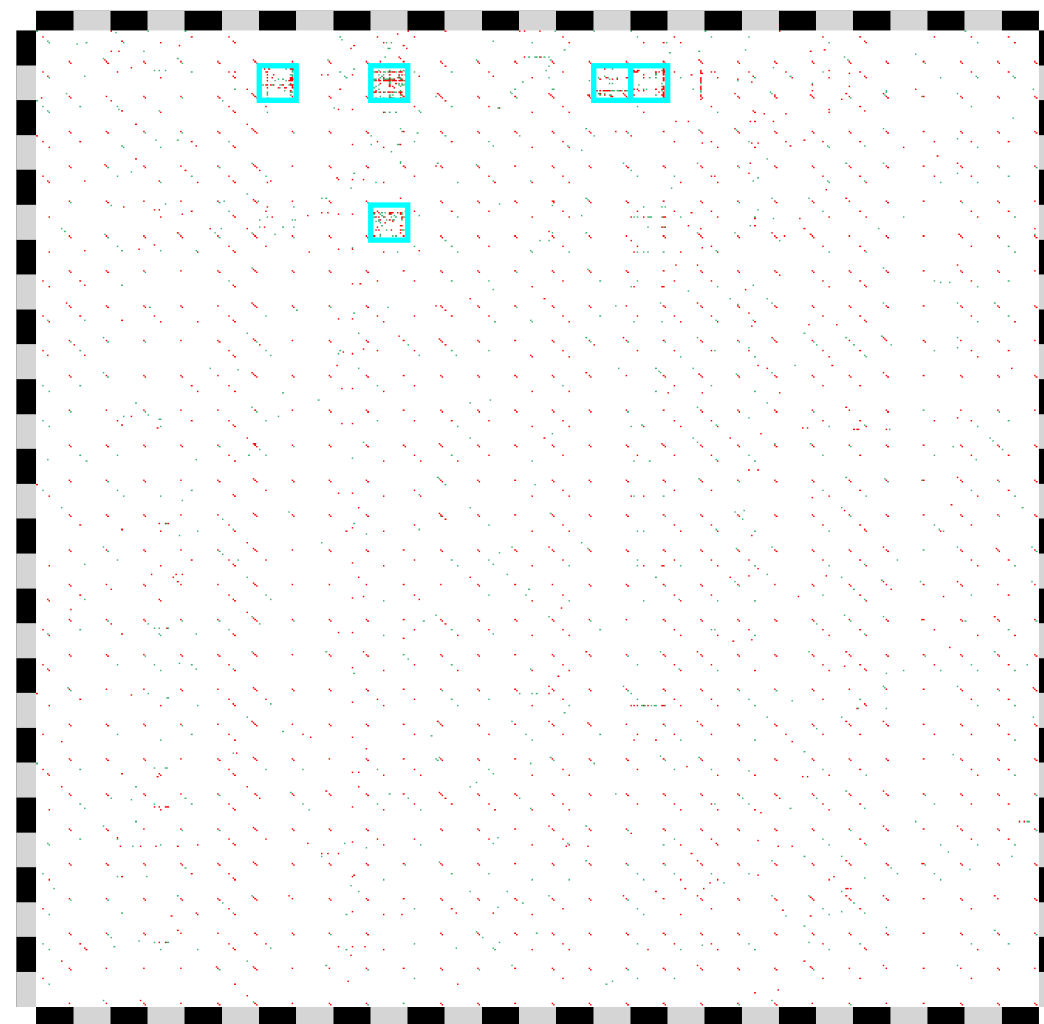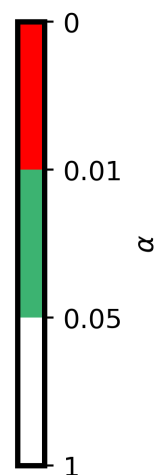

Group portions: 0.15, 0.2, 0.25, 0.2, 0.2

C

V1→LM pairs

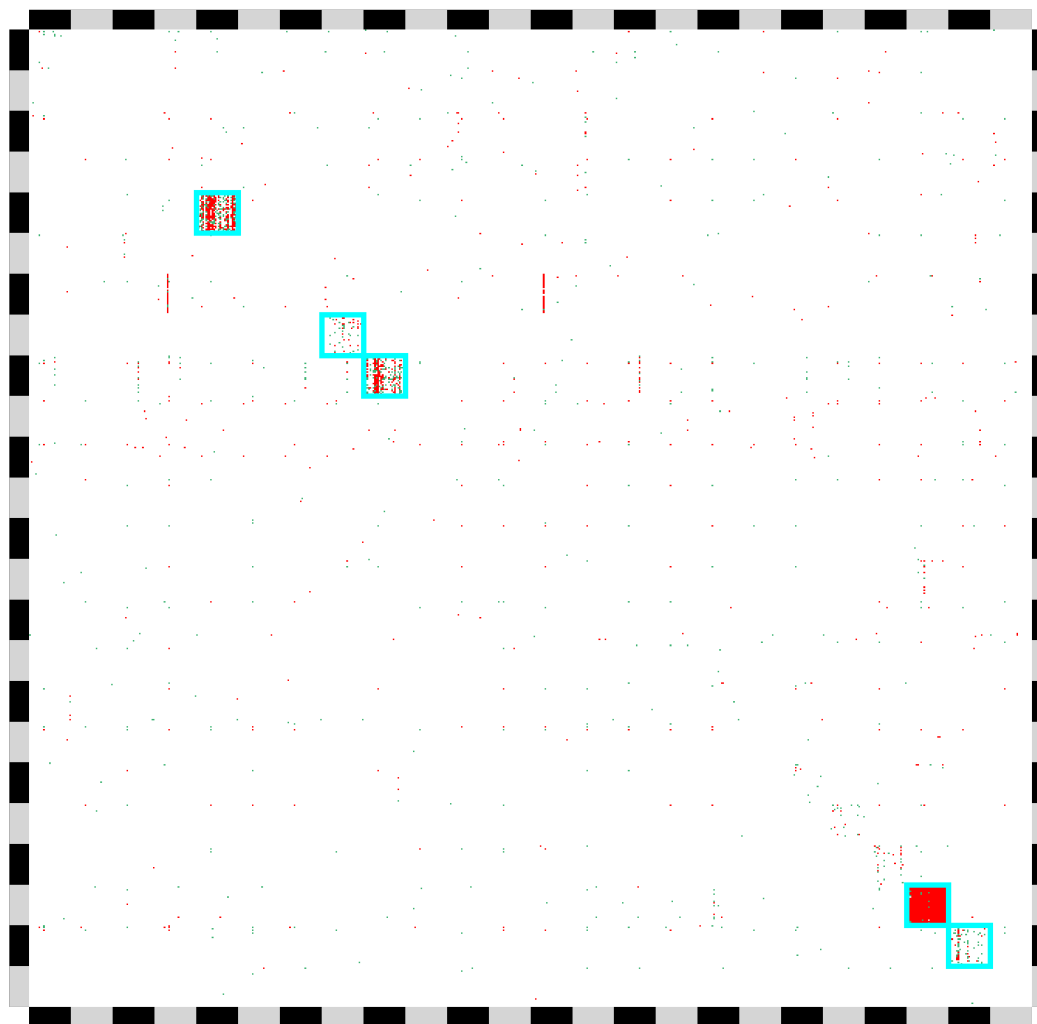

D

V1→LM pairs

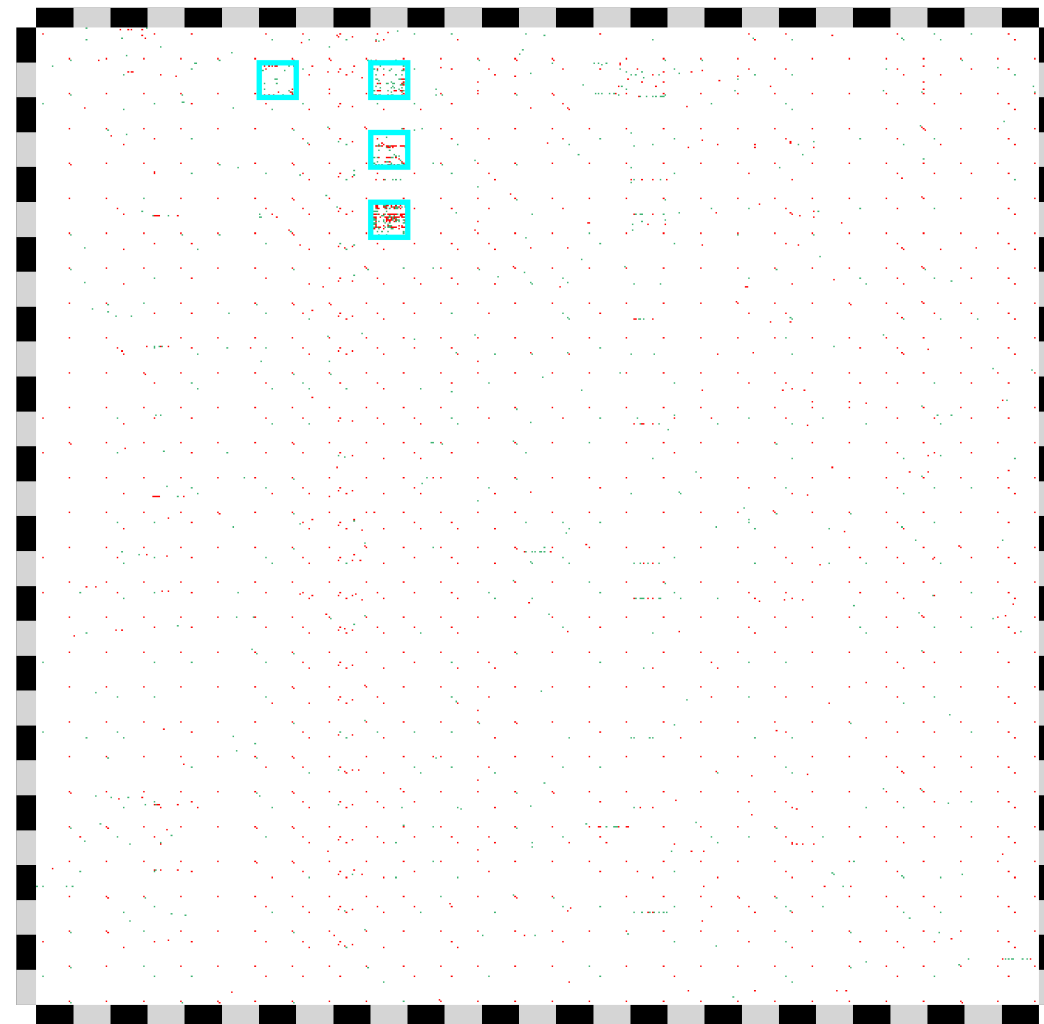

Supplement: supplementary_material [file attachment]

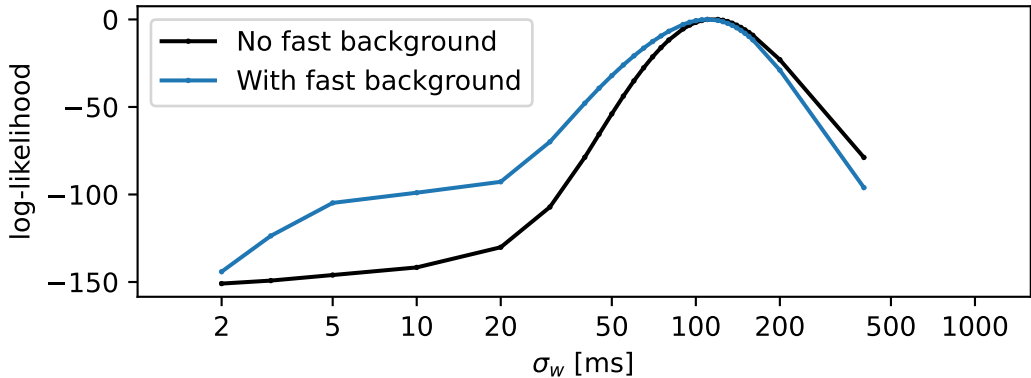

Supplement: supplementary_material [file attachment]

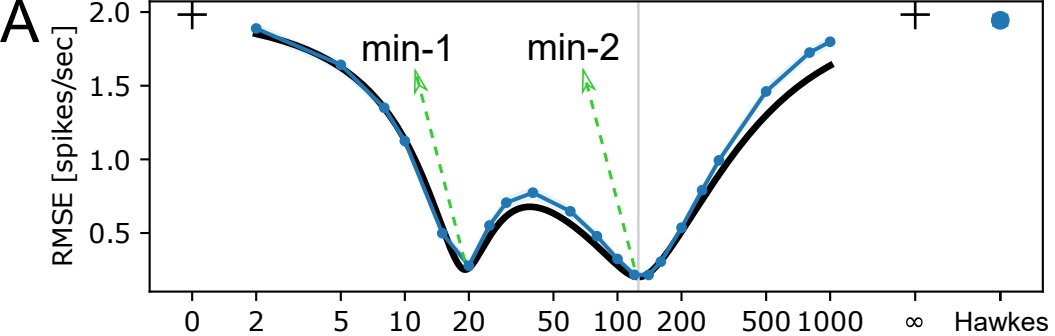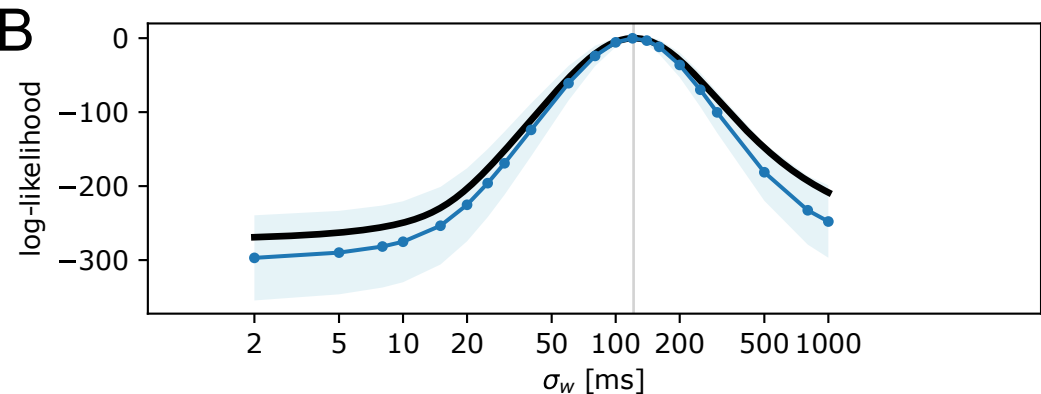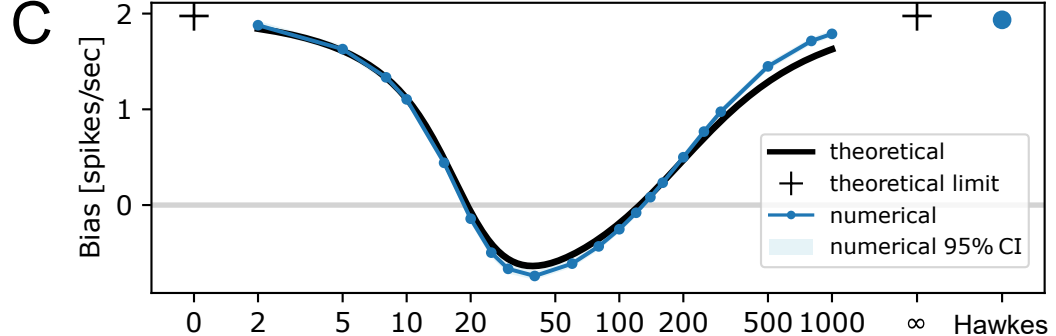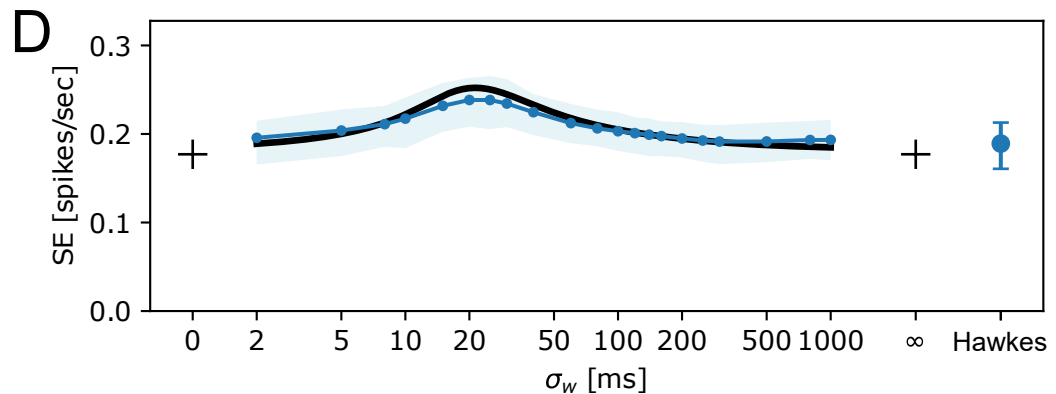

Supplement: supplementary_material [file attachment]

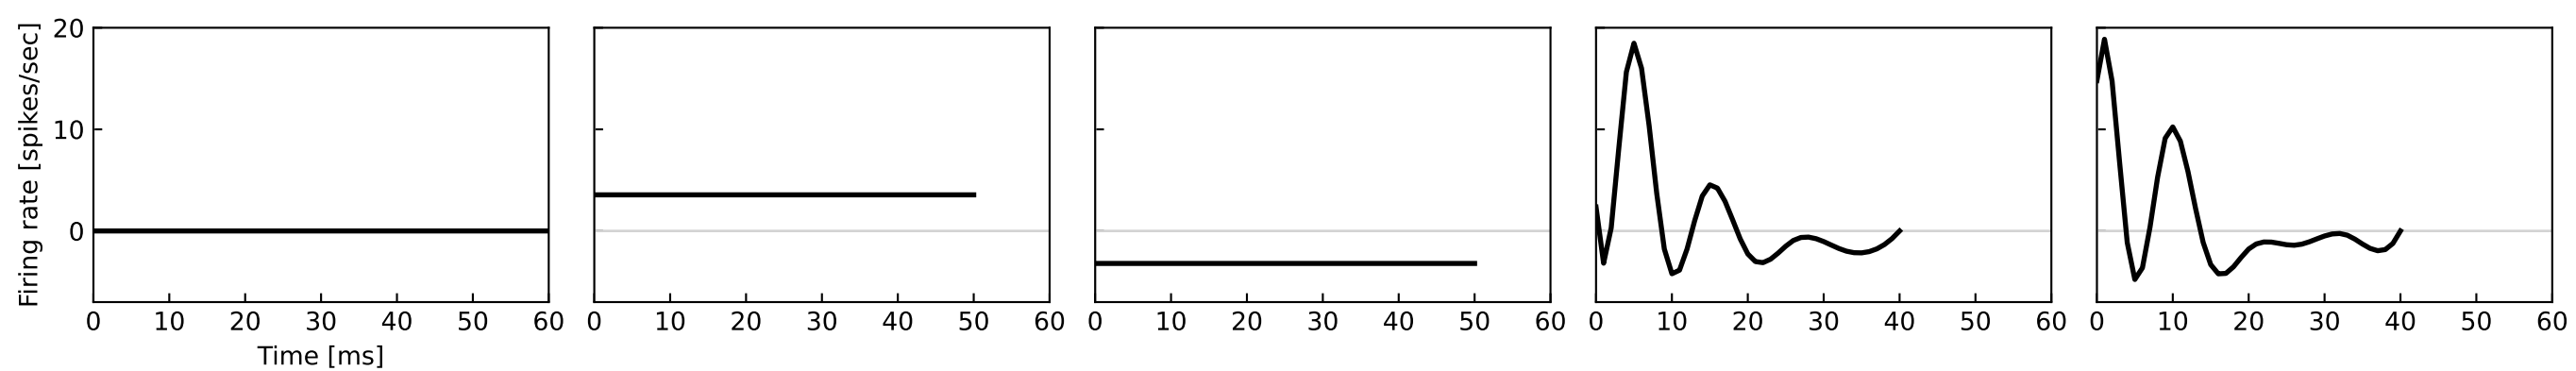

Supplement: supplementary_material [file attachment]

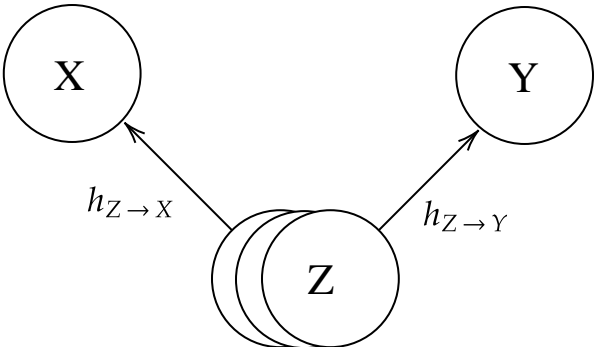

Supplement: supplementary_material [file attachment]

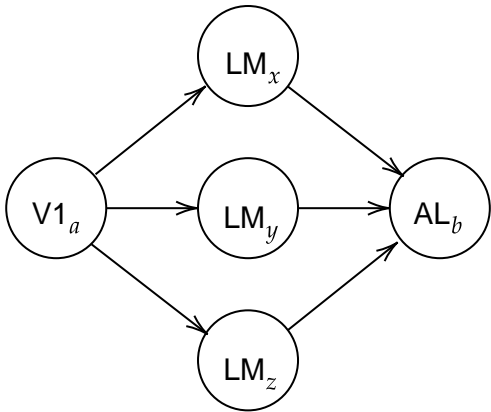

Supplement: supplementary_material [file attachment]

**A**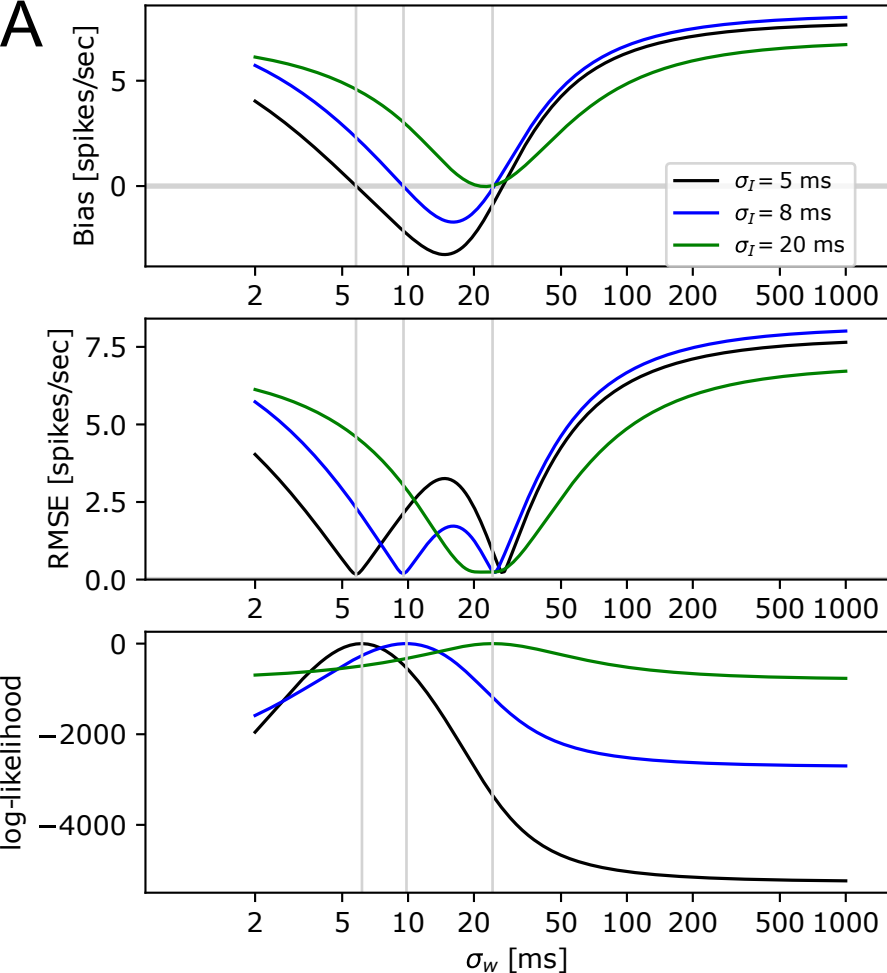**B**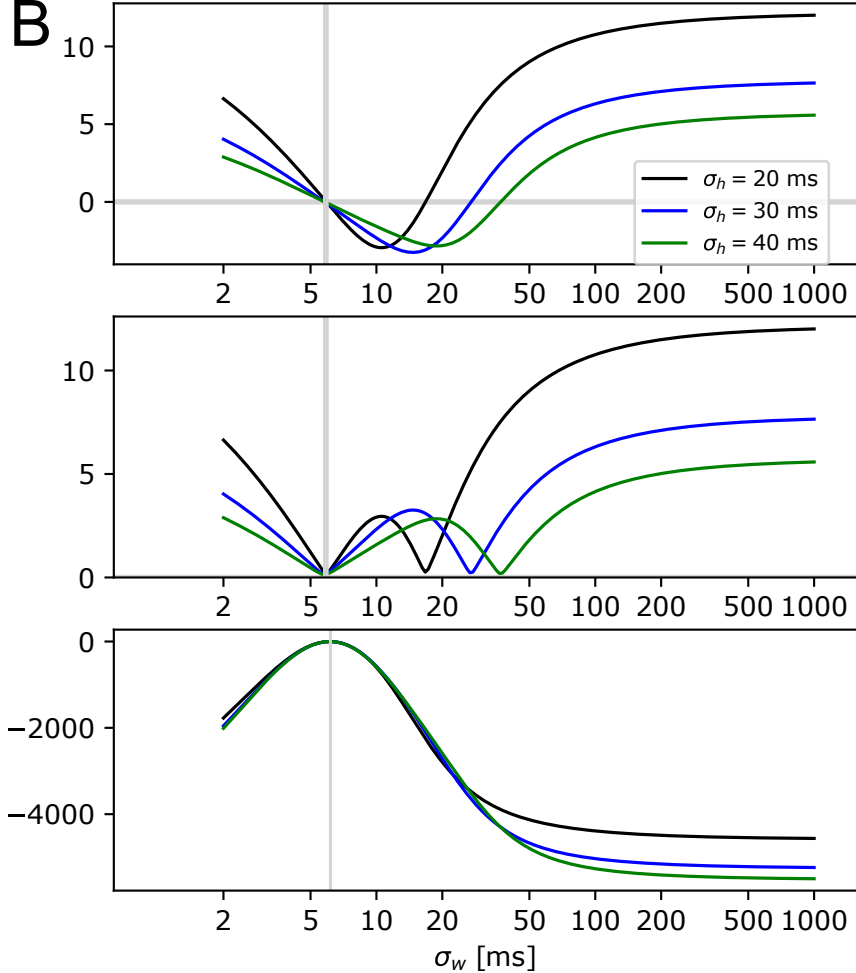**C**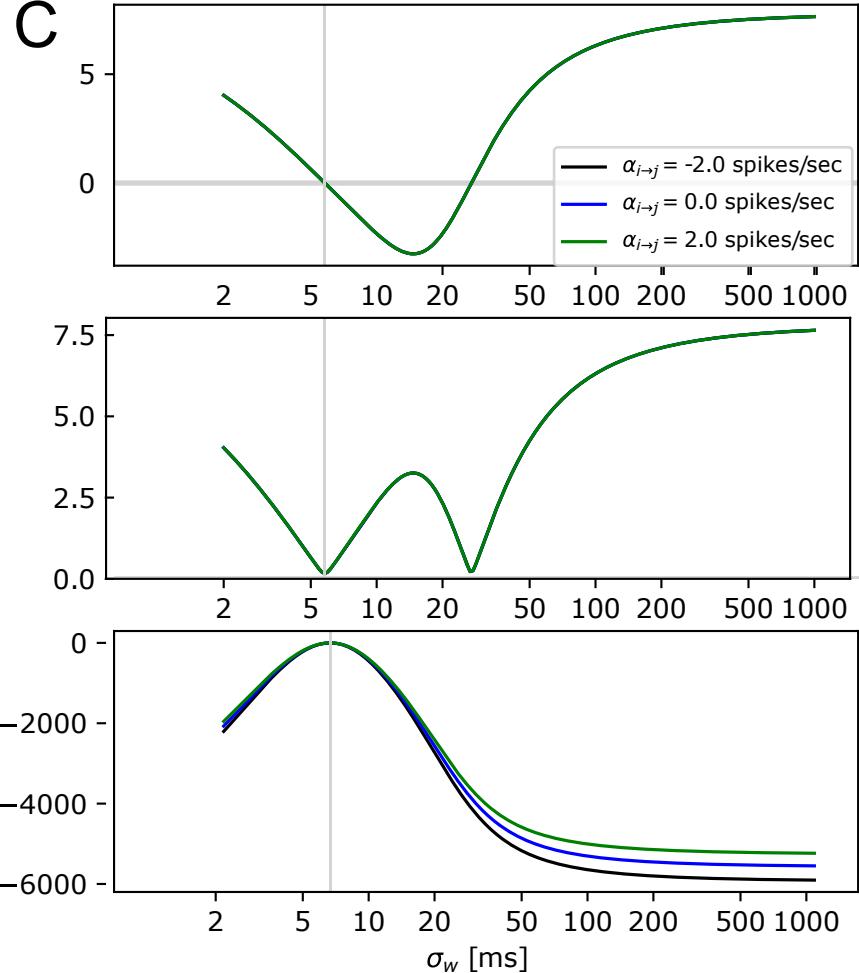

Supplement: supplementary_material [file attachment]

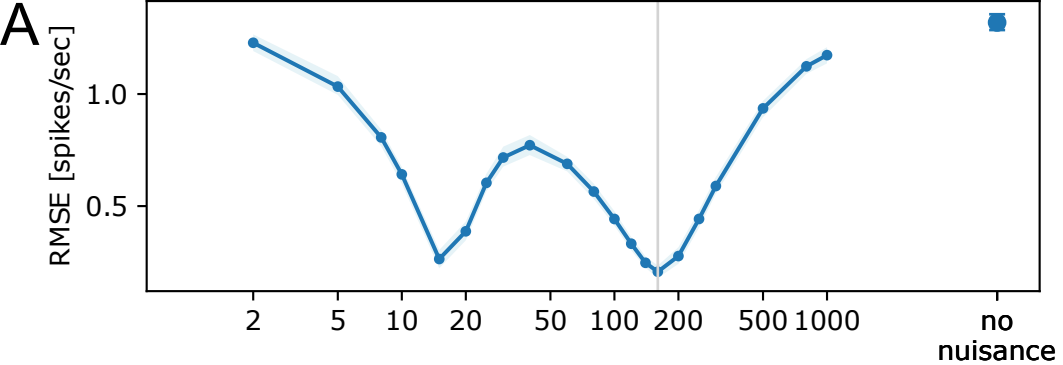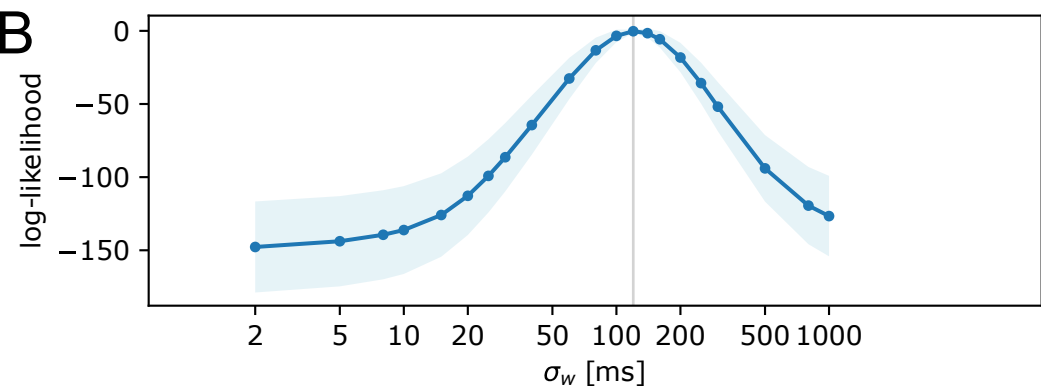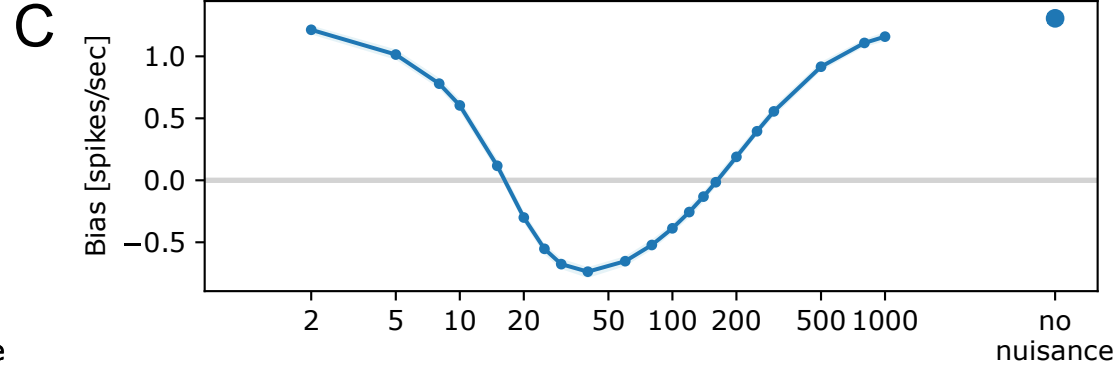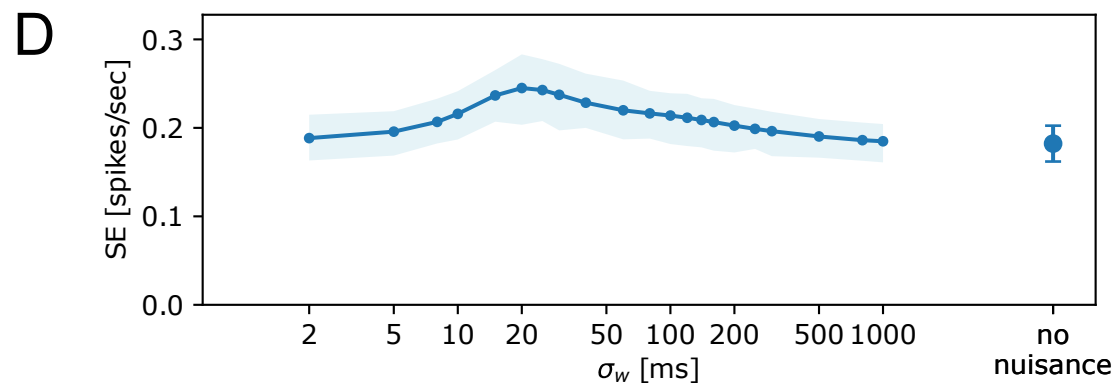

Supplement: supplementary_material [file attachment]

Timescale of the background = 20 ms

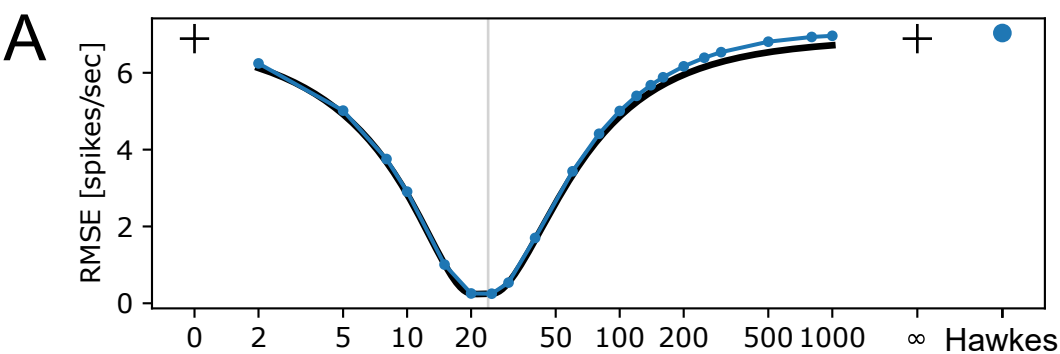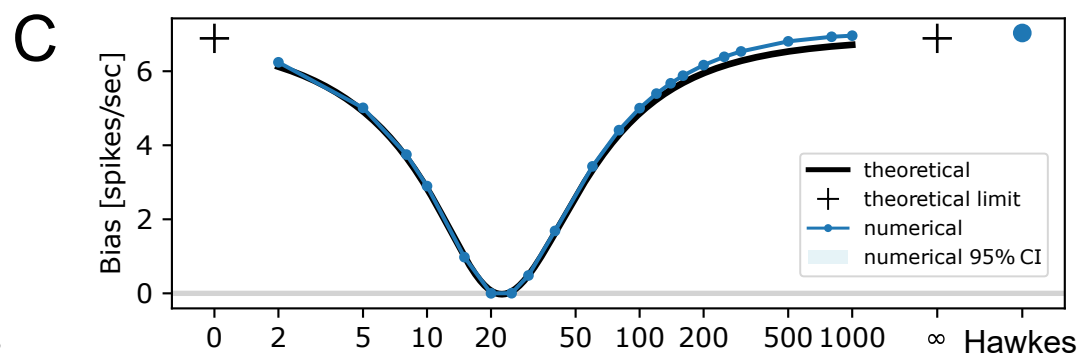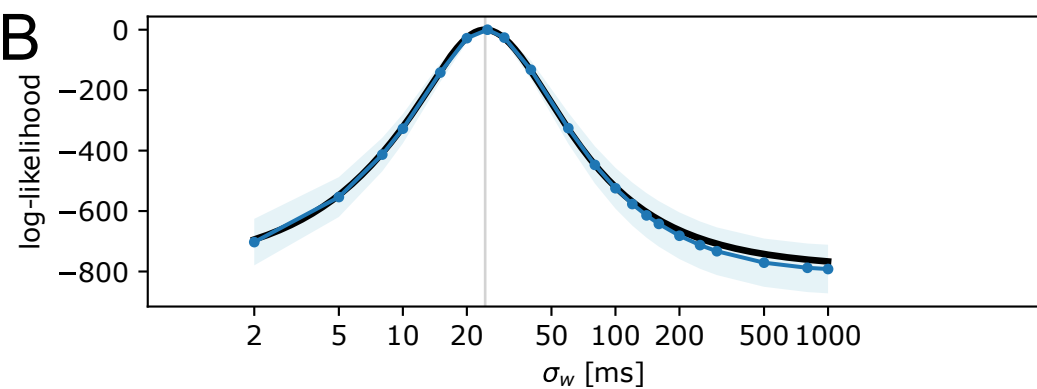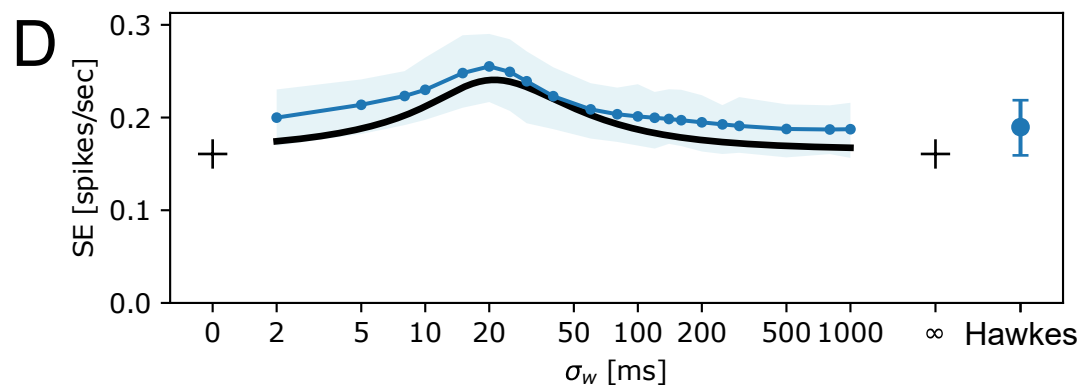

Timescale of the background = 8 ms

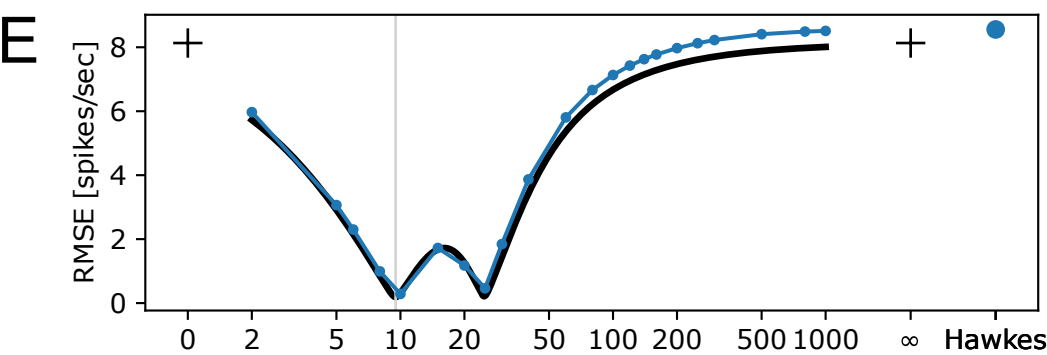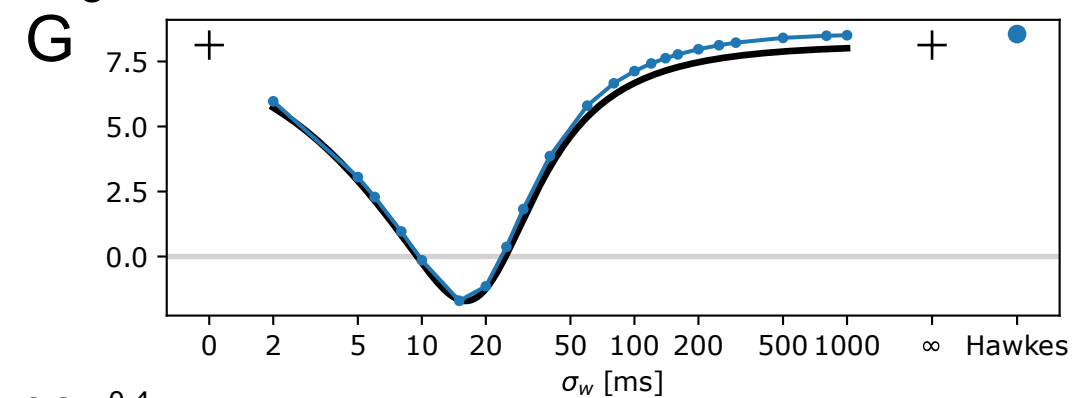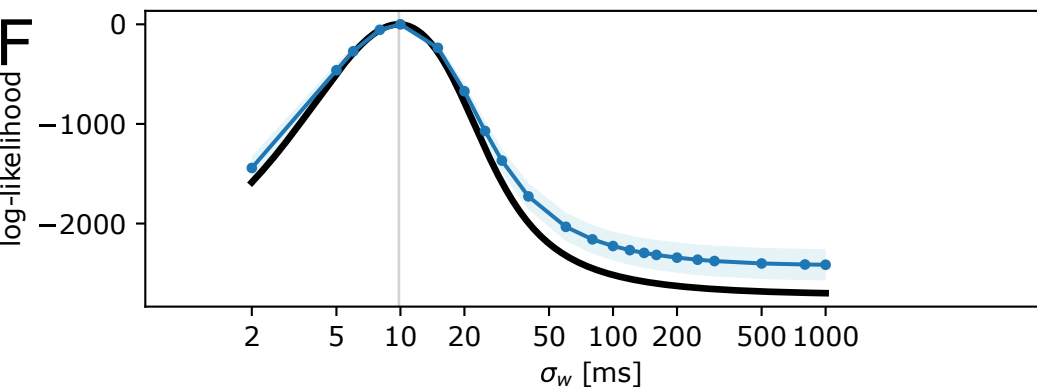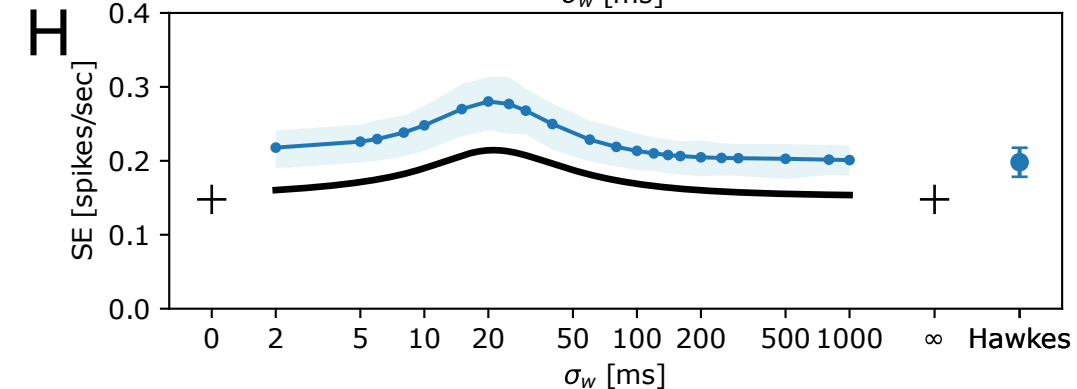

Supplement: supplementary_material [file attachment]

p-value under the null

Our model

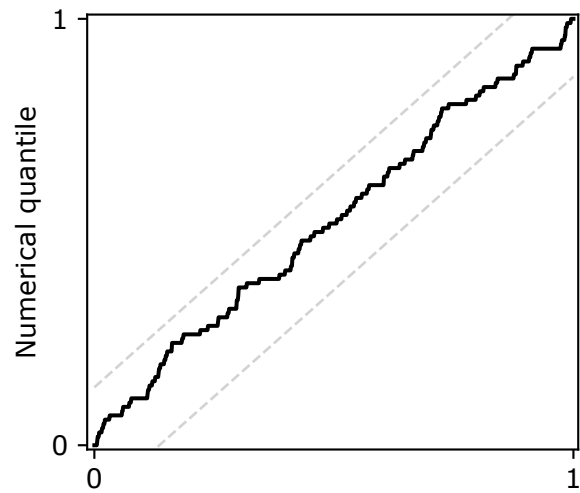

Conditional inference

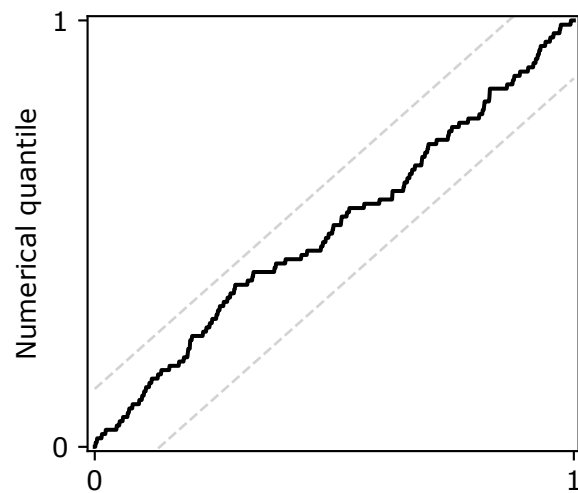

Typical Hawkes

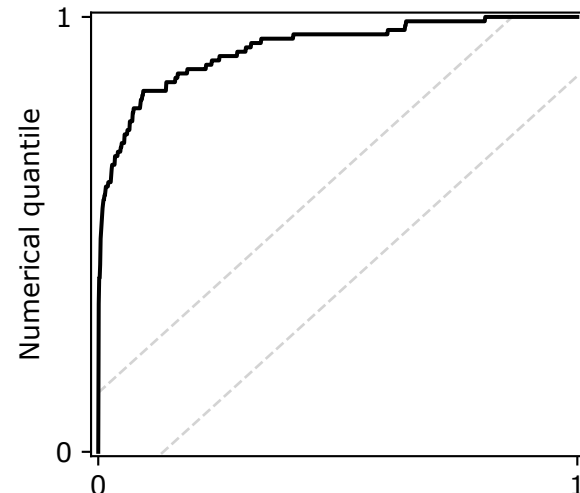

ROC curves

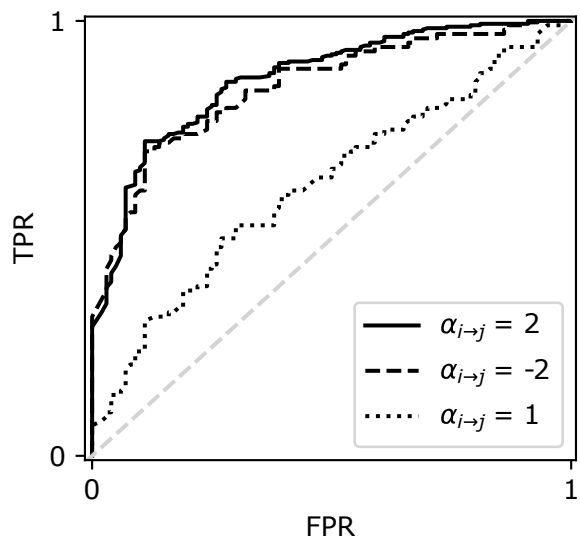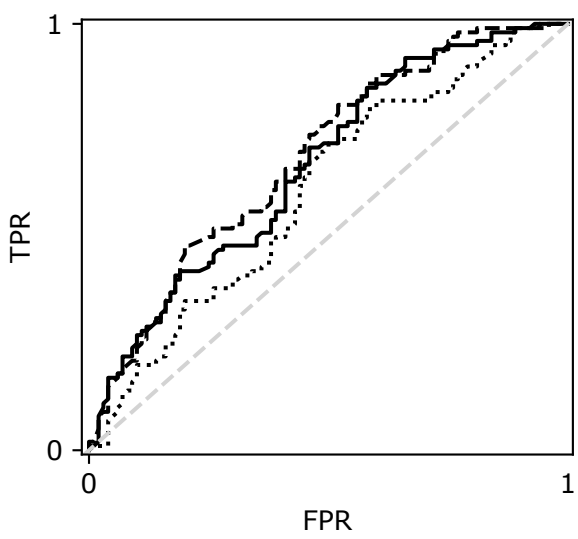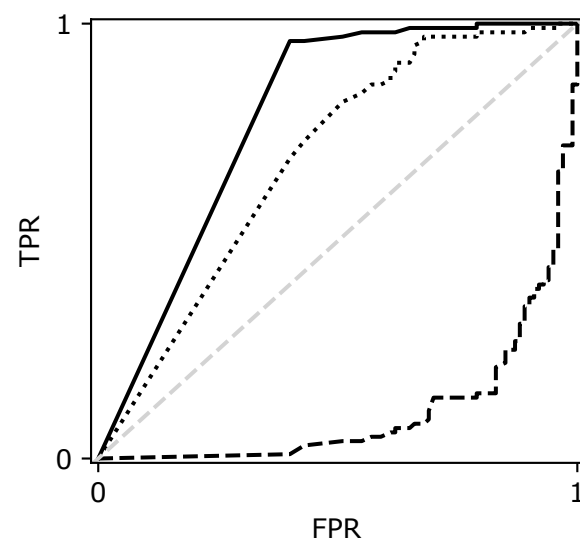

Supplement: supplementary_material [file attachment]

**A** Average activities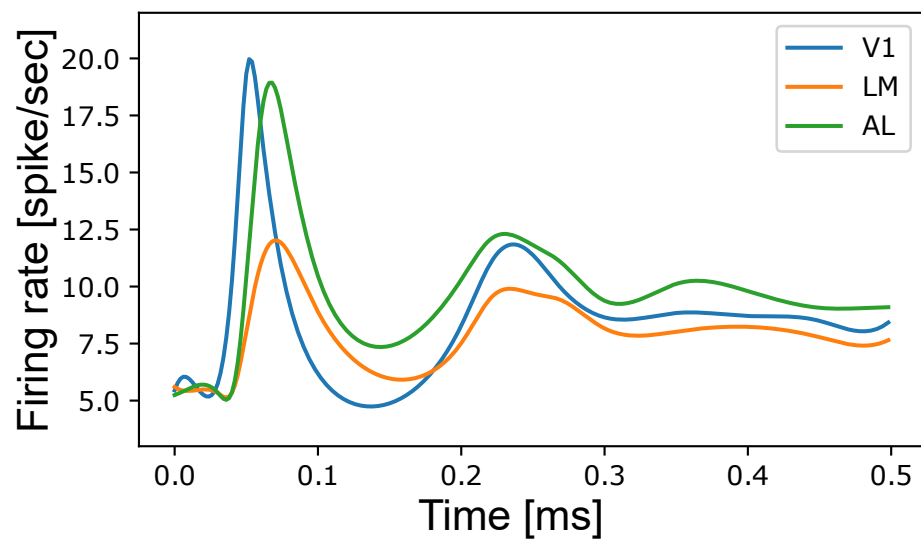**B** Conditional inference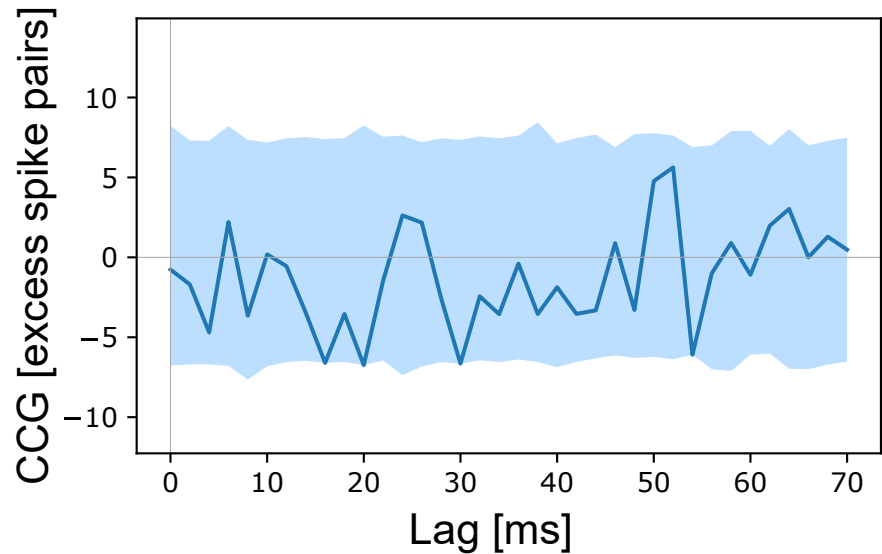**C** Hawkes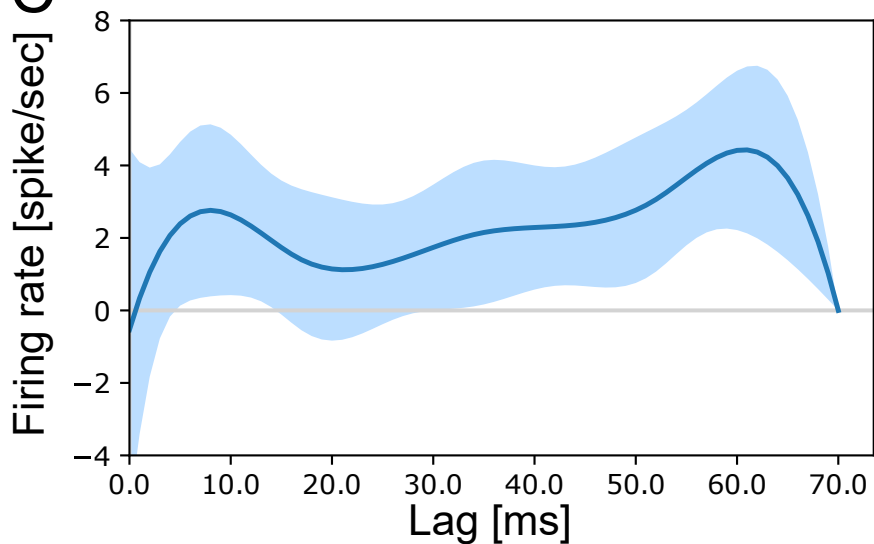**D** Our model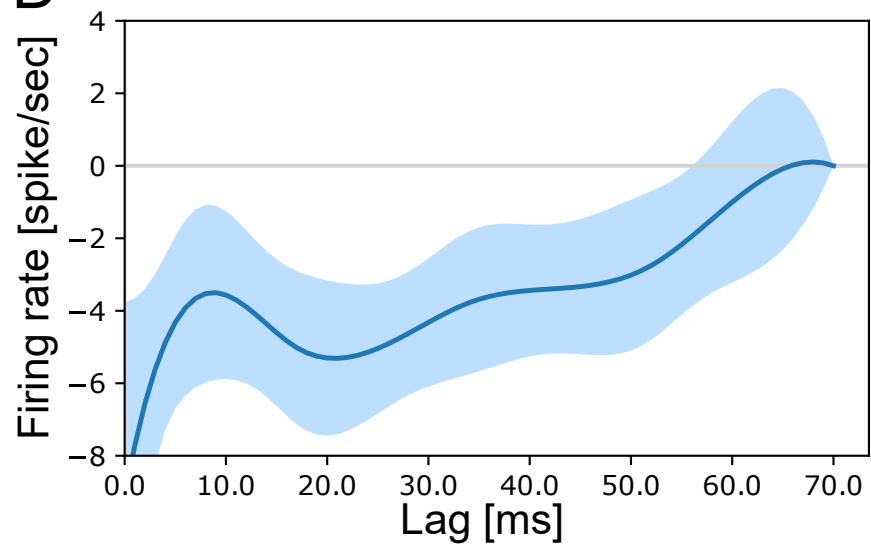

Supplement: supplementary_material [file attachment]

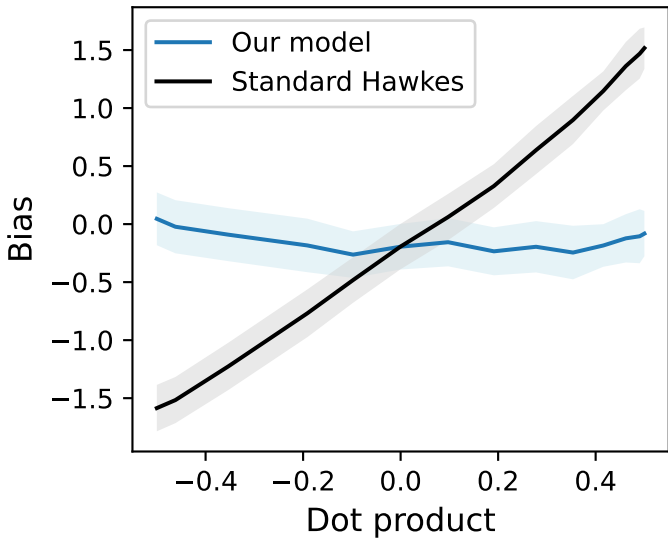

Supplement: supplementary_material [file attachment]

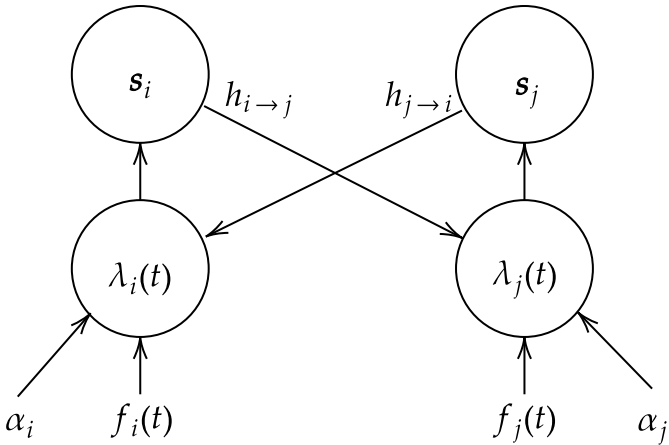

Supplement: supplementary_material [file attachment]

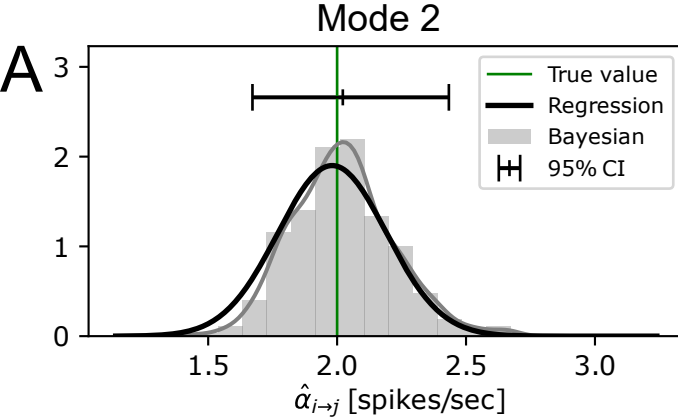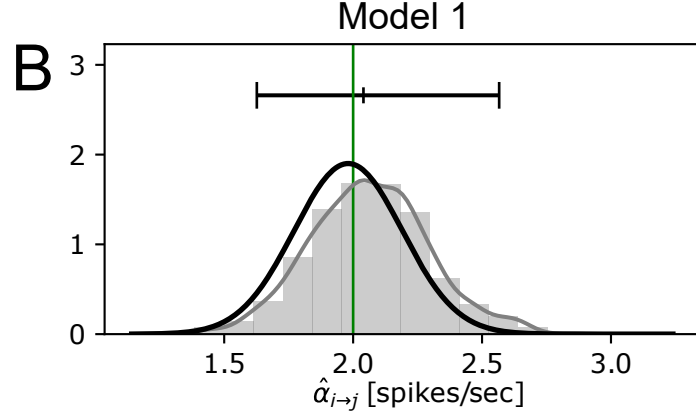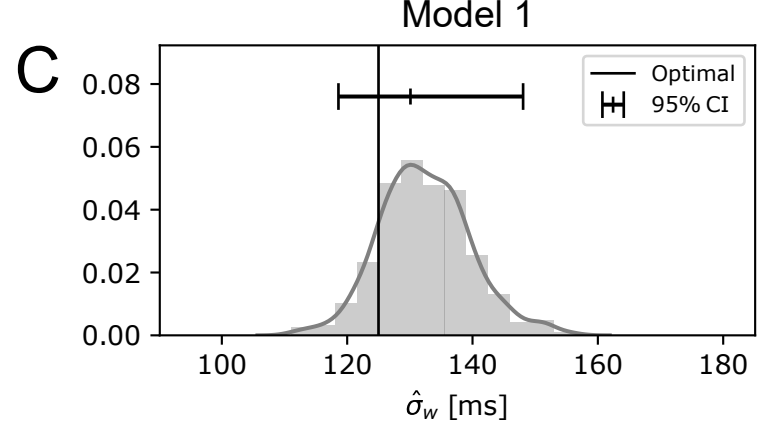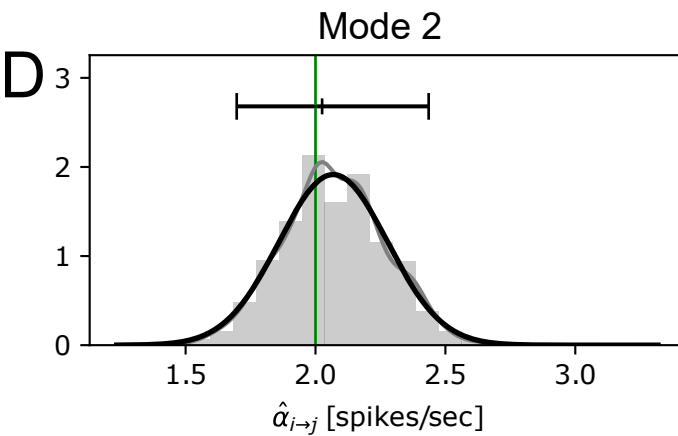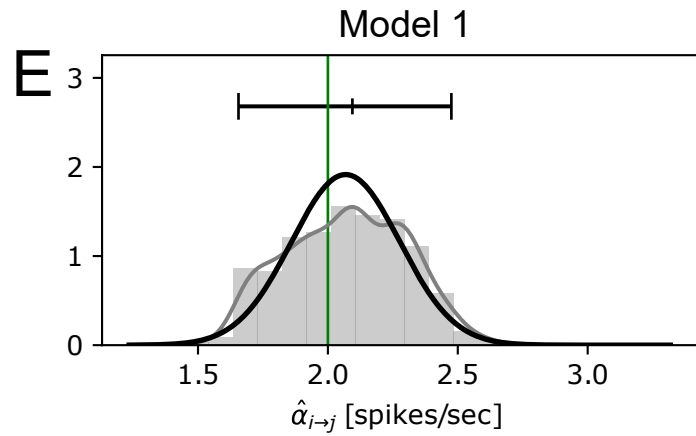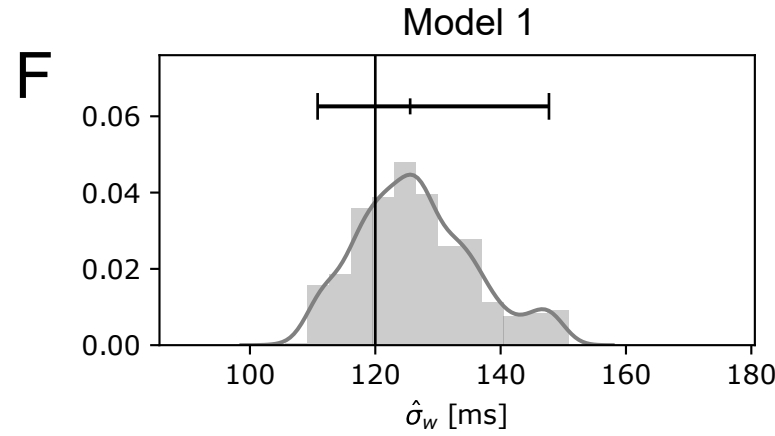

Supplement: supplementary_material [file attachment]

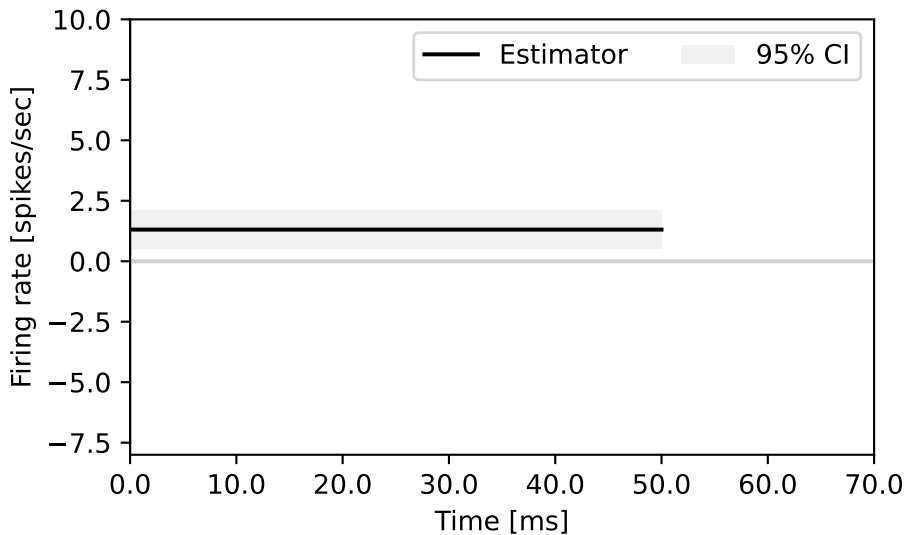

Supplement: supplementary_material [file attachment]

**A**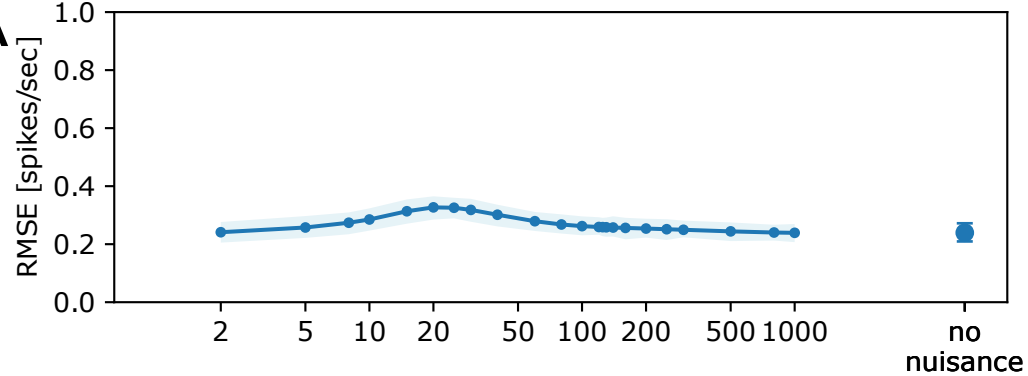**B**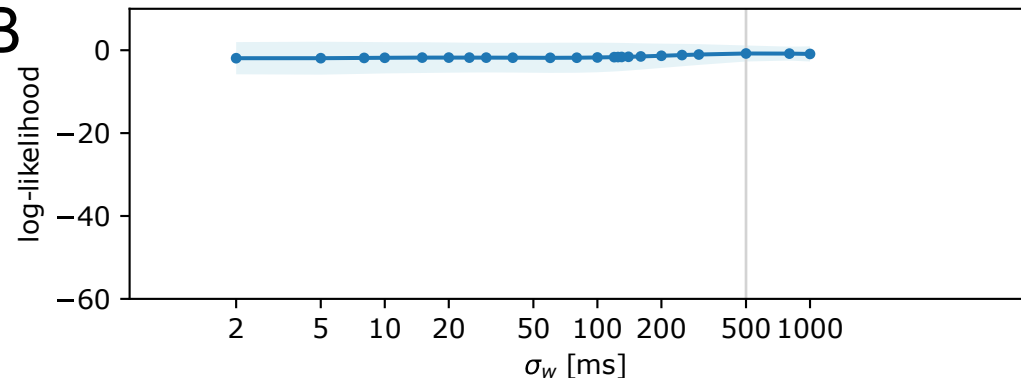**C**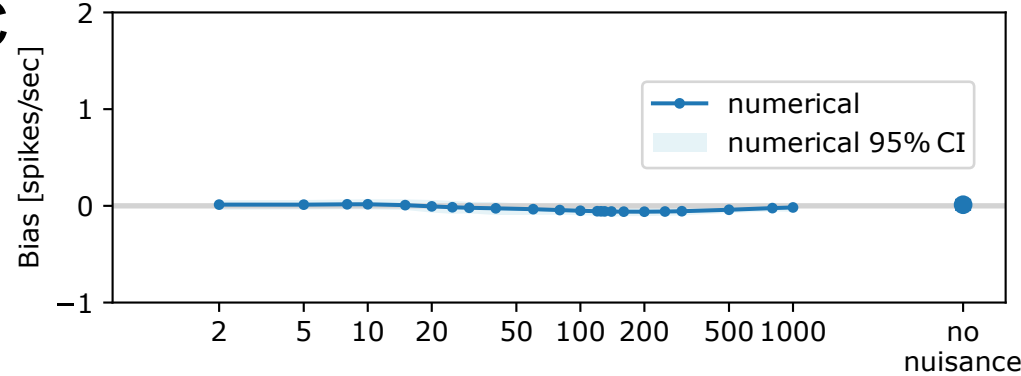**D**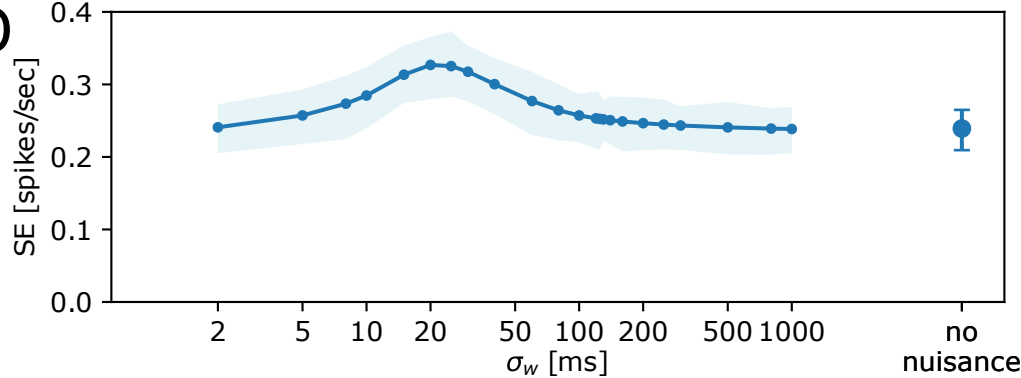

Supplement: supplementary_material [file attachment]

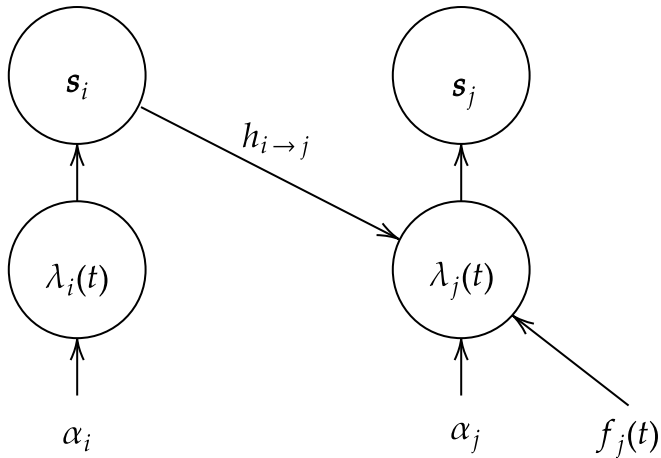

Supplement: supplementary_material [file attachment]

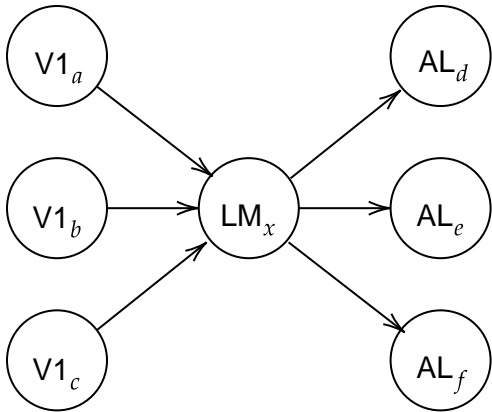

Supplement: supplementary_material [file attachment]

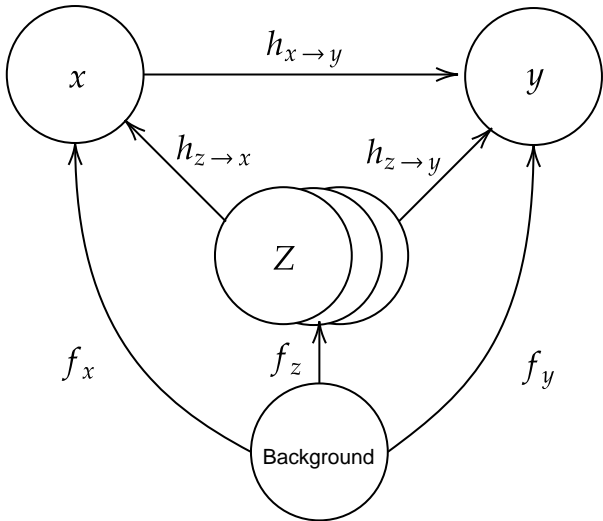

Supplement: supplementary_material [file attachment]

No significant effect

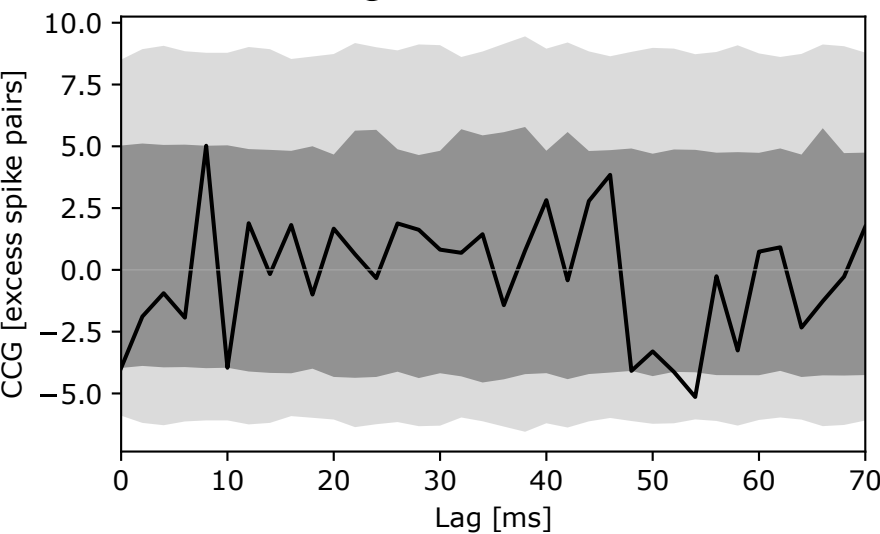

Excitatory

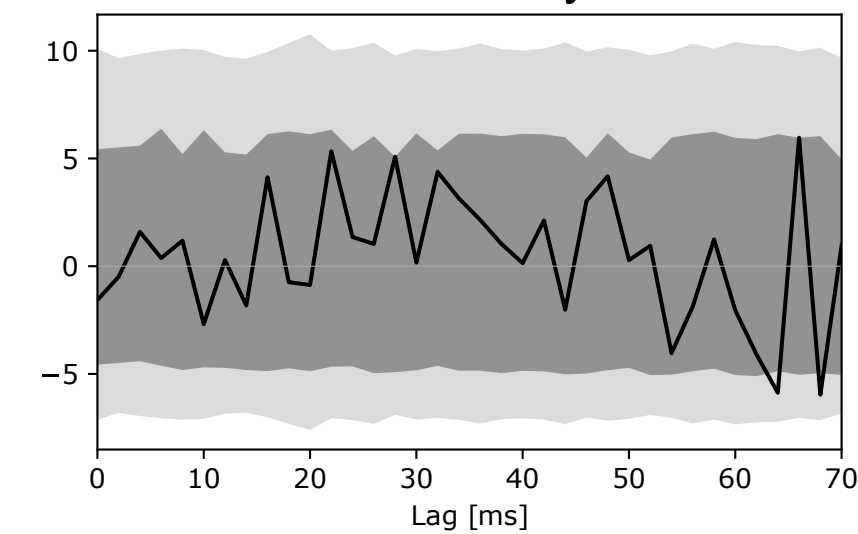

Inhibitory

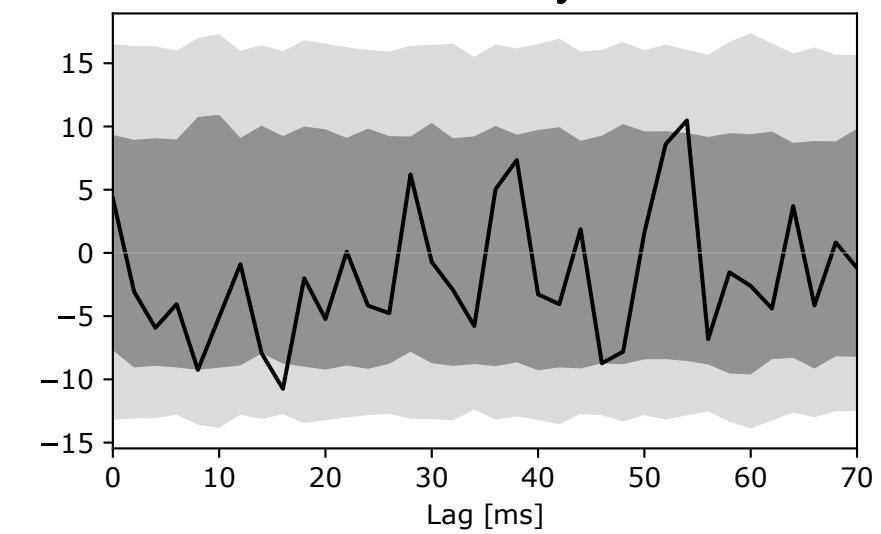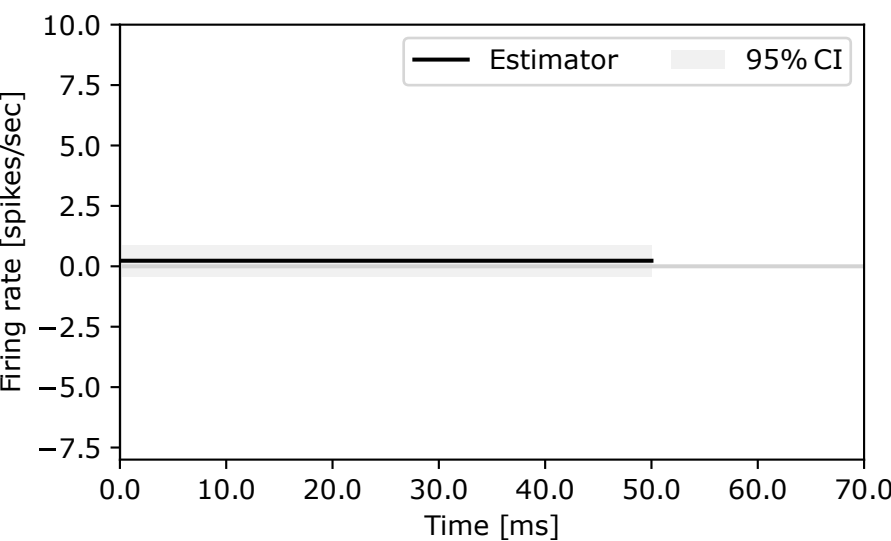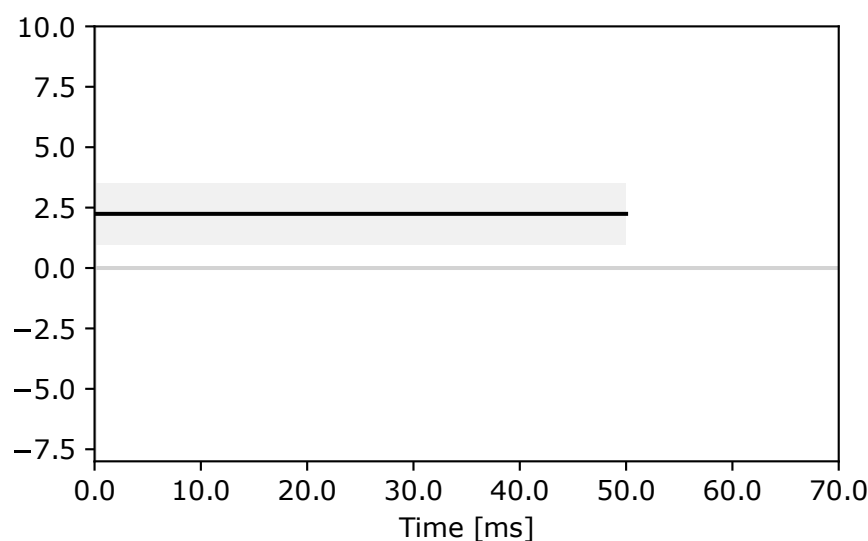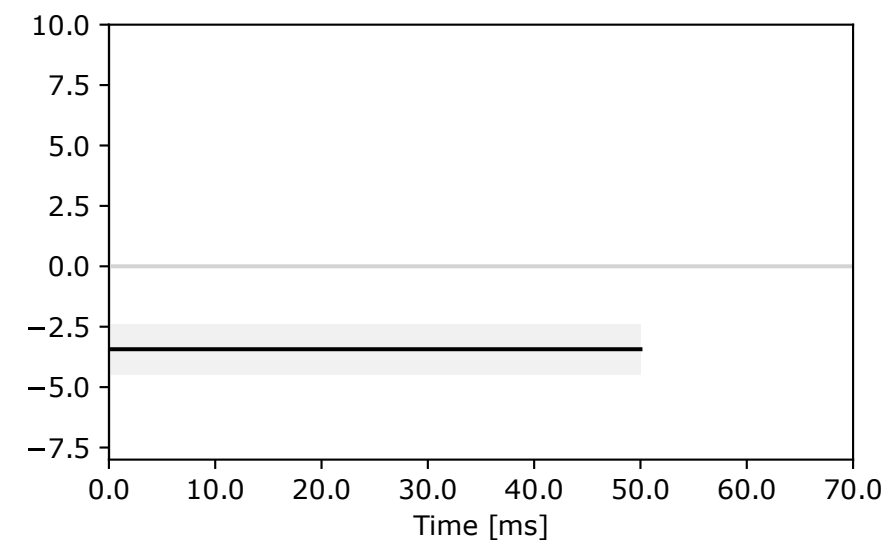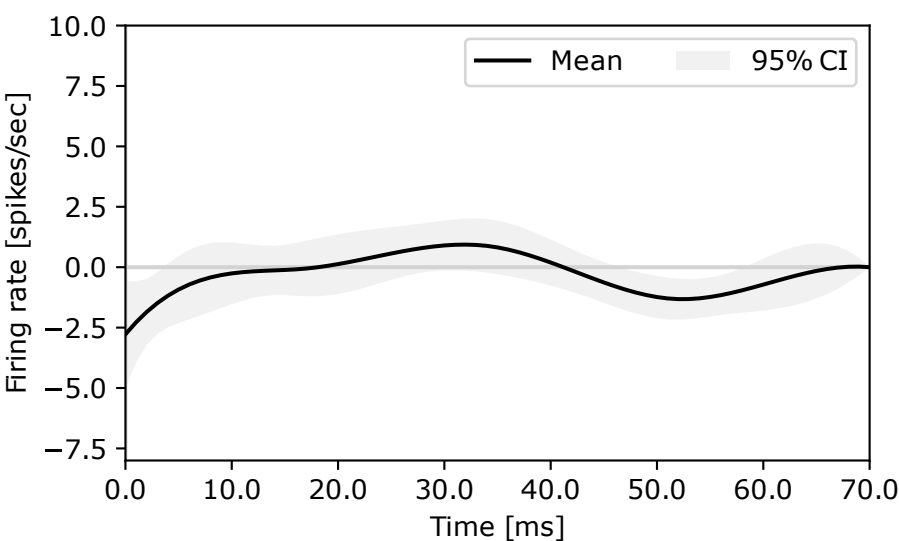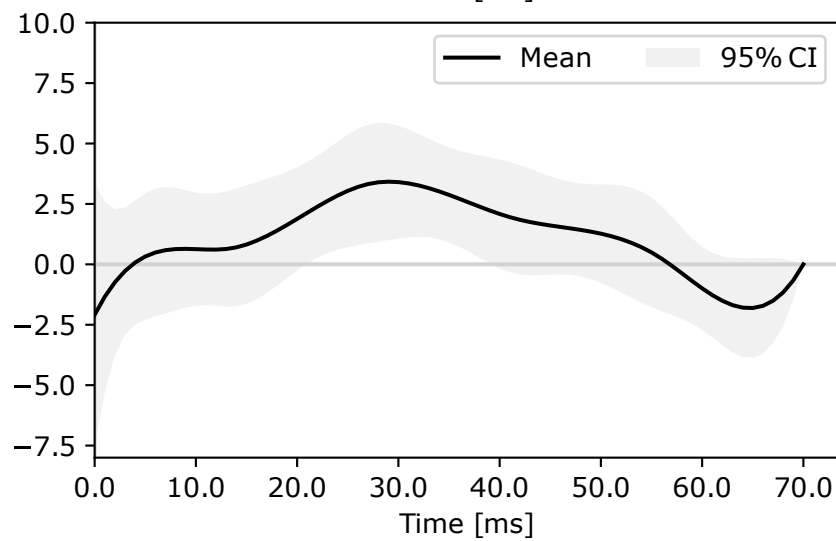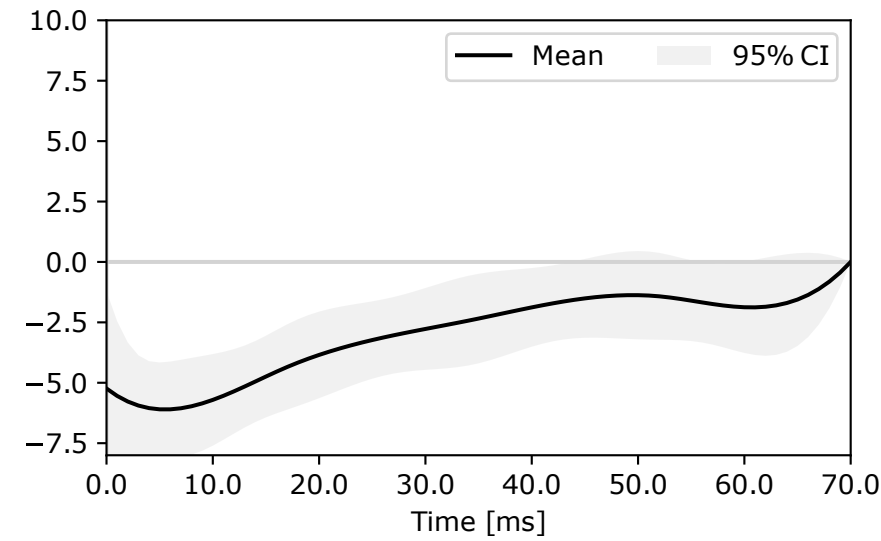

Supplement: supplementary_material [file attachment]

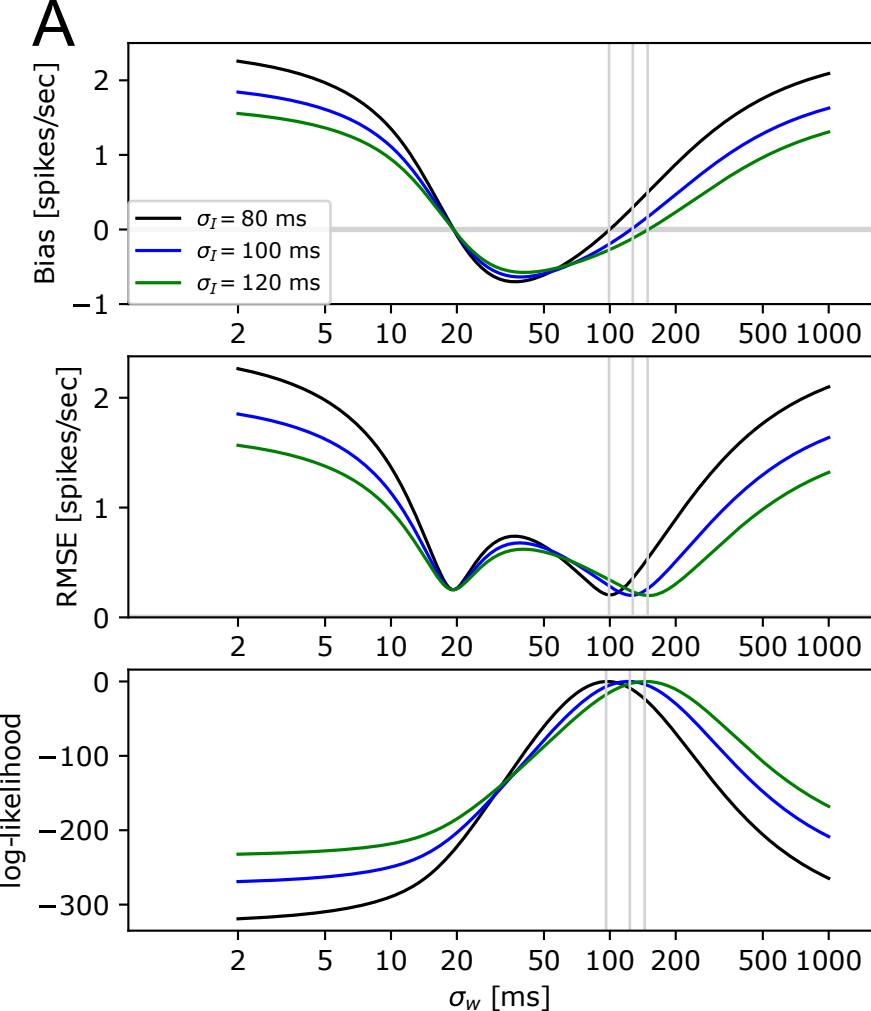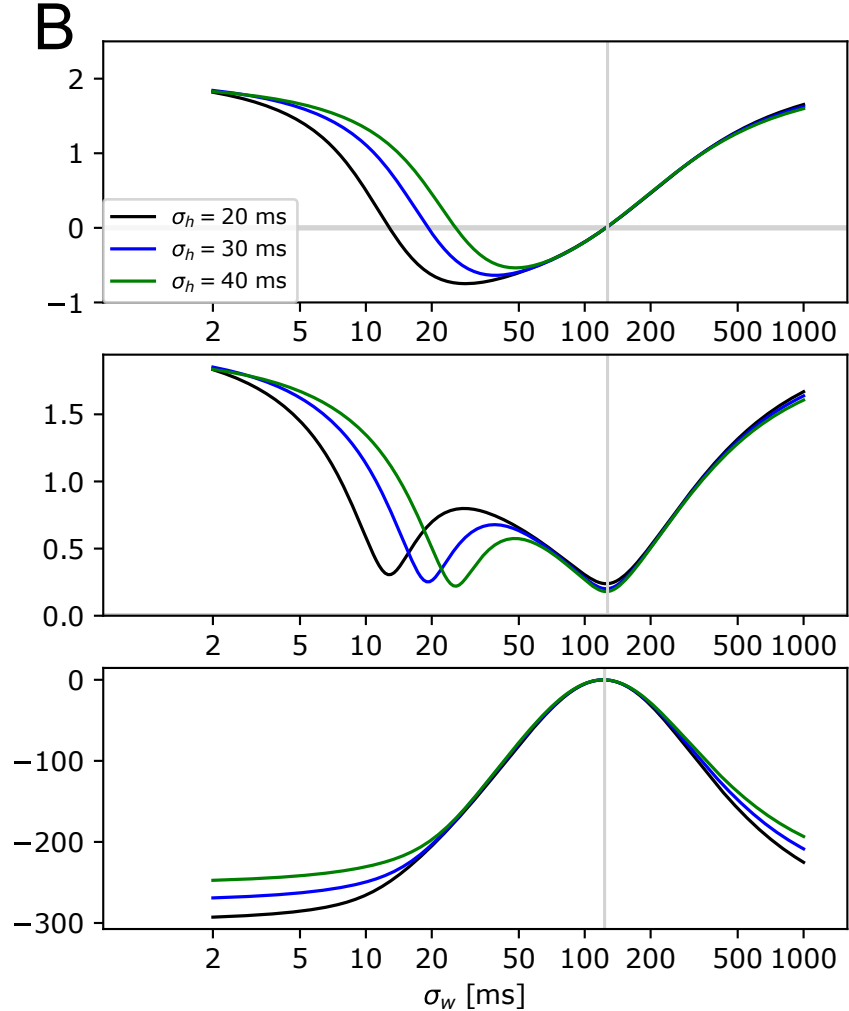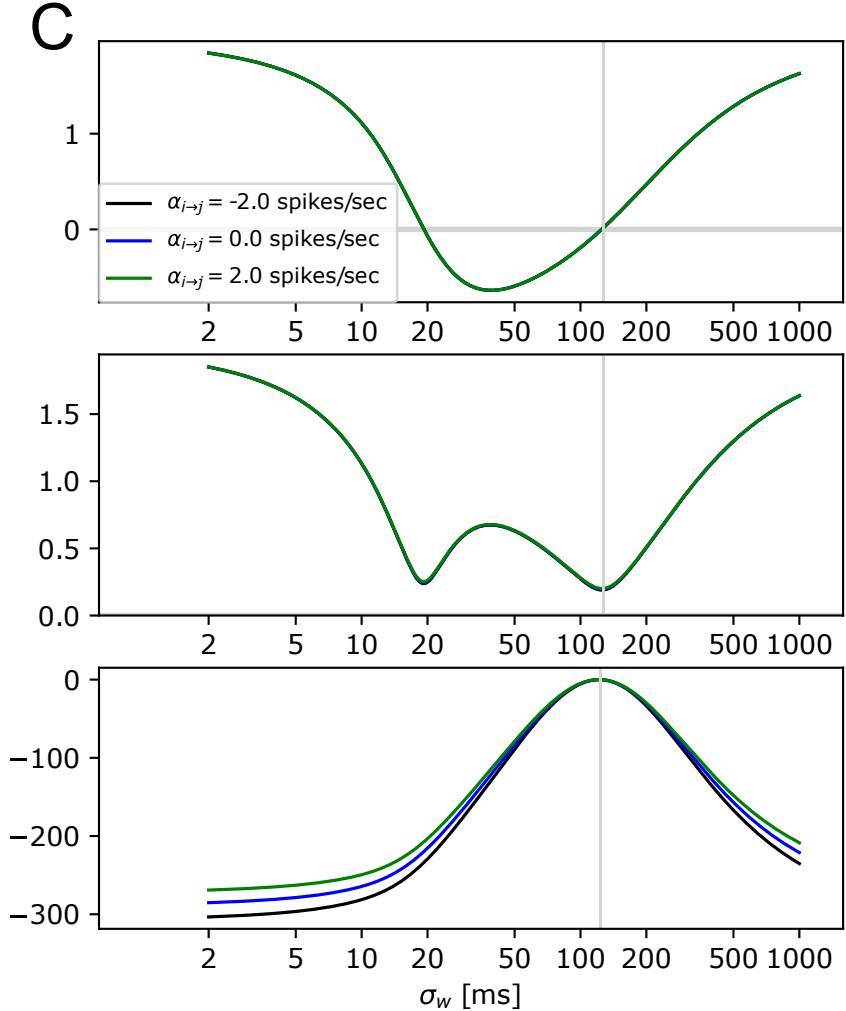

Supplement: supplementary_material [file attachment]

**A**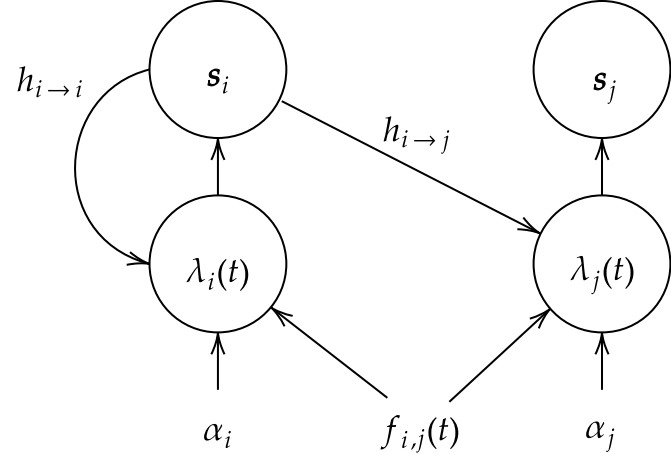**B**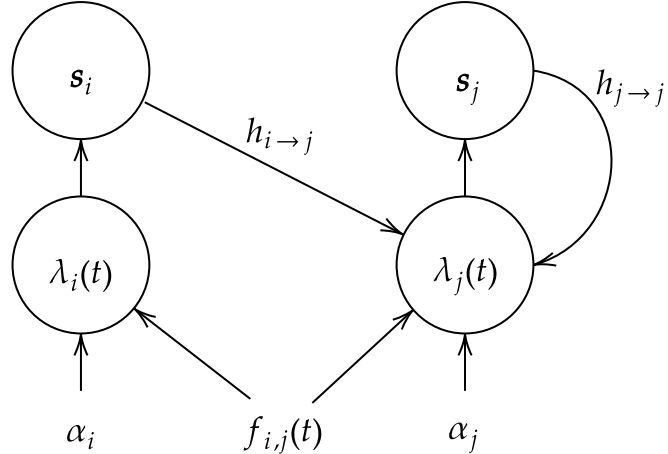**C**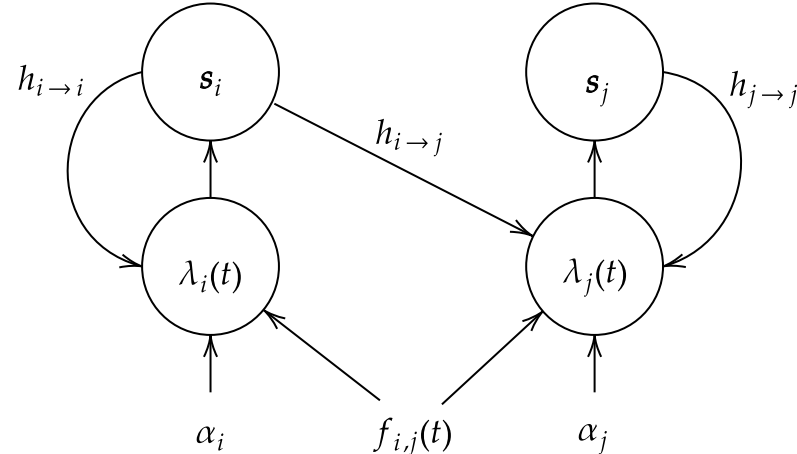

Supplement: supplementary_material [file attachment]

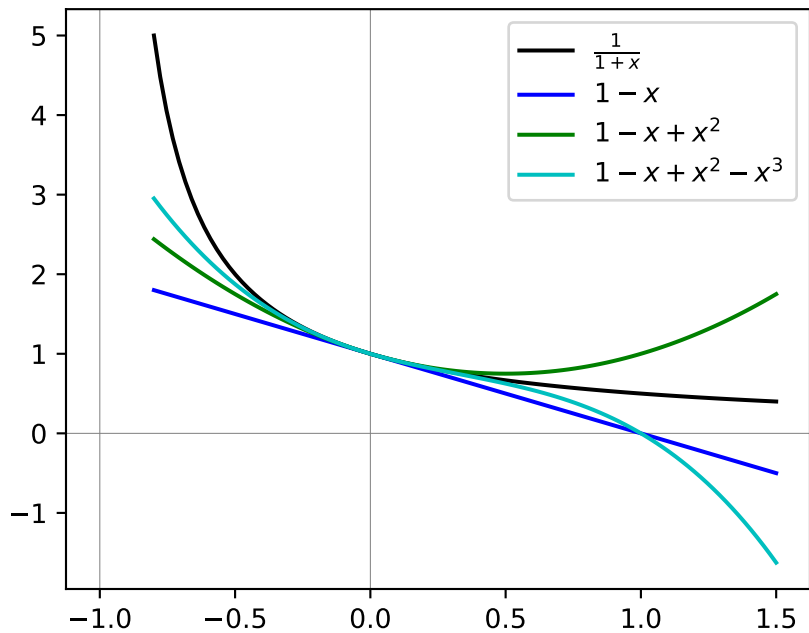

Supplement: supplementary_material [file attachment]

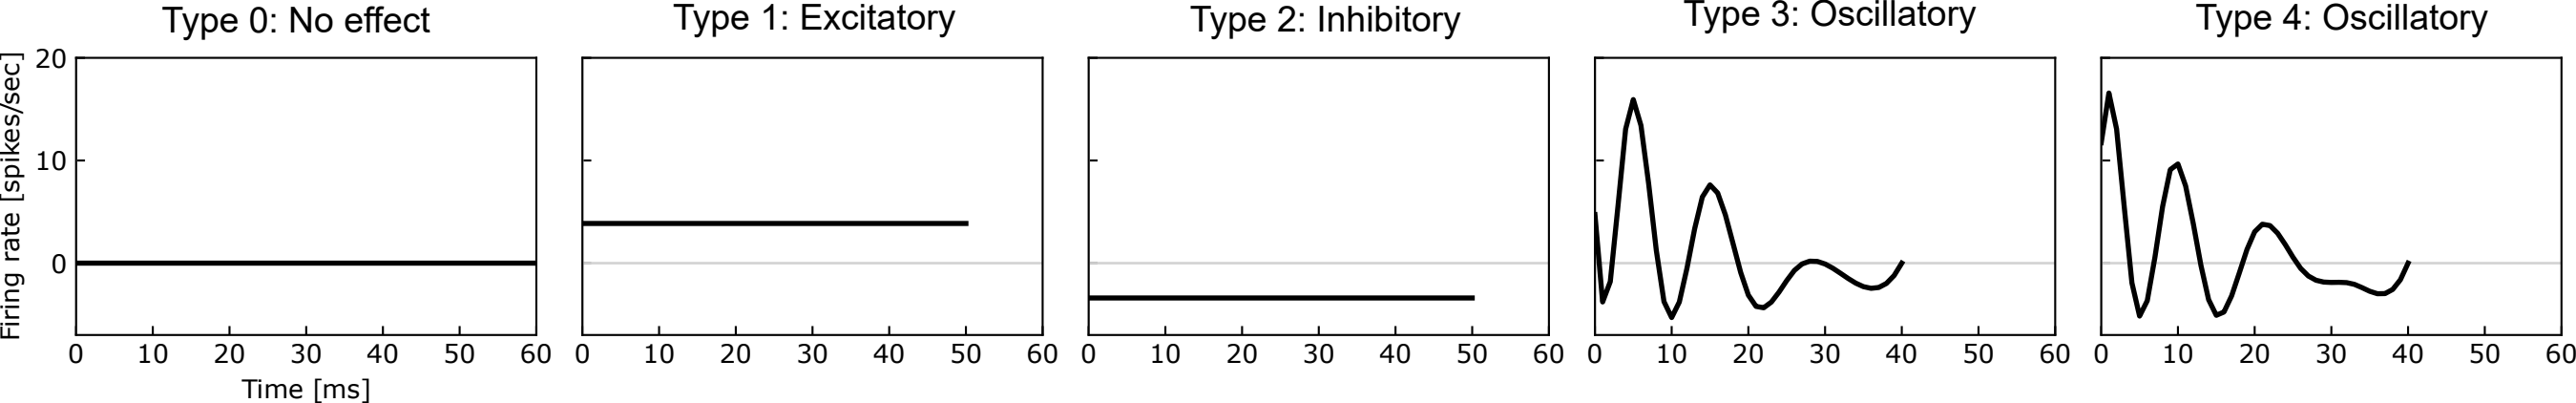

Supplement: supplementary_material [file attachment]

True

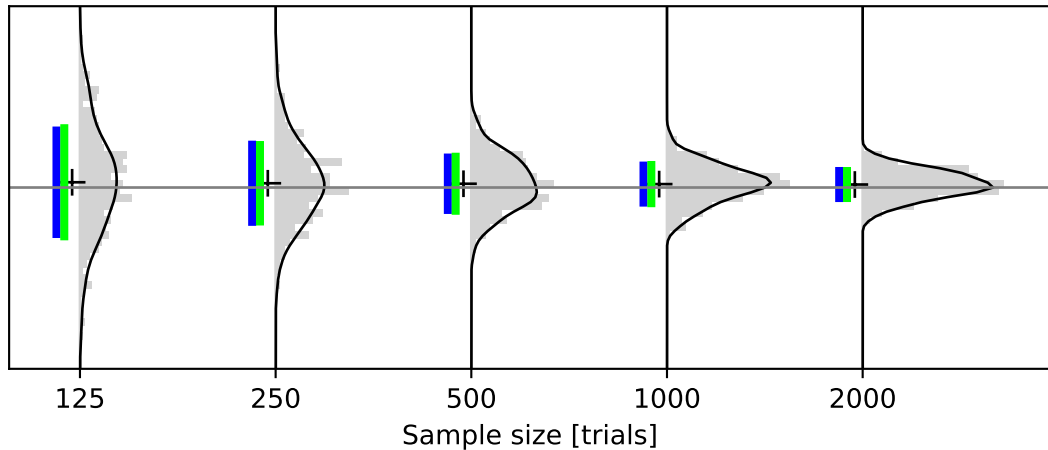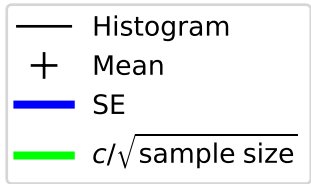

Supplement: supplementary_material [file attachment]

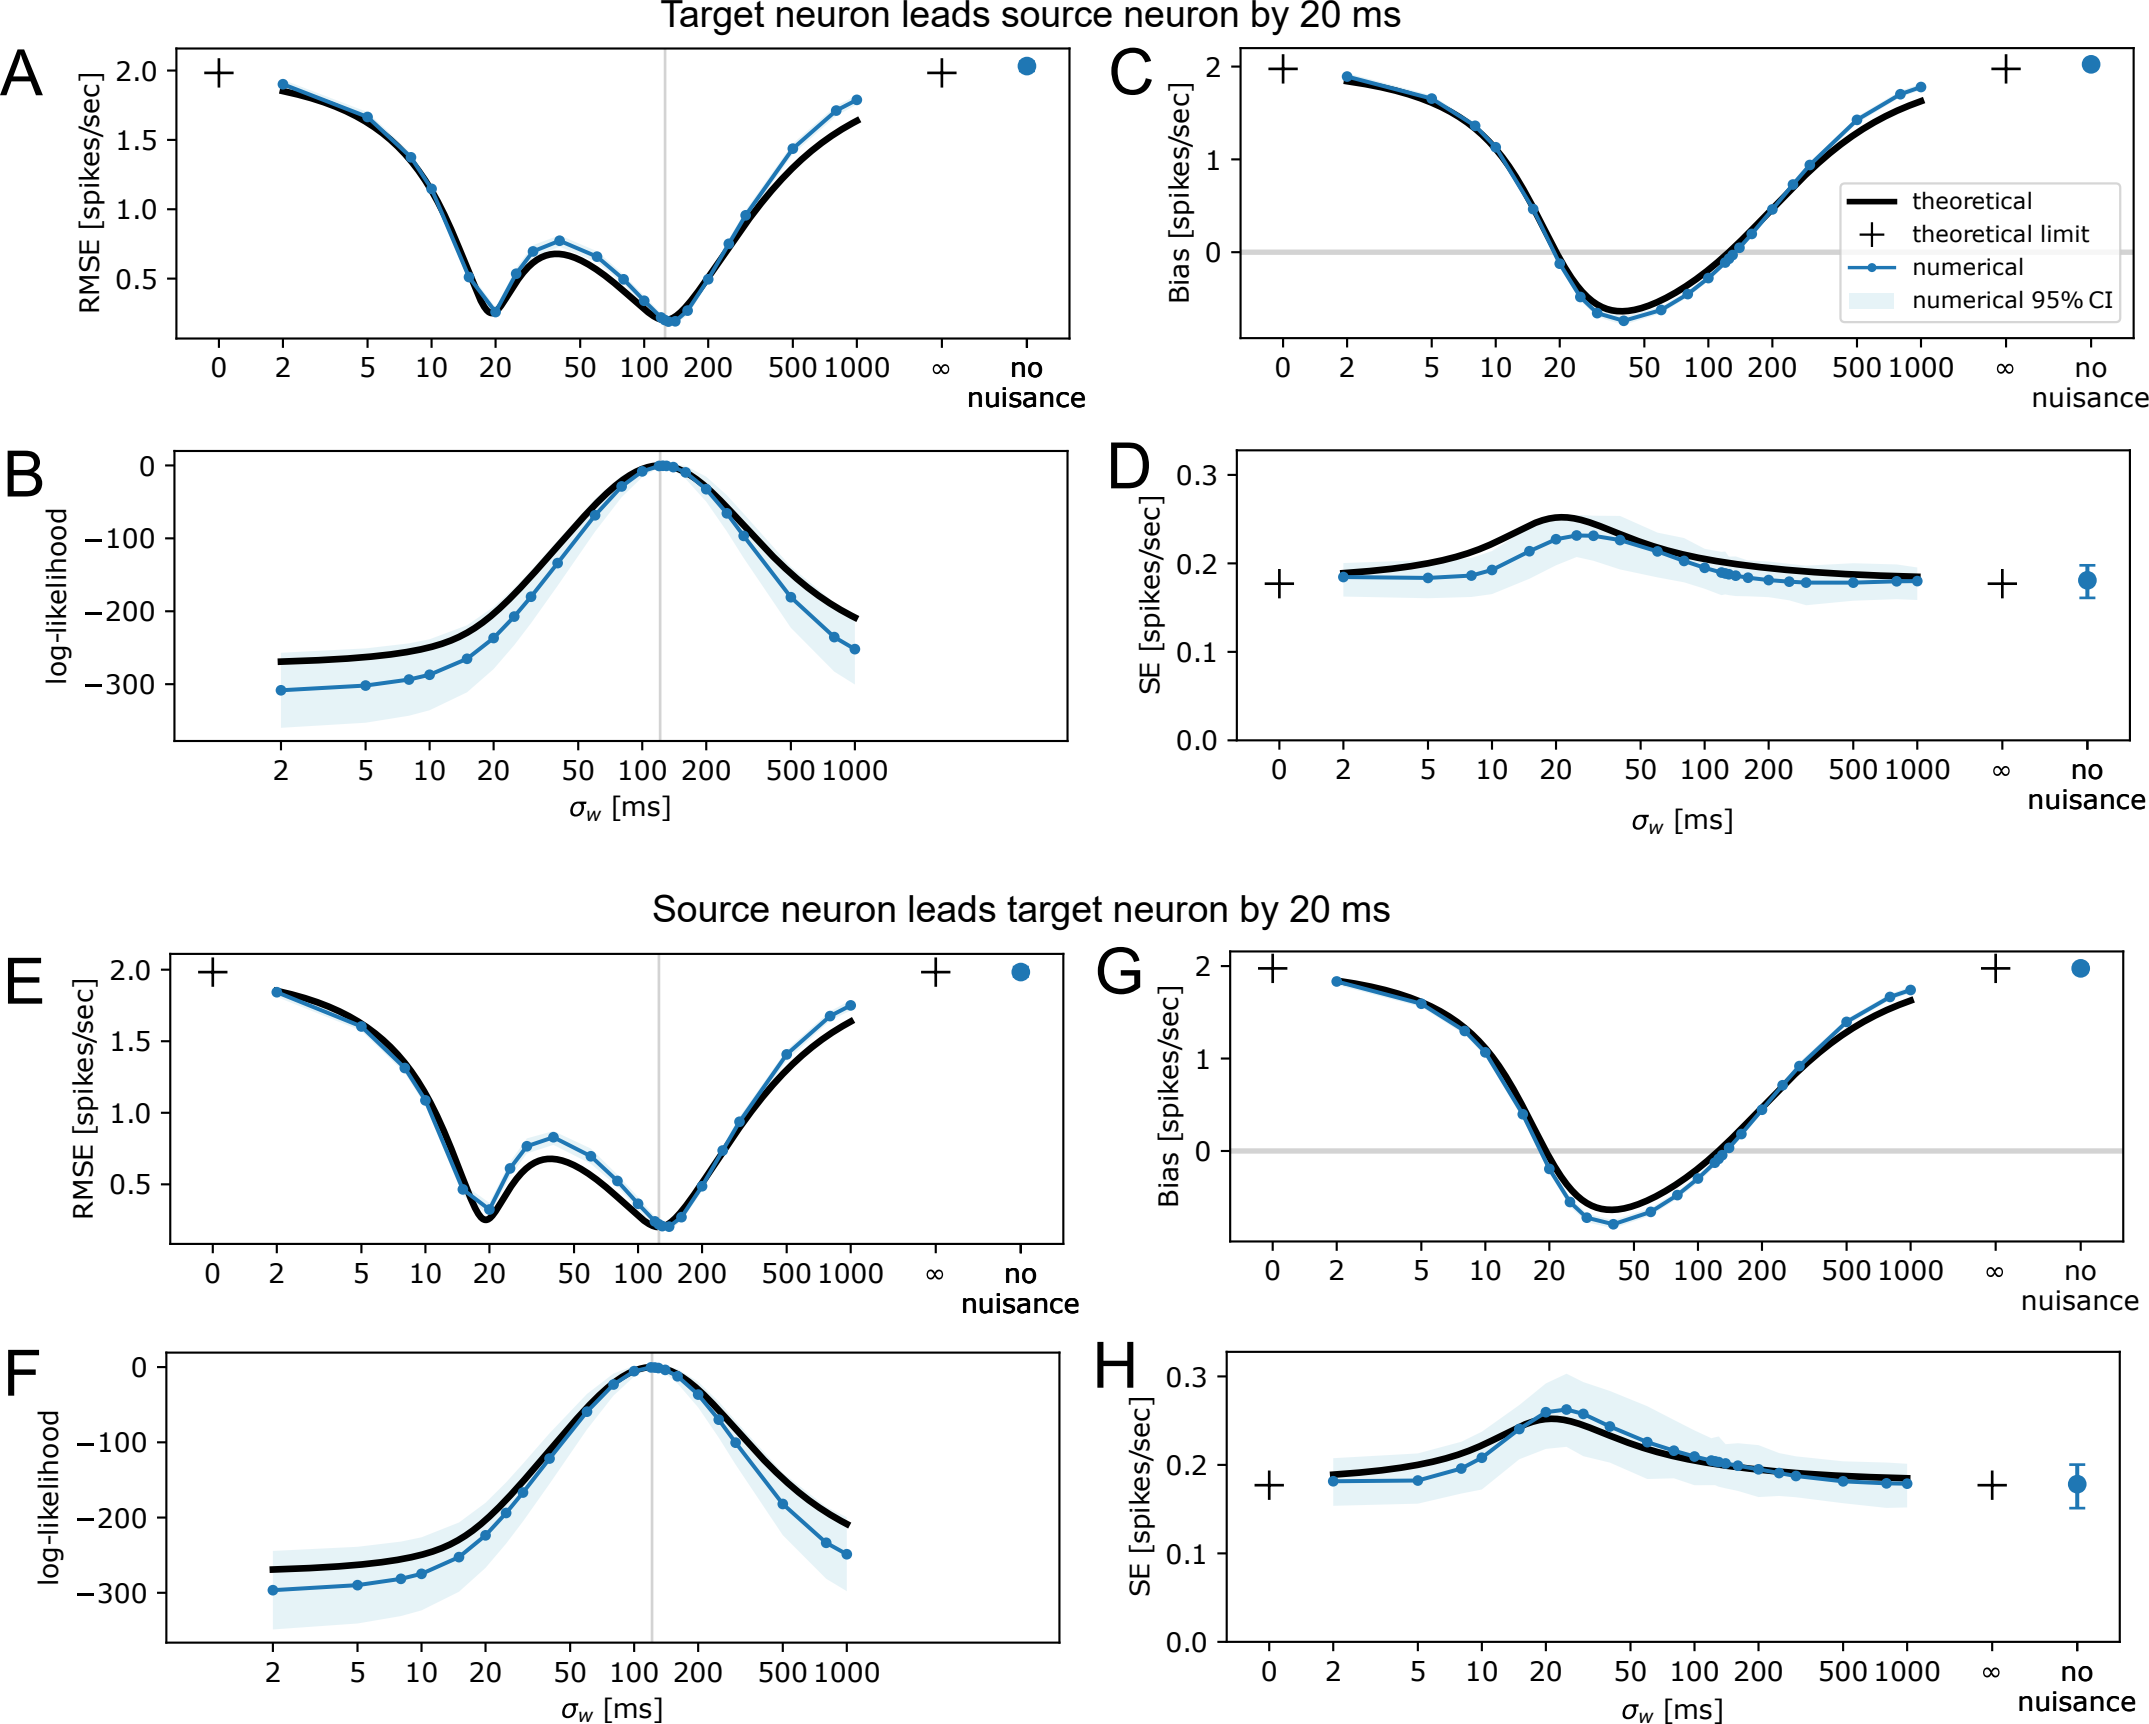

Supplement: supplementary_material [file attachment]

A

V1→LM pairs

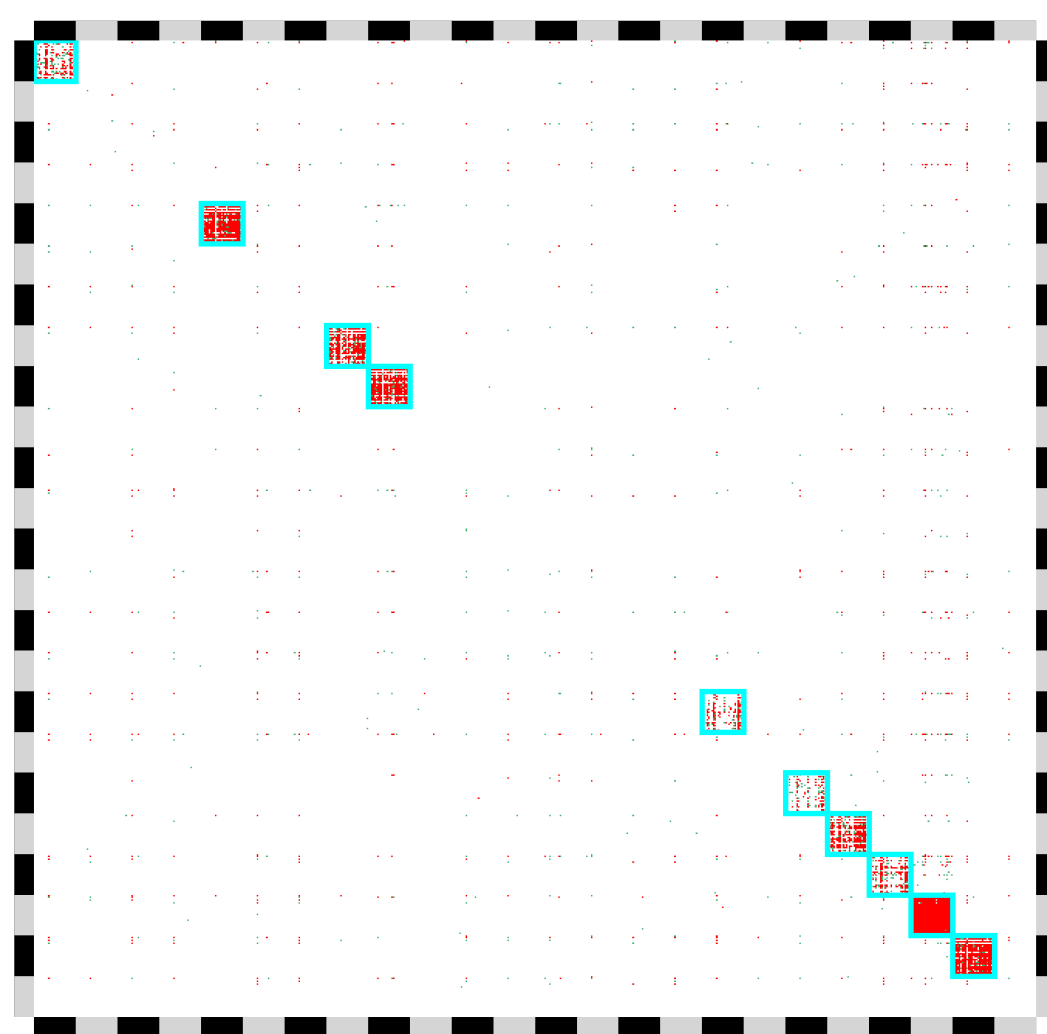

LM→AL pairs

C

V1→LM pairs

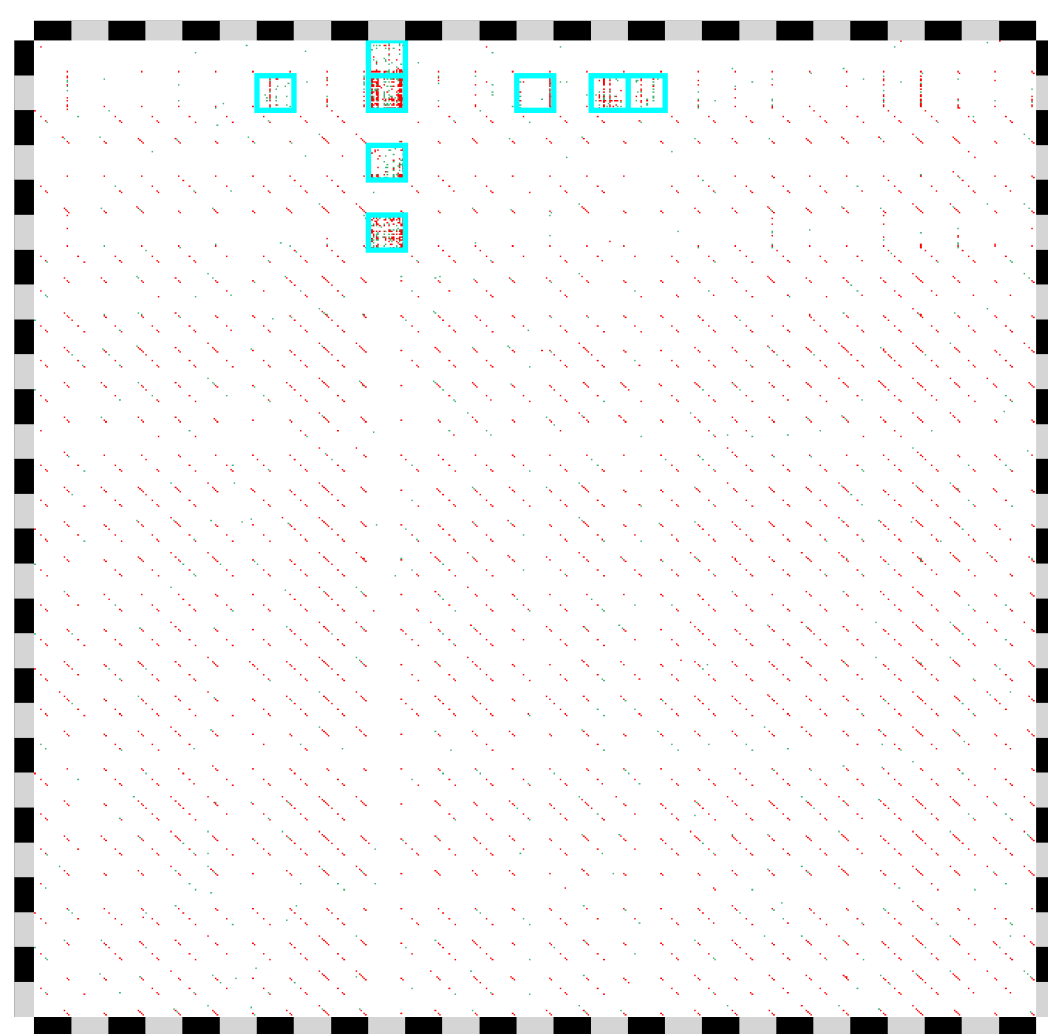

LM→AL pairs

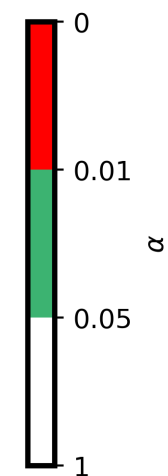

B

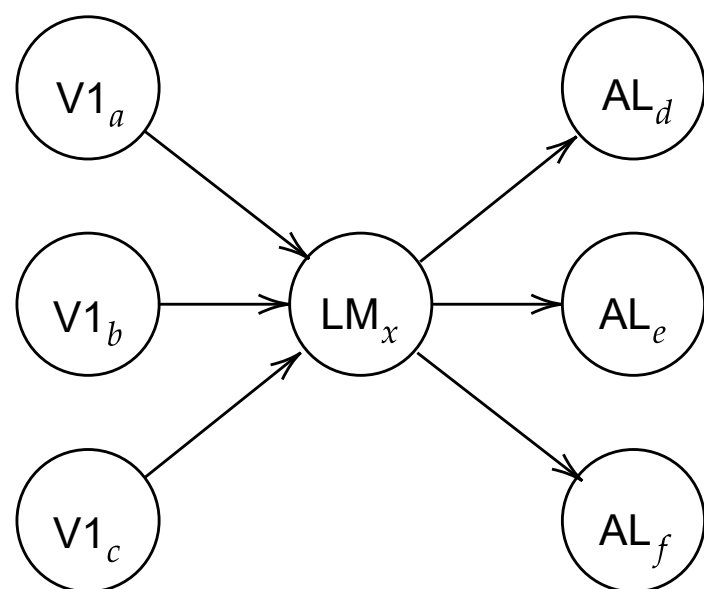

D

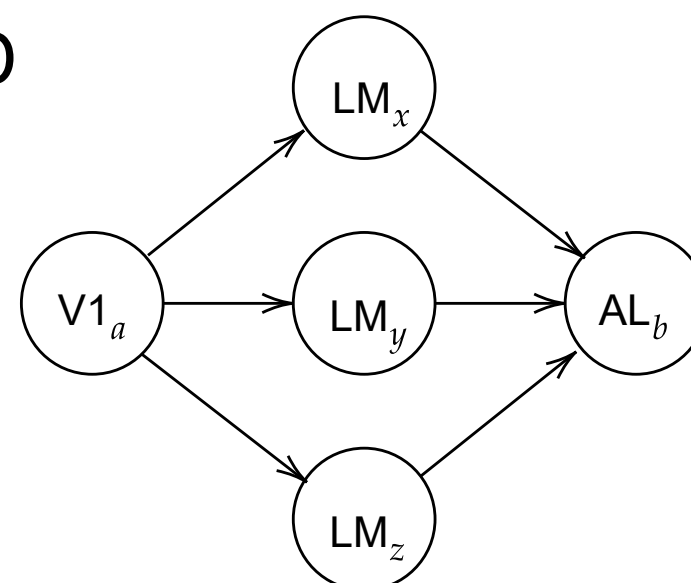

Supplement: supplementary_material [file attachment]

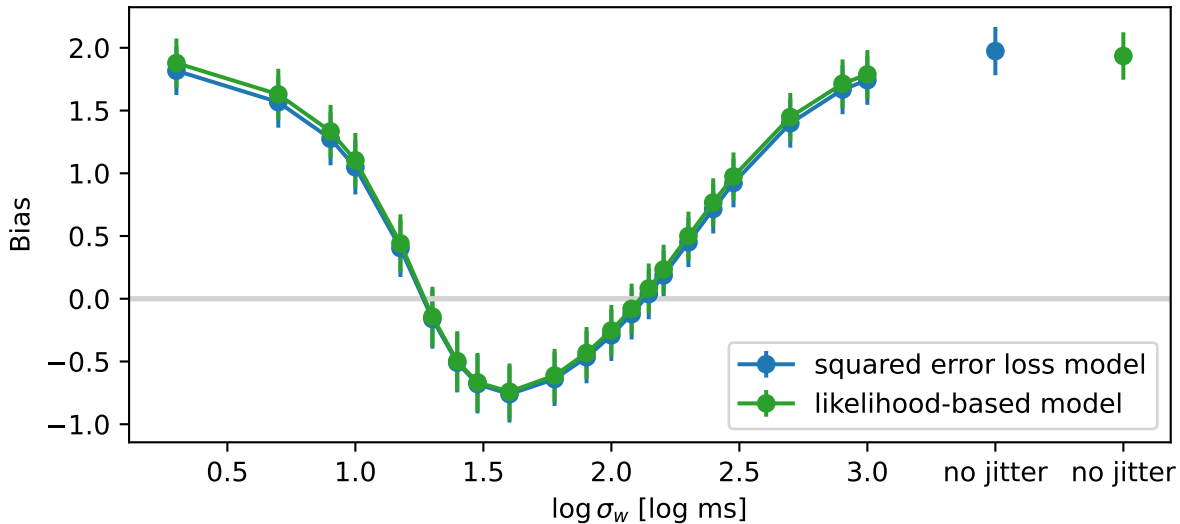

Supplement: supplementary_material [file attachment]

**A**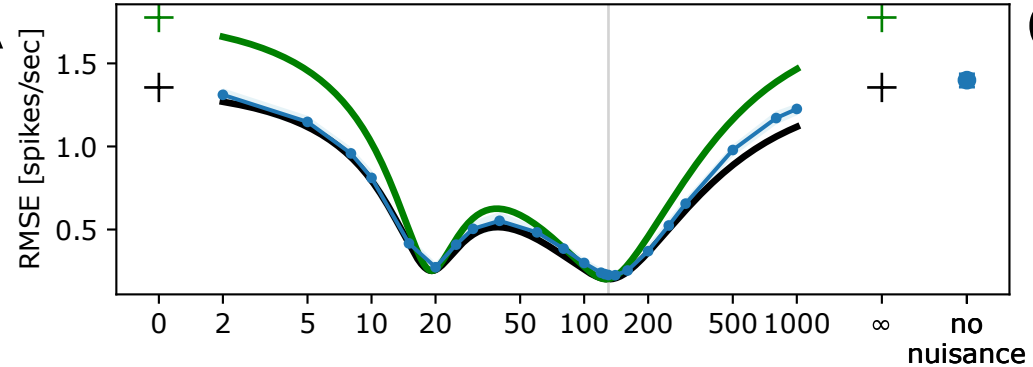**B**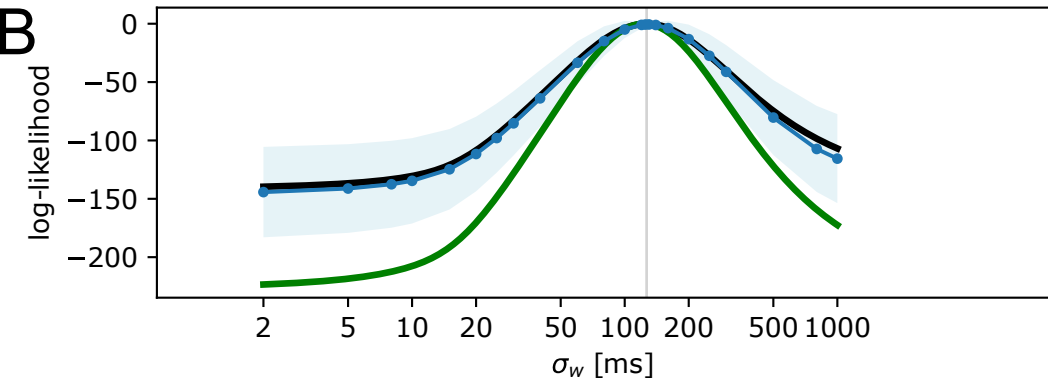**C**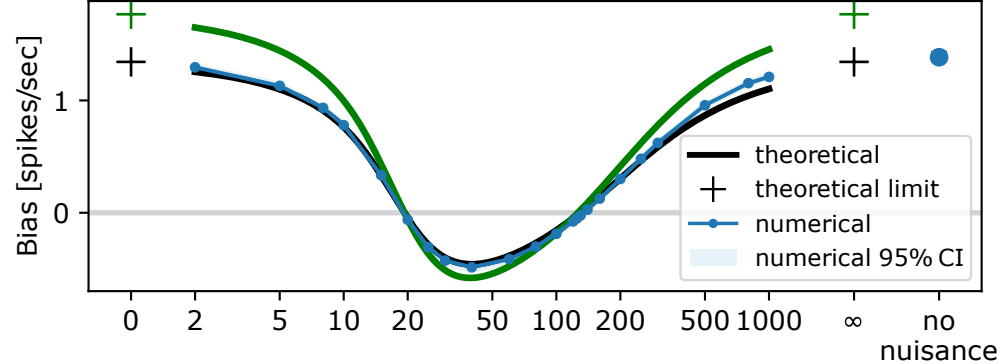**D**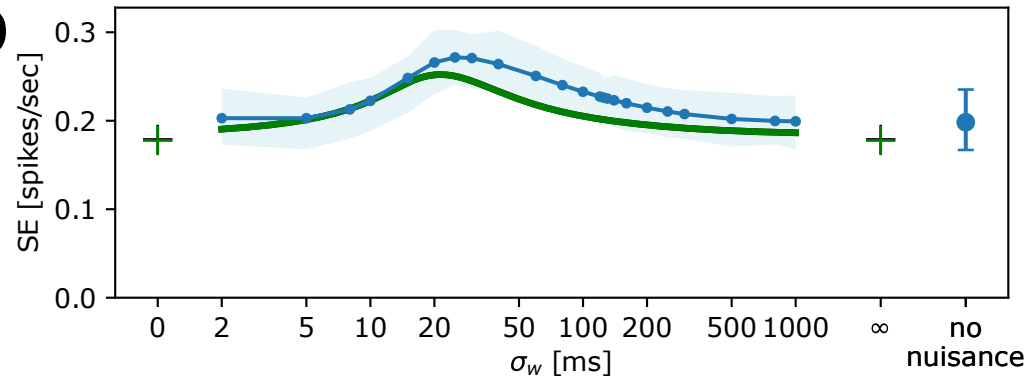

Supplement: supplementary_material [file attachment]

**A**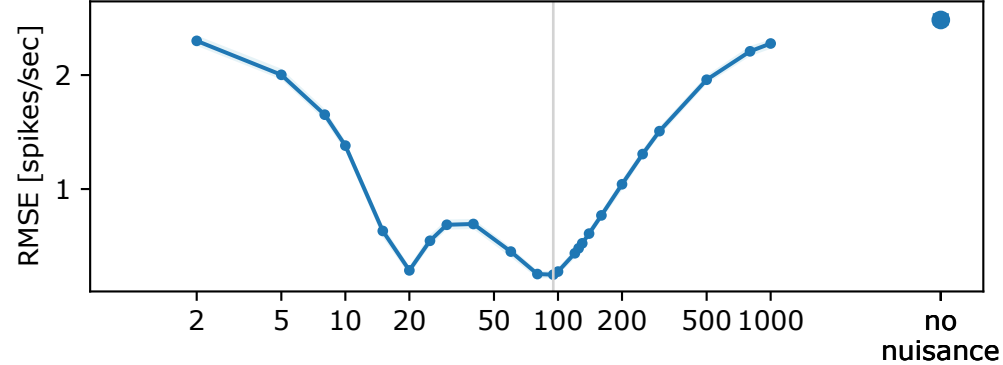**B**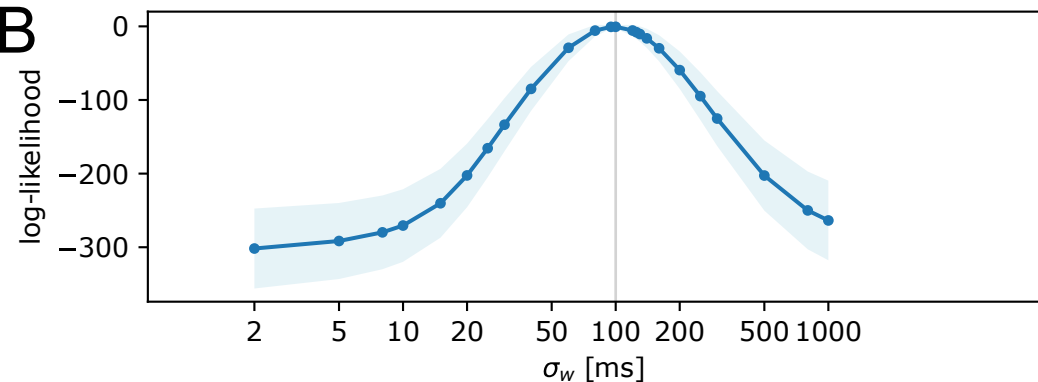**C**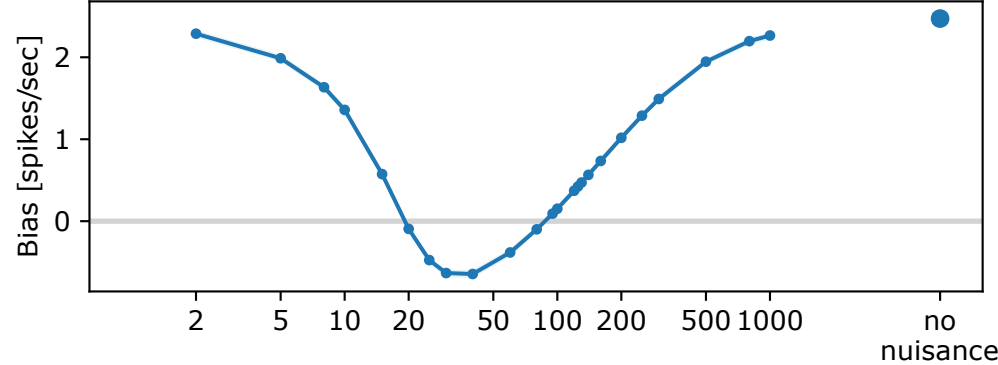**D**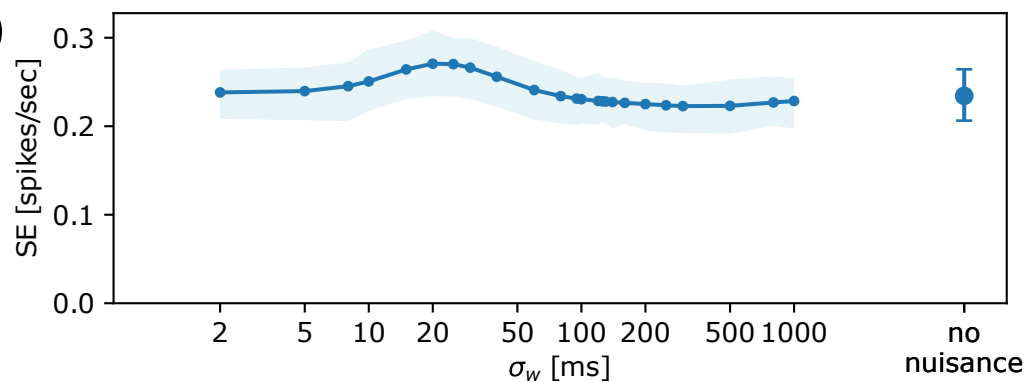

Supplement: supplementary_material [file attachment]

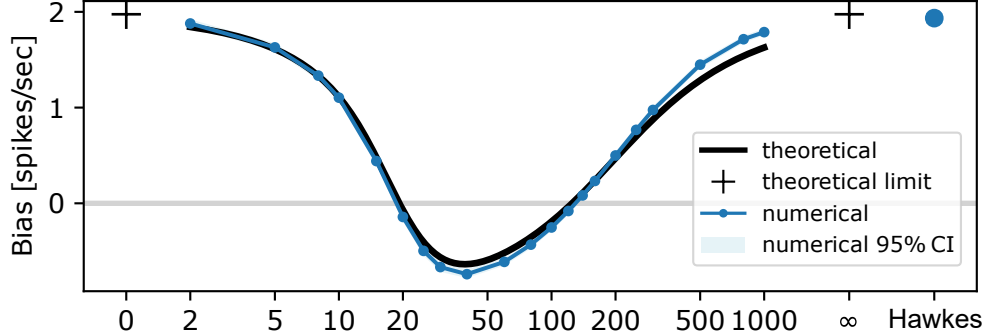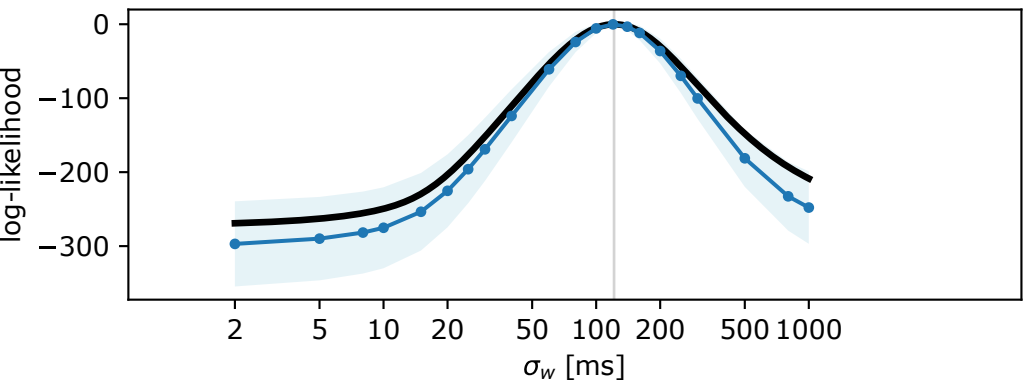

Supplement: supplementary_material [file attachment]

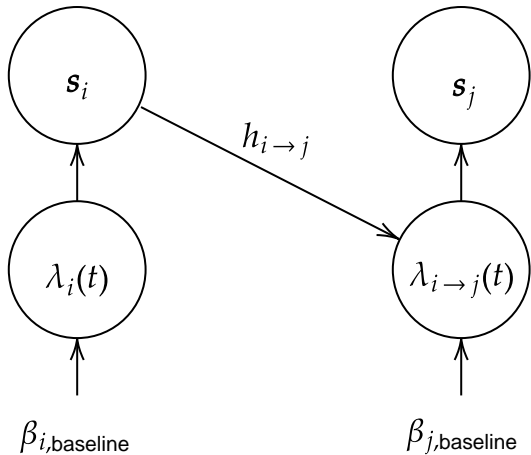

Supplement: supplementary_material [file attachment]

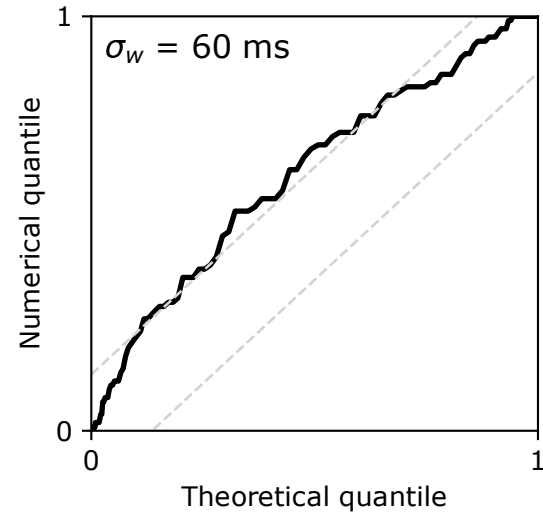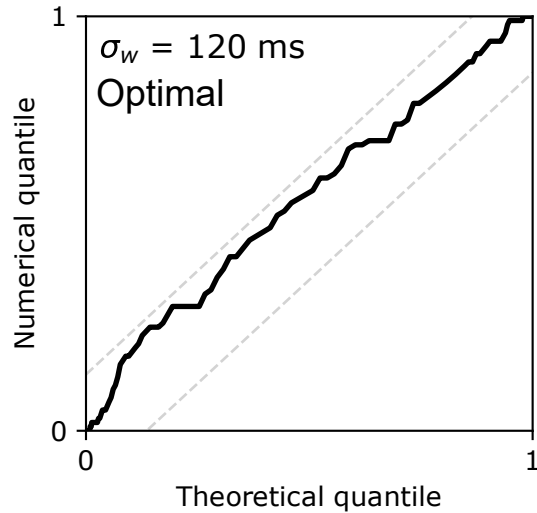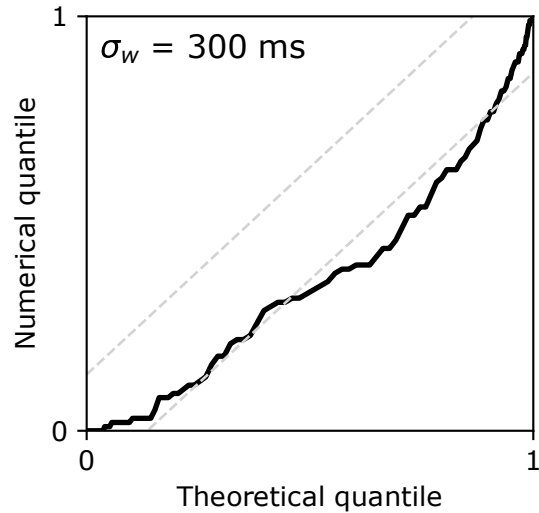

Supplement: supplementary_material [file attachment]

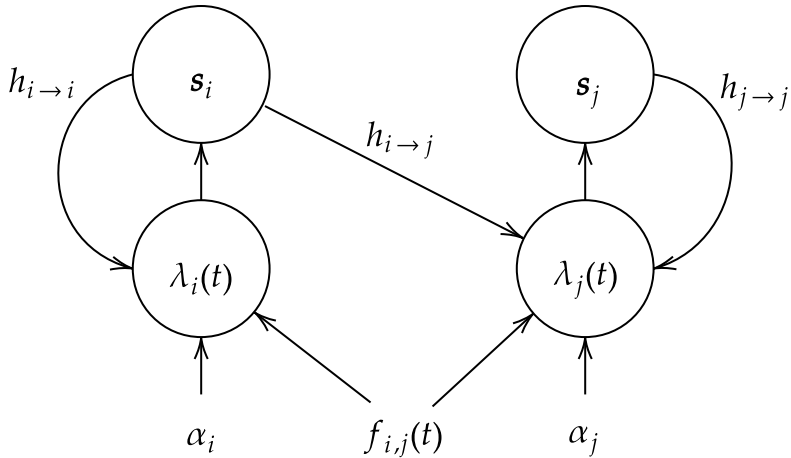

Supplement: supplementary_material [file attachment]

**A**

V1→LM coupling filters

Number of trials

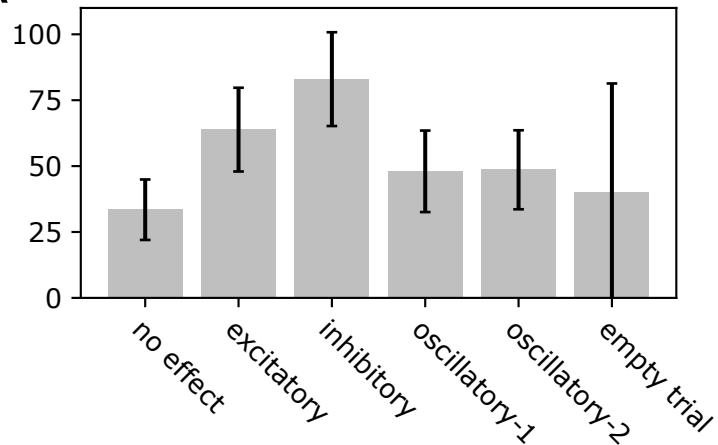**B**

LM→AL coupling filters

Number of trials

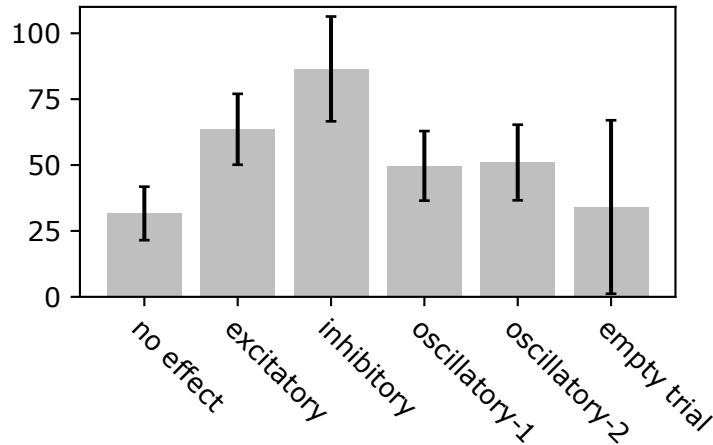

Supplement: supplementary_material [file attachment]

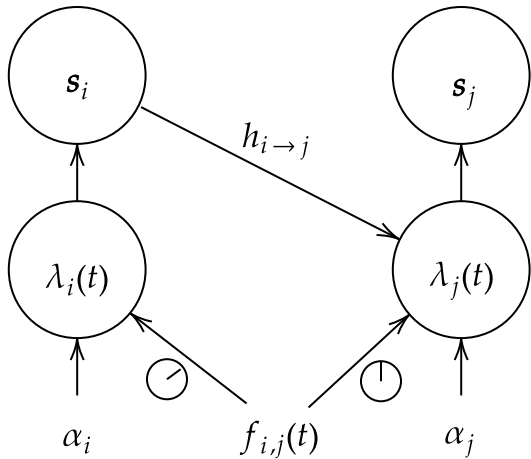

Supplement: supplementary_material [file attachment]

kernel width = 50 ms

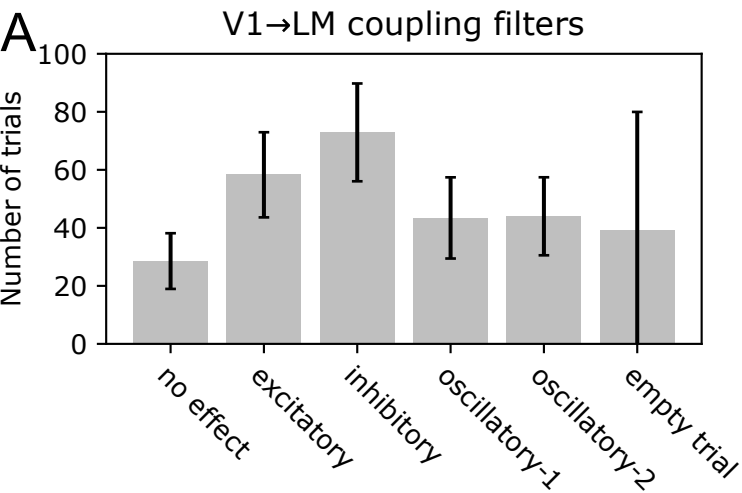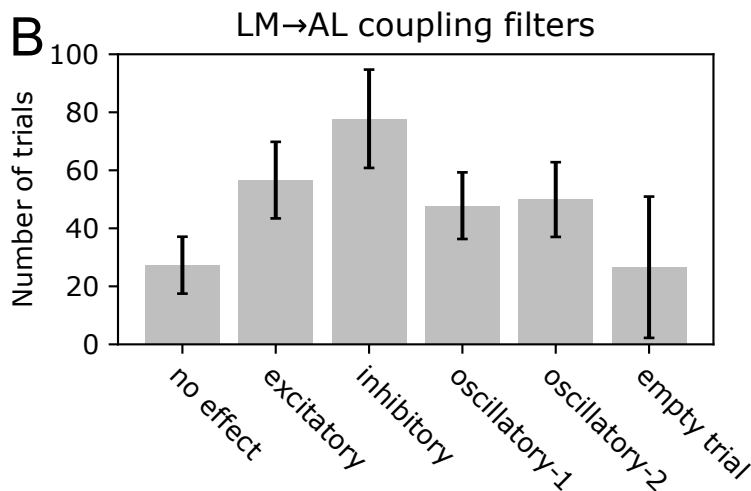

kernel width = 70 ms

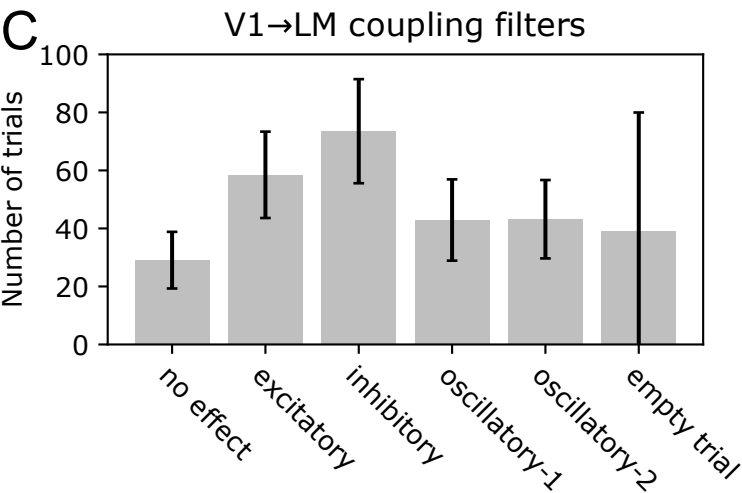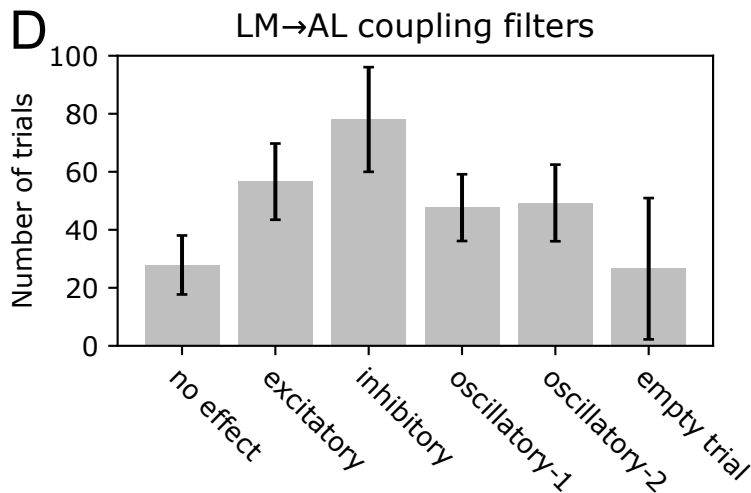

Supplement: supplementary_material [file attachment]

Realization

jitter window

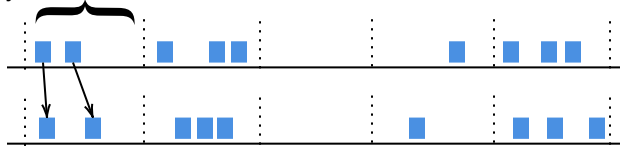

Monte Carlo sample

Time →

Supplement: supplementary_material [file attachment]

**A****Background activity**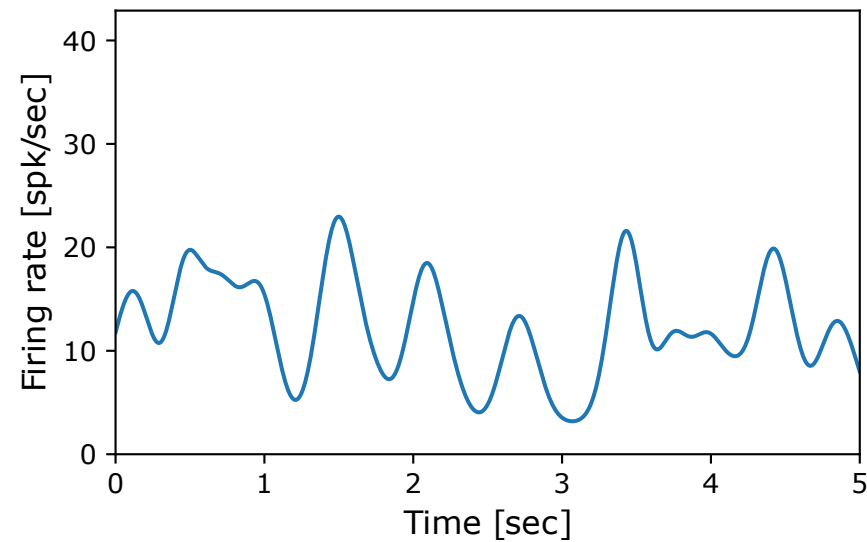**B****Conditional inference**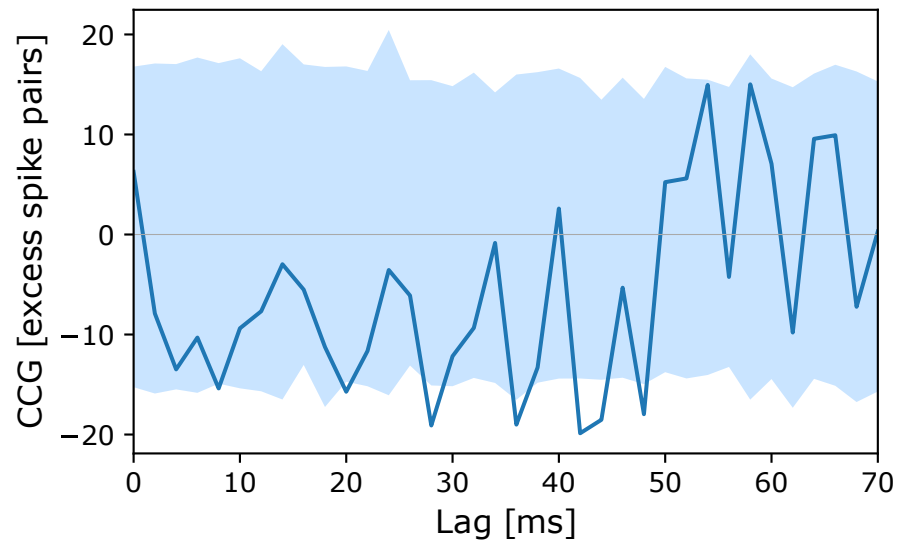**C****Hawkes**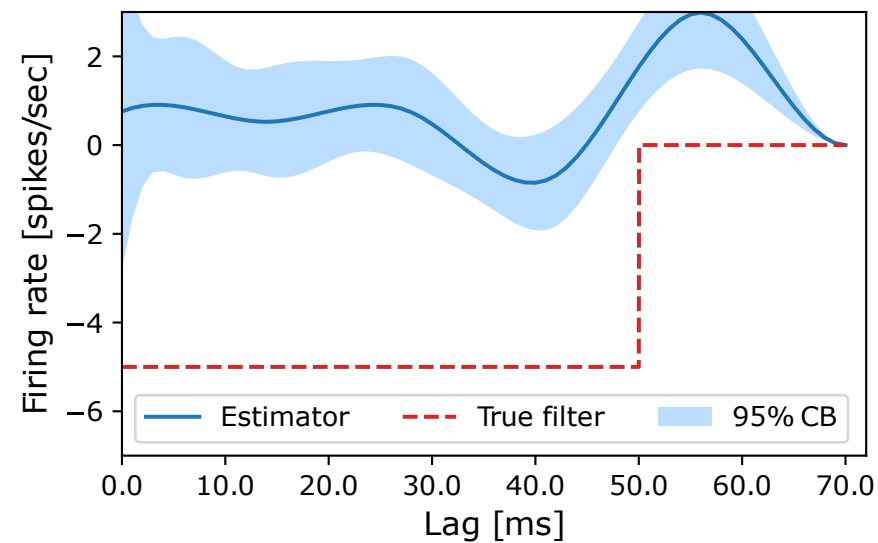**D****Our model**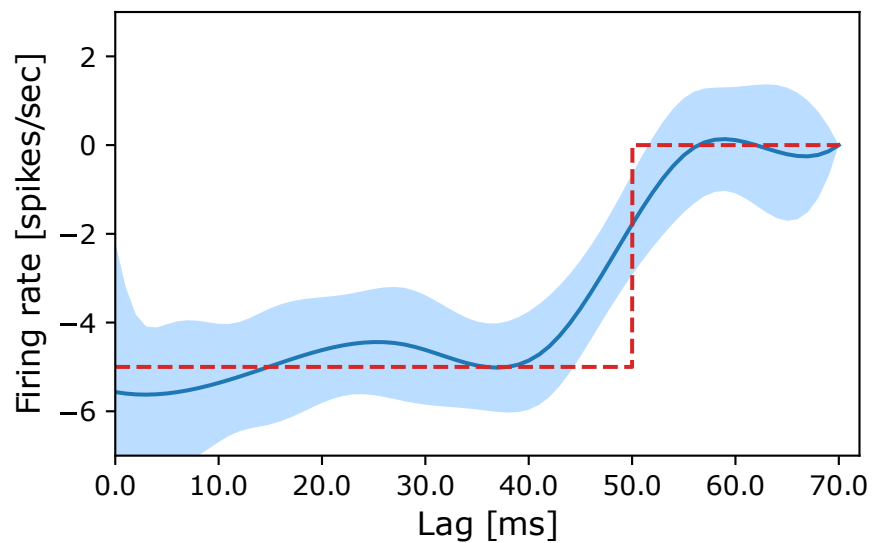

Supplement: supplementary_material [file attachment]

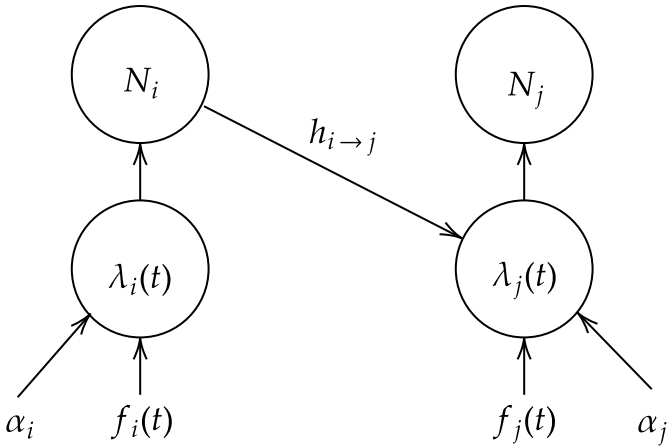

Supplement: supplementary_material [file attachment]

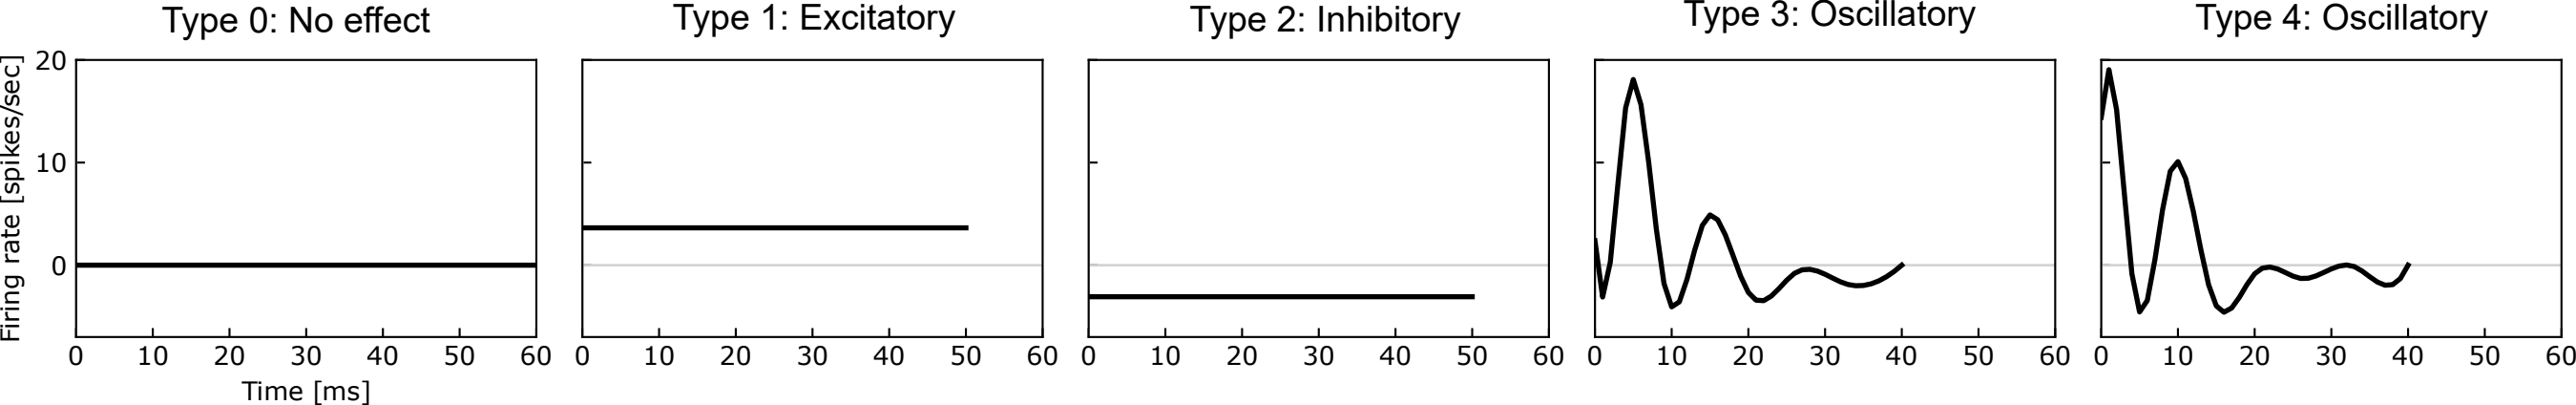

Supplement: supplementary_material [file attachment]

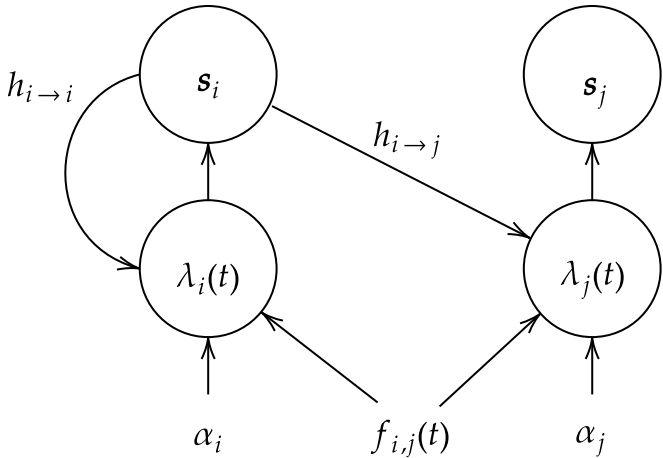

Supplement: supplementary_material [file attachment]

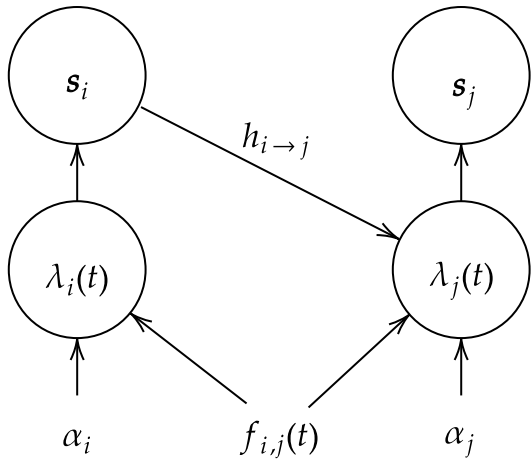

Supplement: supplementary_material [file attachment]

bias

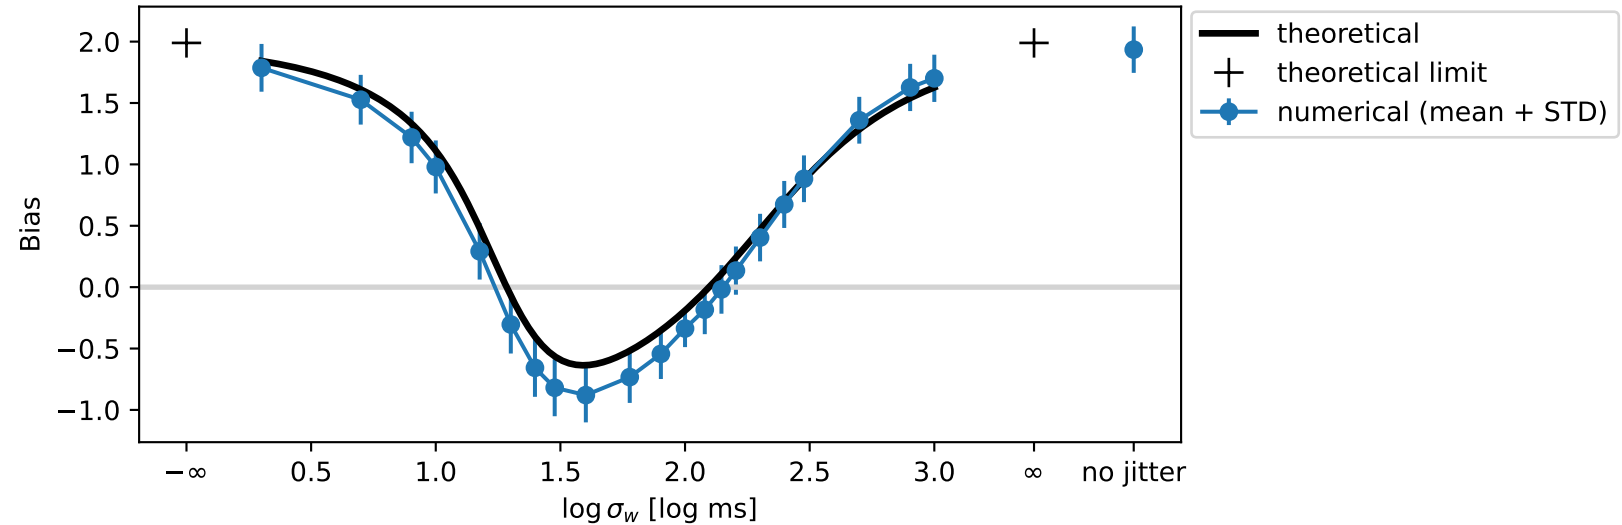

Supplement: supplementary_material [file attachment]

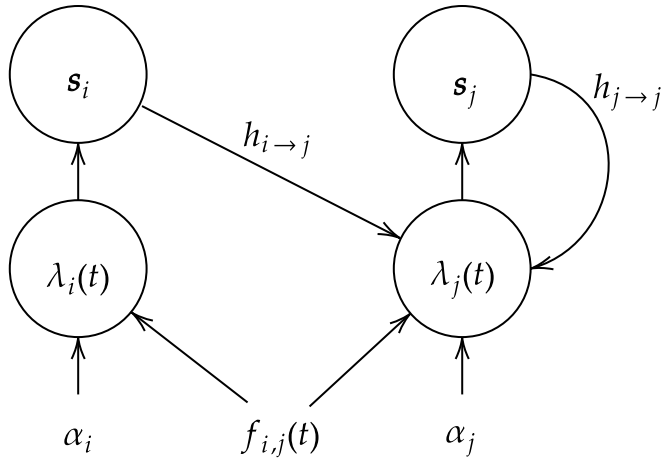

Supplement: supplementary_material [file attachment]

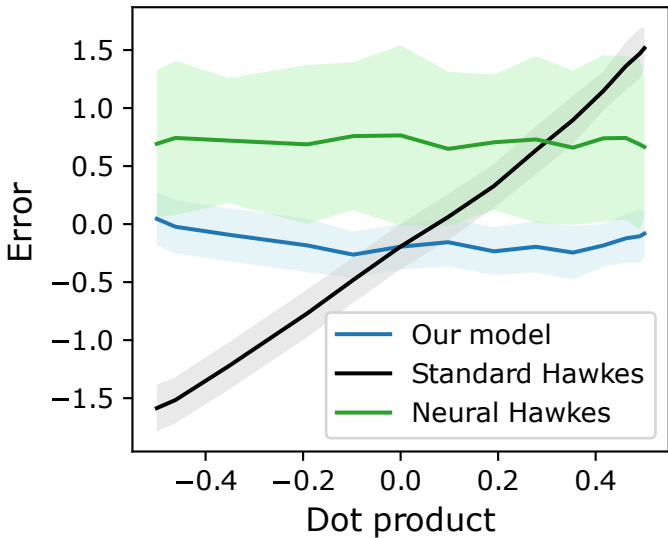

Supplement: supplementary_material [file attachment]

**A**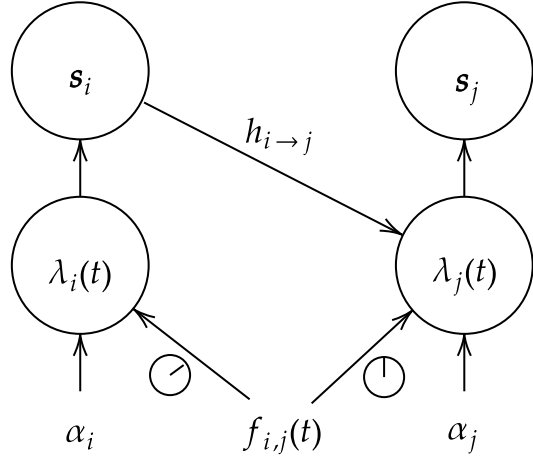**B**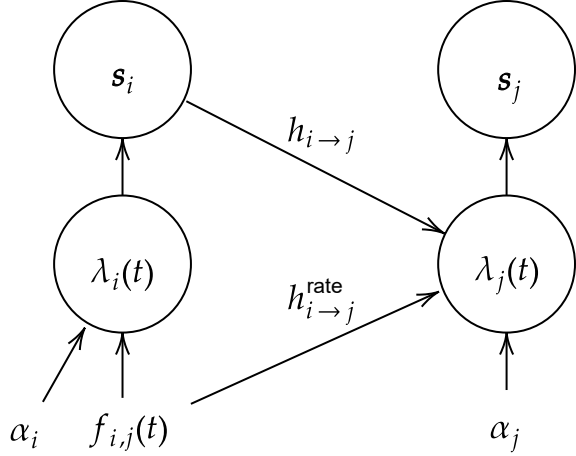

Supplement: supplementary_material [file attachment]

**A**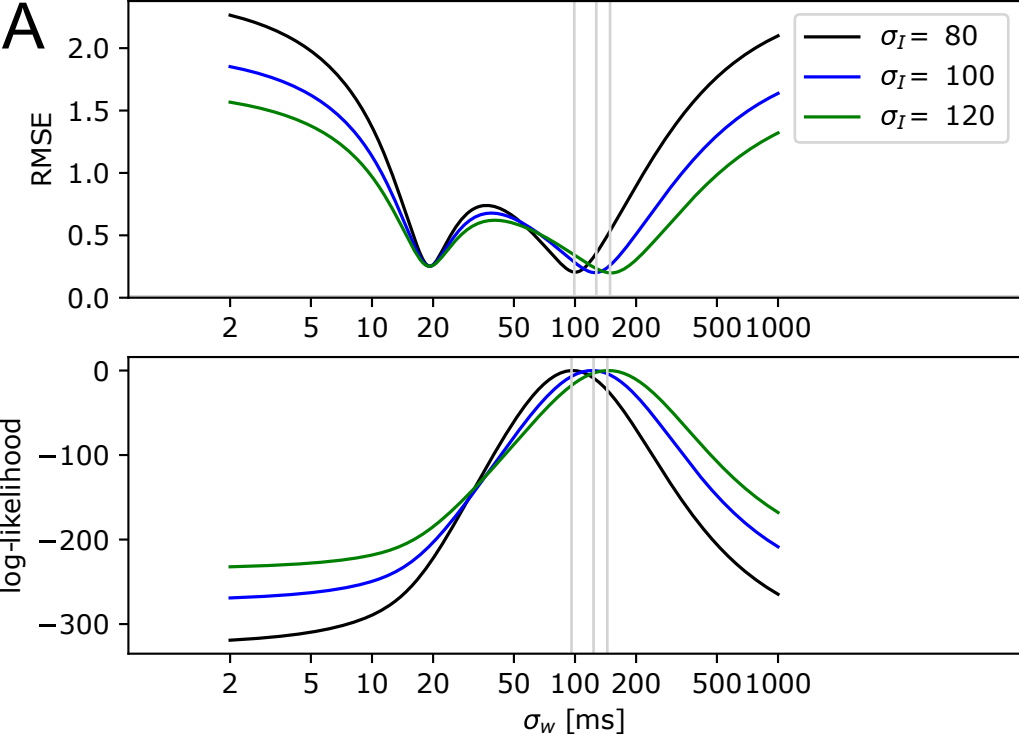**B**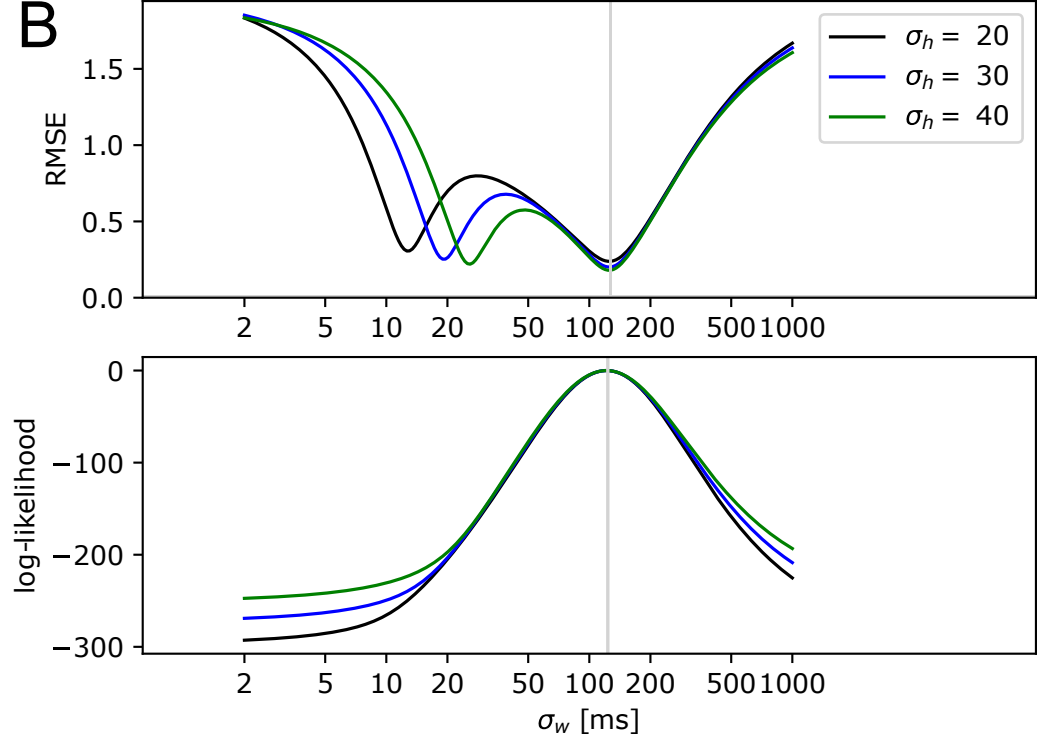

Supplement: supplementary_material [file attachment]

**A**

V1→LM coupling filters

Number of trials

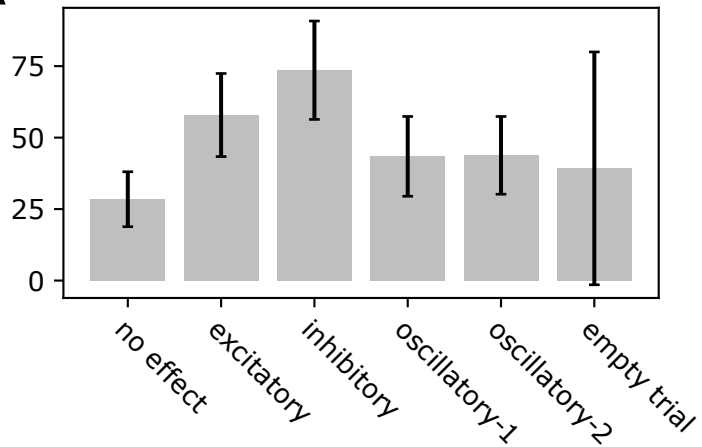**B**

LM→AL coupling filters

Number of trials

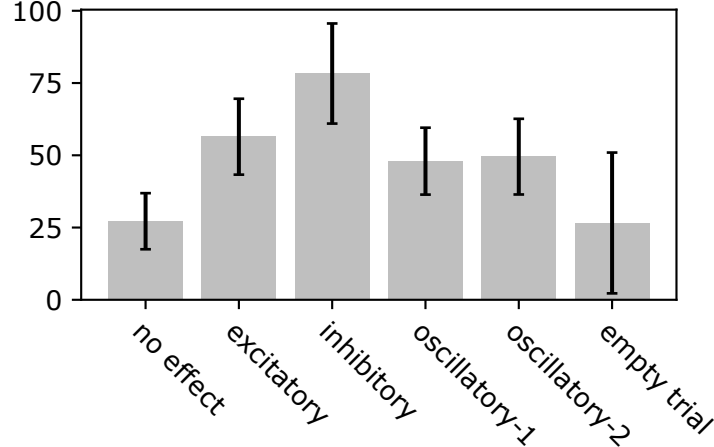

Supplement: supplementary_material [file attachment]

True

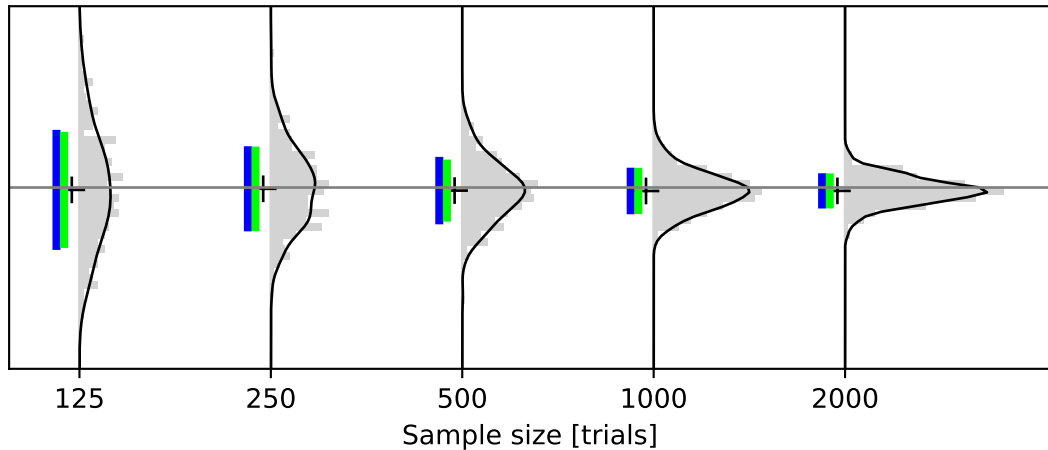

Supplement: supplementary_material [file attachment]

# Hawkes

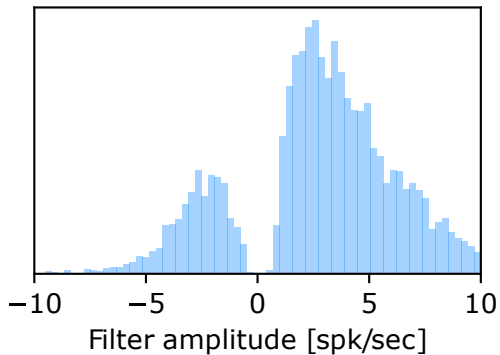

# Our model

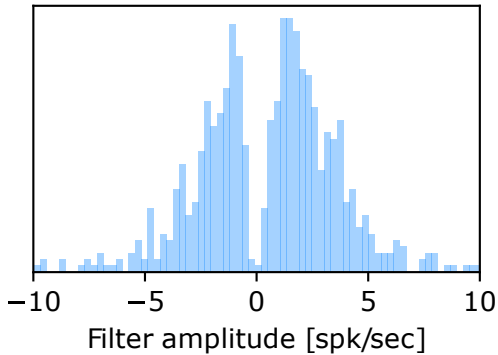

Supplement: supplementary_material [file attachment]

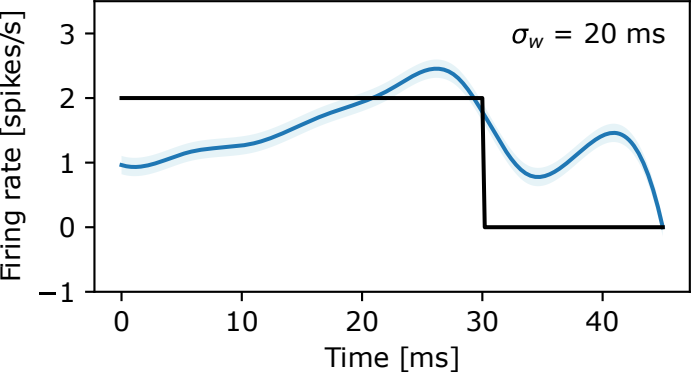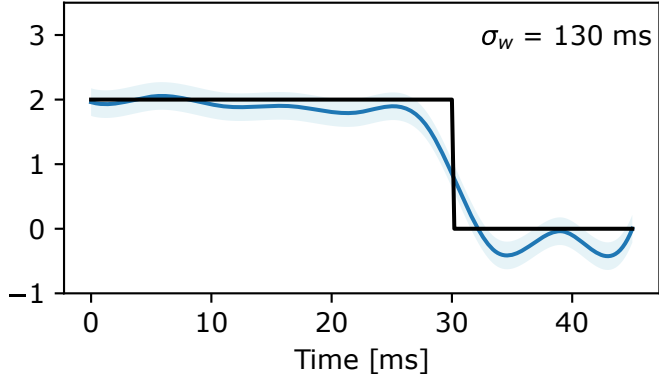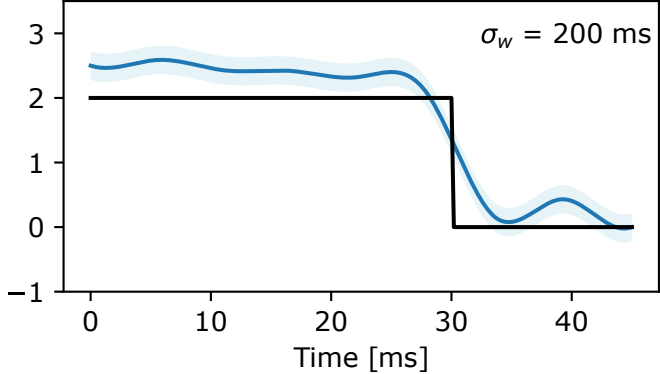

Supplement: supplementary_material [file attachment]

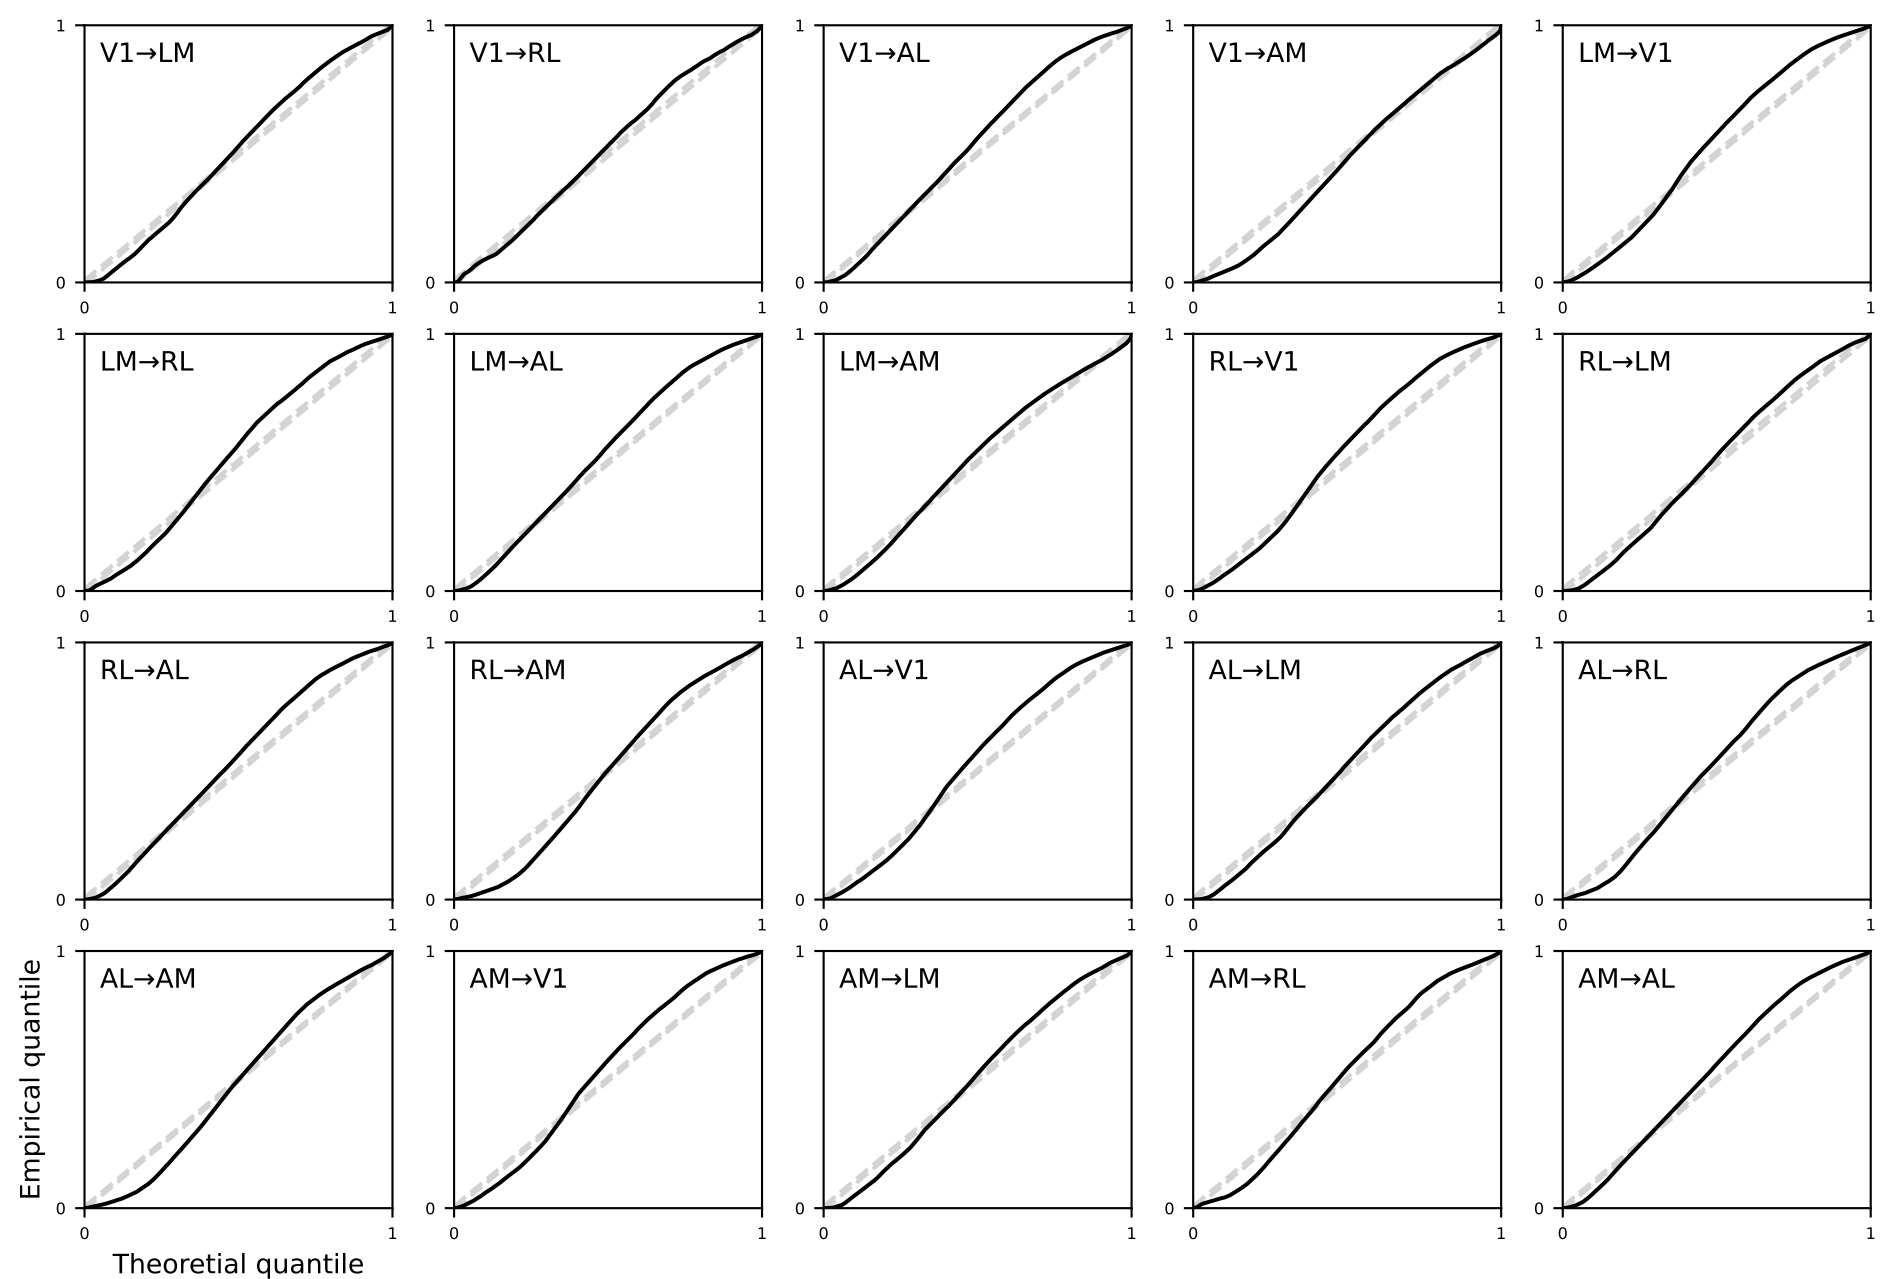

Supplement: supplementary_material [file attachment]

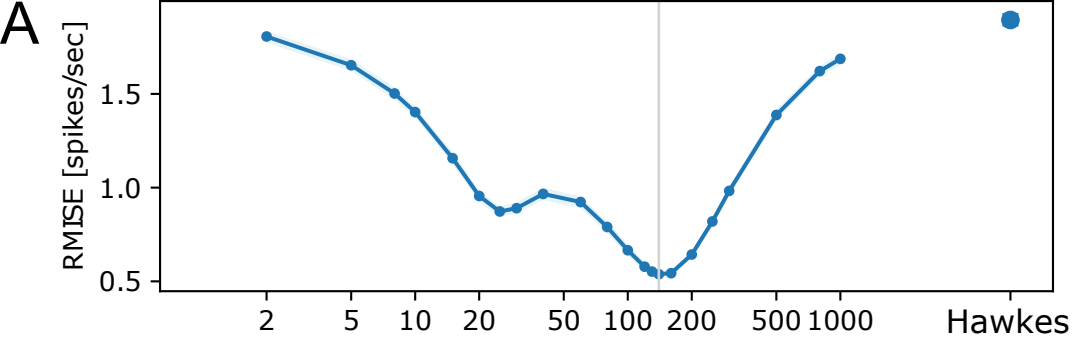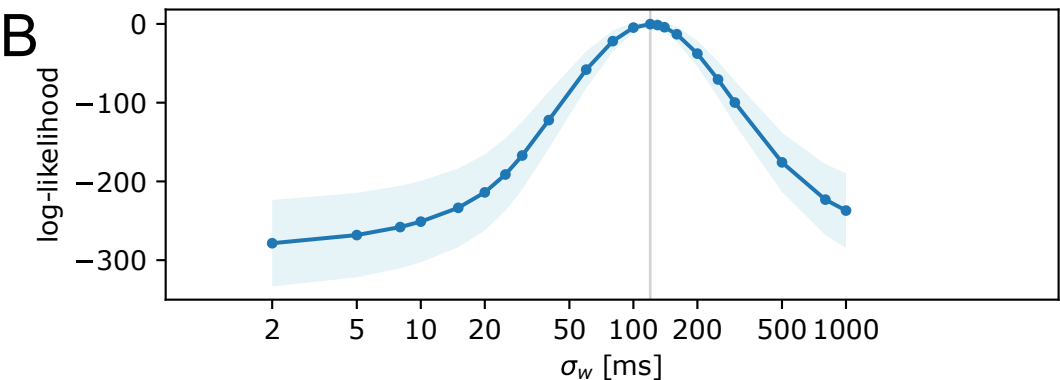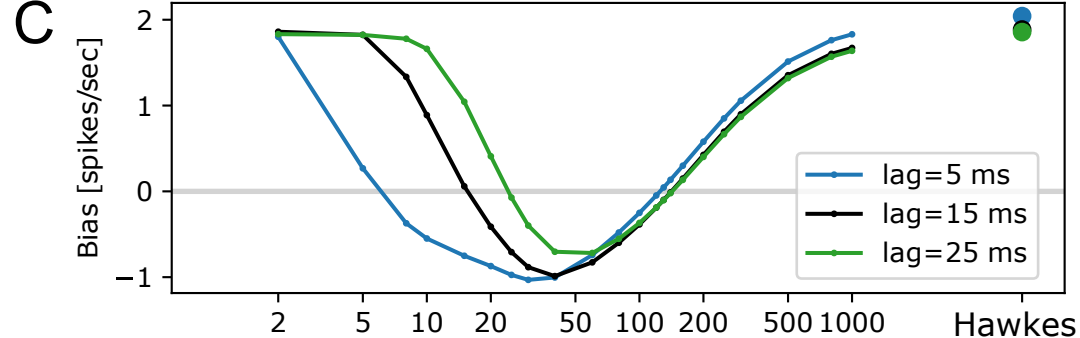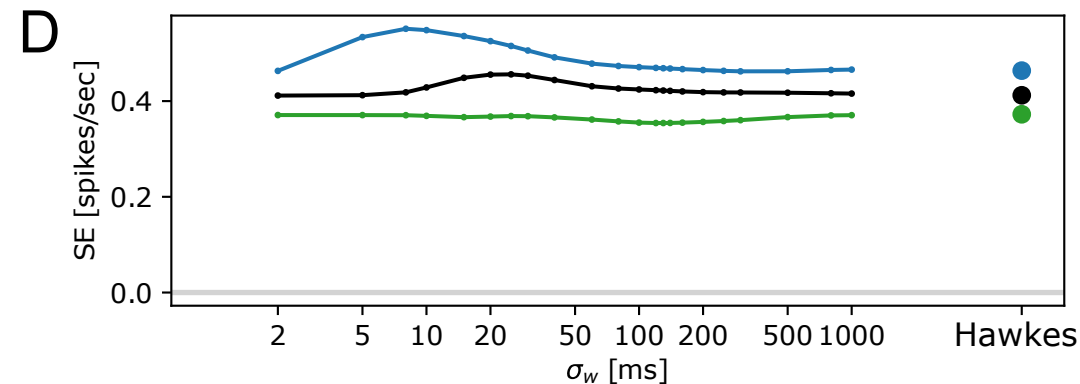

Supplement: supplementary_material [file attachment]

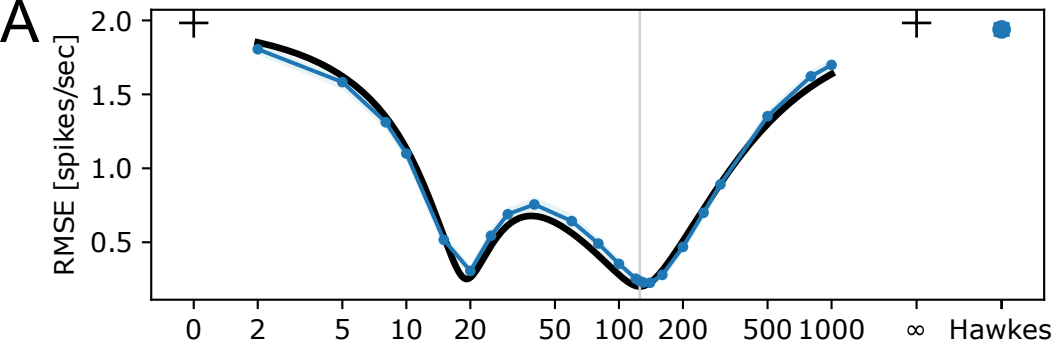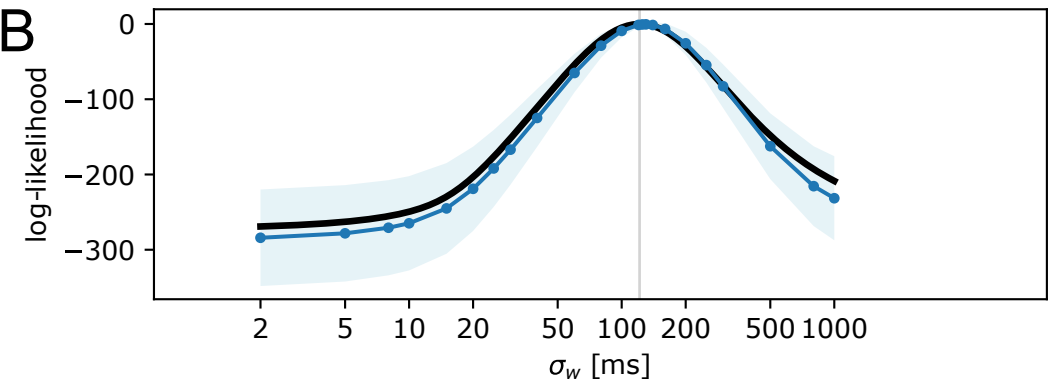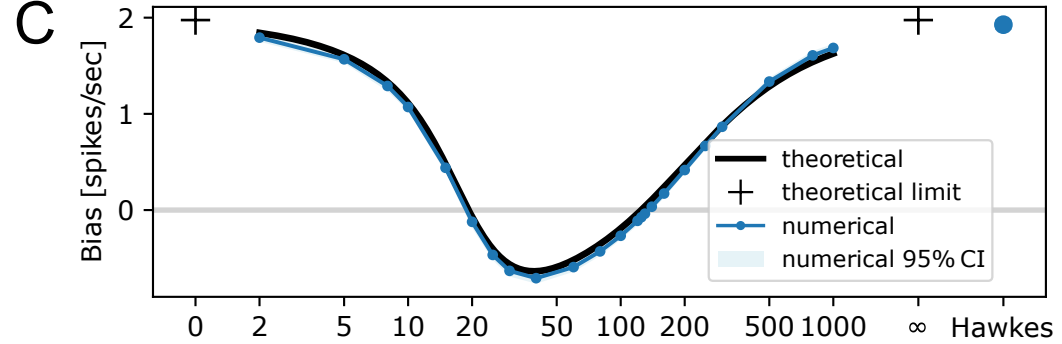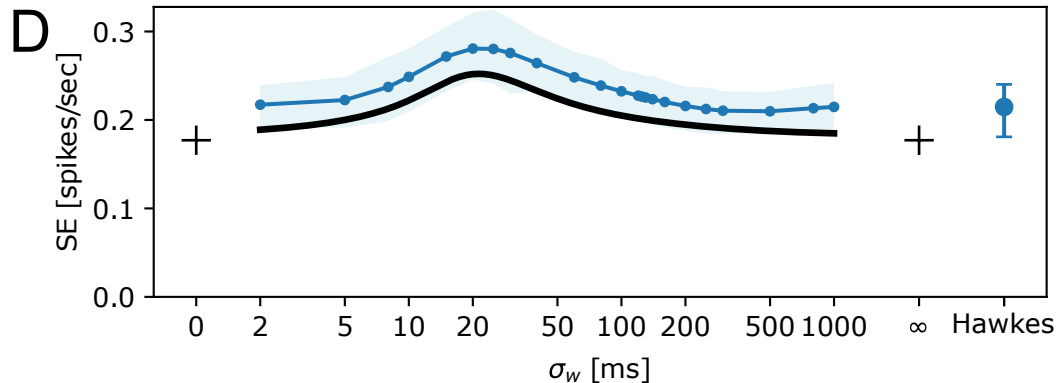

Supplement: supplementary_material [file attachment]

bias

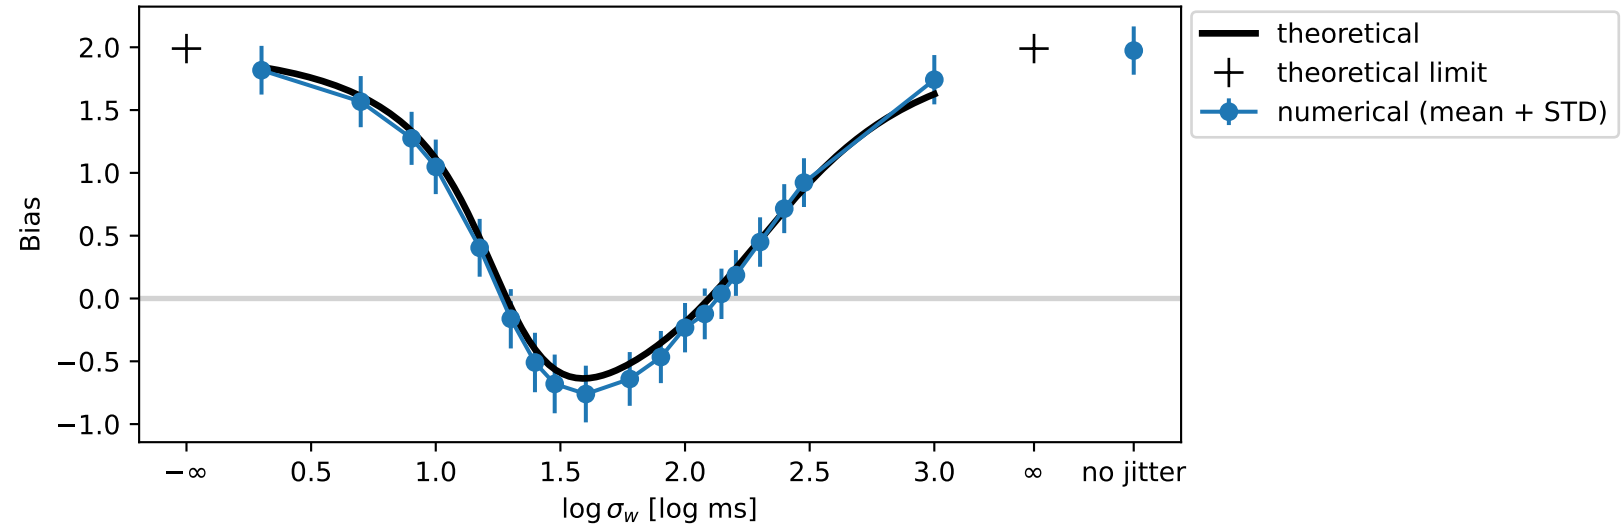

Supplement: supplementary_material [file attachment]

**A****B**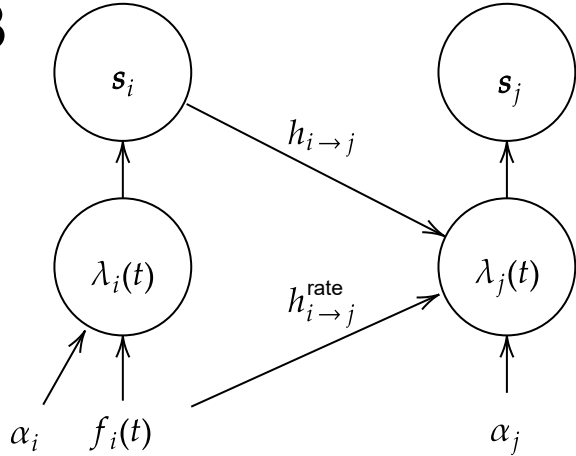

Supplement: supplementary_material [file attachment]

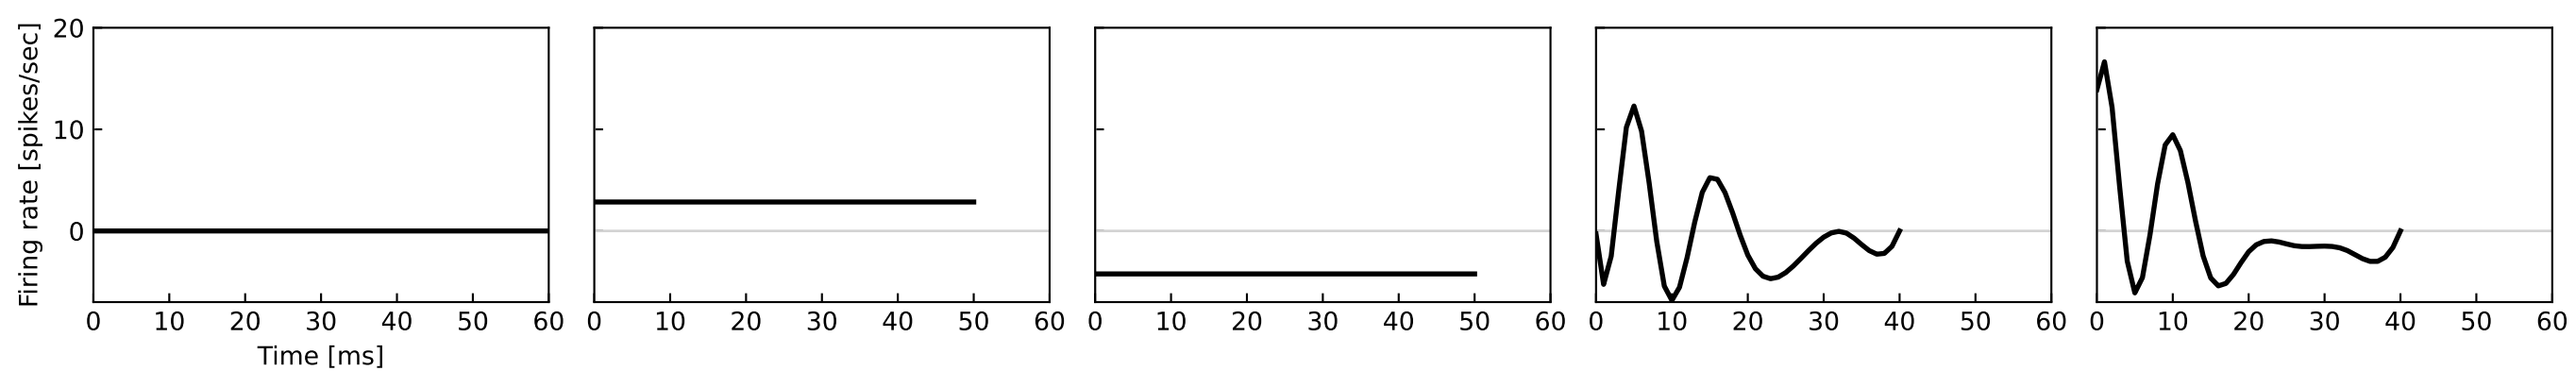

Supplement: supplementary_material [file attachment]
